# Supplementary material for: Extensive variation in synonymous substitution rates in mitochondrial genes of seed plants
Source: PubMed Central journal article supplement (PMC1973135; doi:10.1186/1471-2148-7-135), 2007-08-09
Supplement: 1471-2148-7-135-S1.pdf [file 1471-2148-7-135-S1.pdf]

**Supplementary Figure 1 - Caryophyllaceae phylogeny and divergence times.** (a) Phylogeny of Caryophyllaceae and sister families (Amaranthaceae, Achatocarpaceae) resulting from a maximum likelihood analysis of the chloroplast *matK* gene using a GTR+G+I model in PAUP\*. The five taxa at bottom were defined as the outgroup. Numbers above each node represent bootstrap values from 100 replicates. Only values above 50% are shown. (b) Chronogram of Caryophyllaceae resulting from a penalized likelihood analysis of the *matK* ML tree shown in (a) using the program r8s. To calibrate the tree, a divergence time of 38 Myr was used for the split between Caryophyllaceae and the sister families Amaranthaceae and Achatocarpaceae (Wikstrom et al., 2001). S. = *Silene*.

**Supplementary Figure 2 - Unconstrained survey of synonymous sequence divergence.** Shown are the  $d_S$  trees from unconstrained analyses of the *atp1* data set used in Figure 1, the *cox1* data set used in Figure 2, and the *matR* data set used in Figure 3. Taxa with long branches that were labeled in Figures 1–3 are also labeled here for comparison.

**Supplementary Figure 3 - Unconstrained multigene analysis of synonymous and nonsynonymous sequence divergence.** Shown are the  $d_S$  (left) and  $d_N$  (right) trees from an unconstrained analysis of the combined 5-gene data set used in Figure 4. P. = *Plantago*; S. = *Silene*.

**Supplementary Figure 4 -  $d_S$  tree for mitochondrial *atp1* at expanded scale.** Shown is the  $d_S$  tree from Figure 1 of the main text, except that all taxa are labeled and all non-*Plantago* and non-*Pelargonium* branch lengths are drawn at an expanded scale. Compressed branches for *Plantago* and *Pelargonium* are shown as thickened lines.

**Supplementary Figure 5 -  $d_S$  tree for mitochondrial *cox1* at expanded scale.** Shown is the  $d_S$  tree from Figure 2 of the main text, except that all taxa are labeled and all non-*Plantago* and non-*Pelargonium* branch lengths are drawn at an expanded scale. Compressed branches for *Plantago* and *Pelargonium* are shown as thickened lines.

**Supplementary Figure 6 -  $d_S$  tree for mitochondrial *matR* at expanded scale.** Shown is the  $d_S$  tree from Figure 3 of the main text, except that all taxa are labeled and all branch lengths are drawn at an expanded scale.

Supp. Fig. 1a

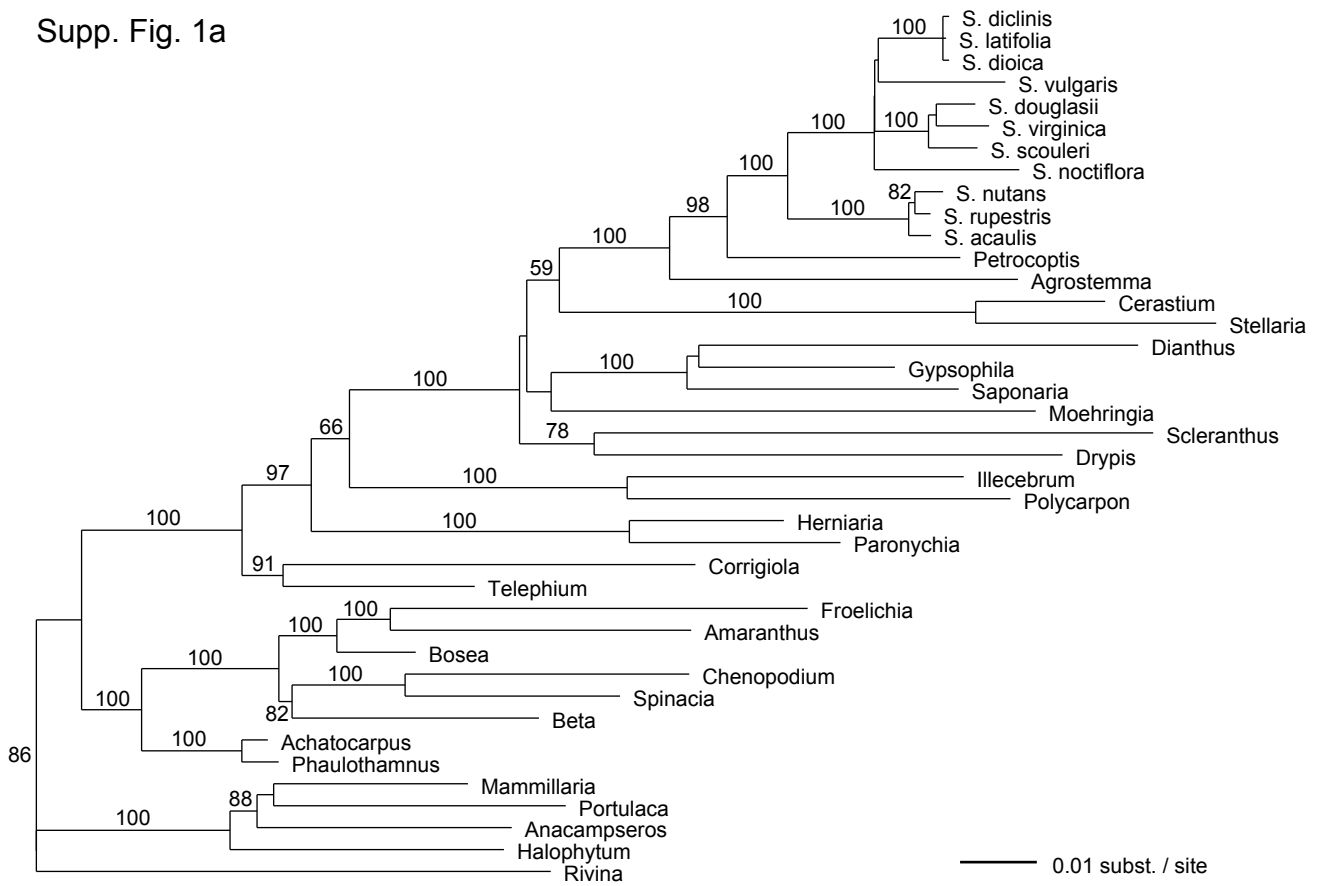

Supp. Fig. 1b

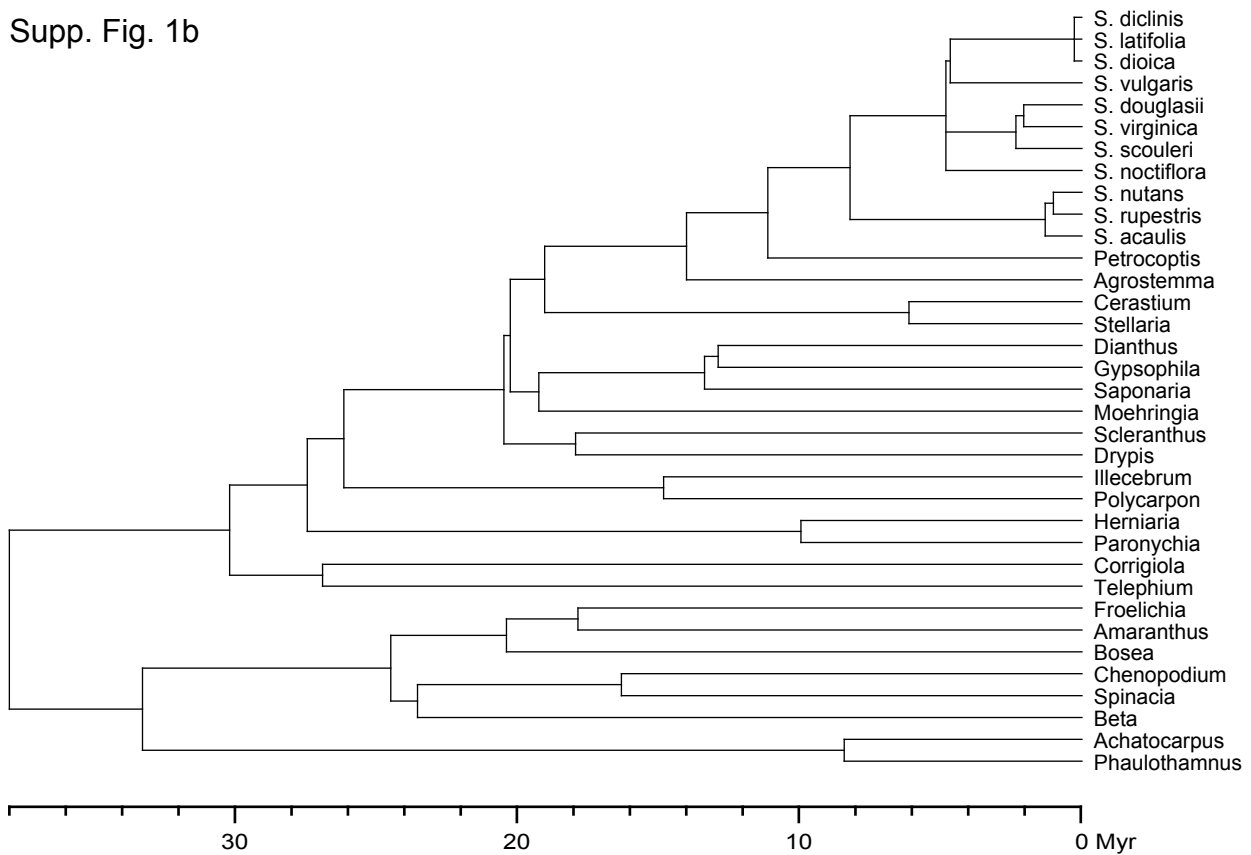

Supp. Fig. 2

**atp1**

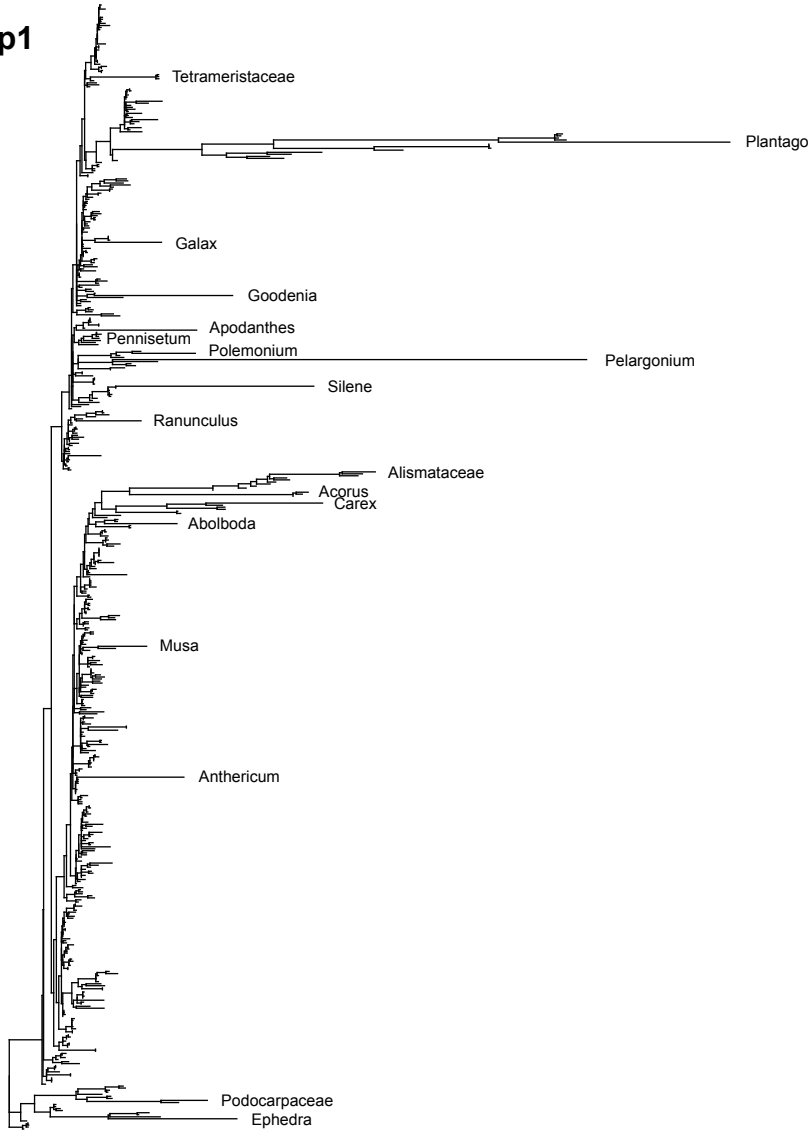

**matR**

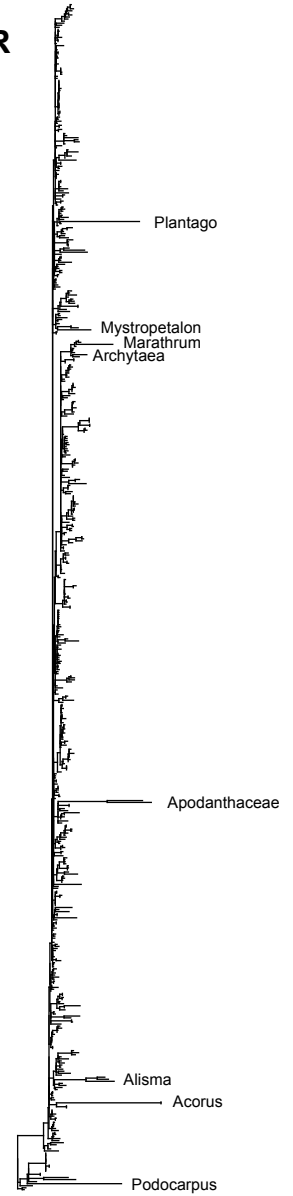

**cox1**

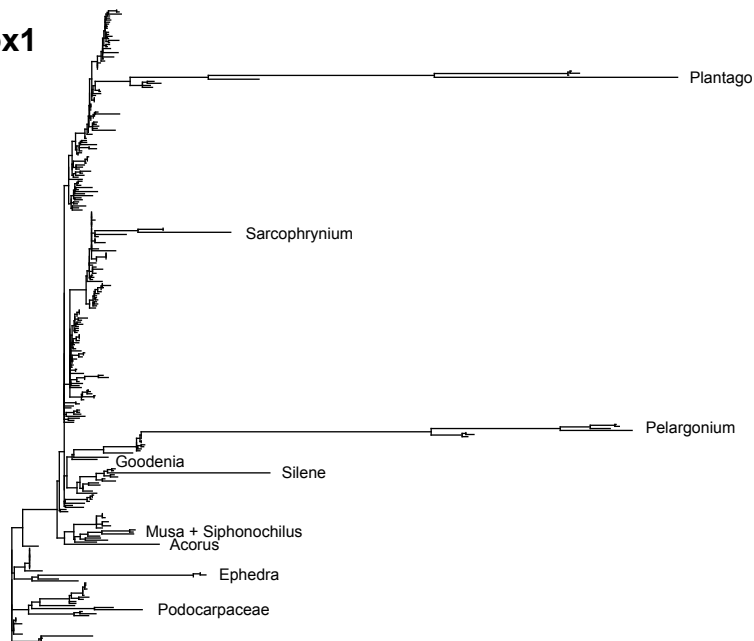

— 0.1 subs. / site

Supp. Fig. 3

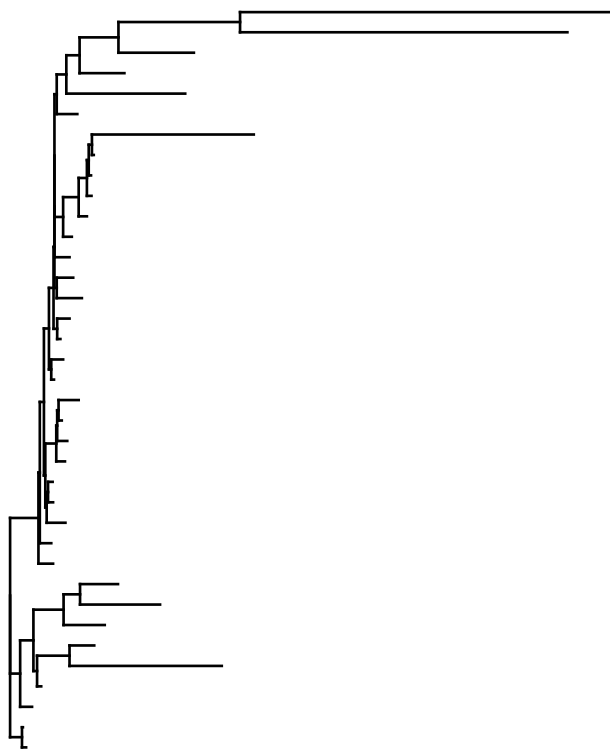

— 0.1 subs. / site

Pelargonium  
P. rugelii  
P. lanceolata  
Erodium  
Acorus  
Arabidopsis  
S. noctiflora  
S. acaulis  
S. latifolia  
Stellaria  
Beta  
Nepenthes  
Nicotiana  
Pisum  
Oenothera  
Daucus  
Sambucus  
Mahonia  
Platanus  
Oryza  
Phoenix  
Eichhornia  
Philodendron  
Liriodendron  
Laurus  
Piper  
Amborella  
Nymphaea  
Juniperus  
Podocarpus  
Araucaria  
Gnetum  
Ephedra  
Pinus  
Ginkgo  
Cycas  
Zamia

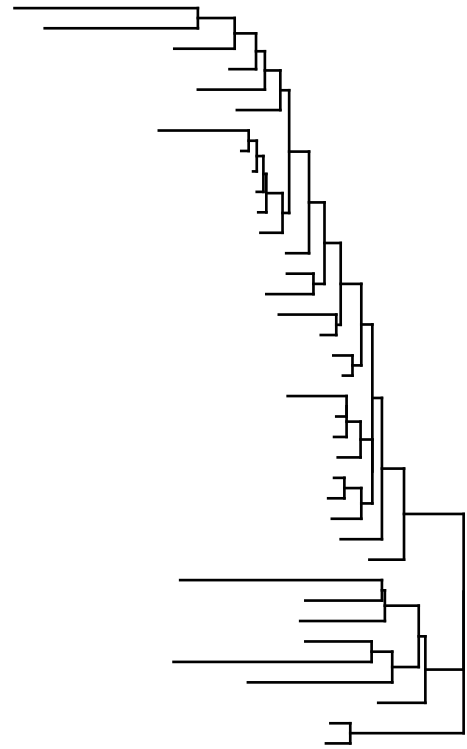

— 0.01 subs. / site

Supp. Fig. 4a

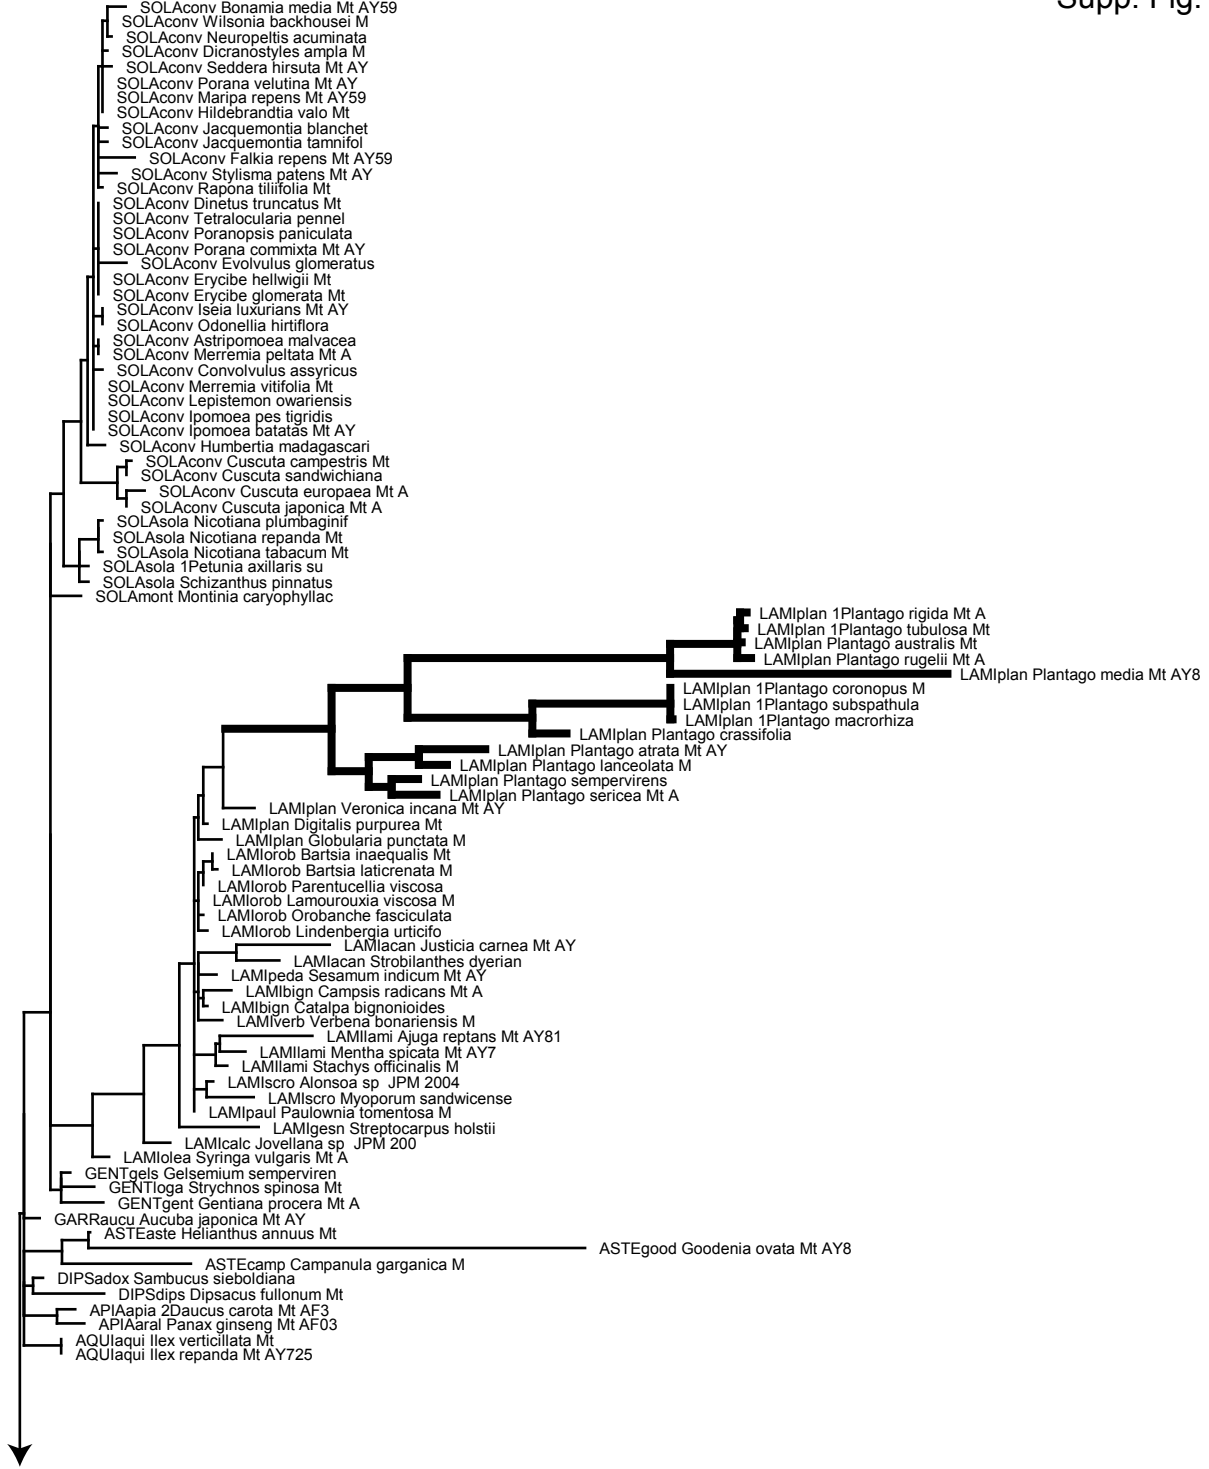

0.1 subs / site

Supp. Fig. 4b

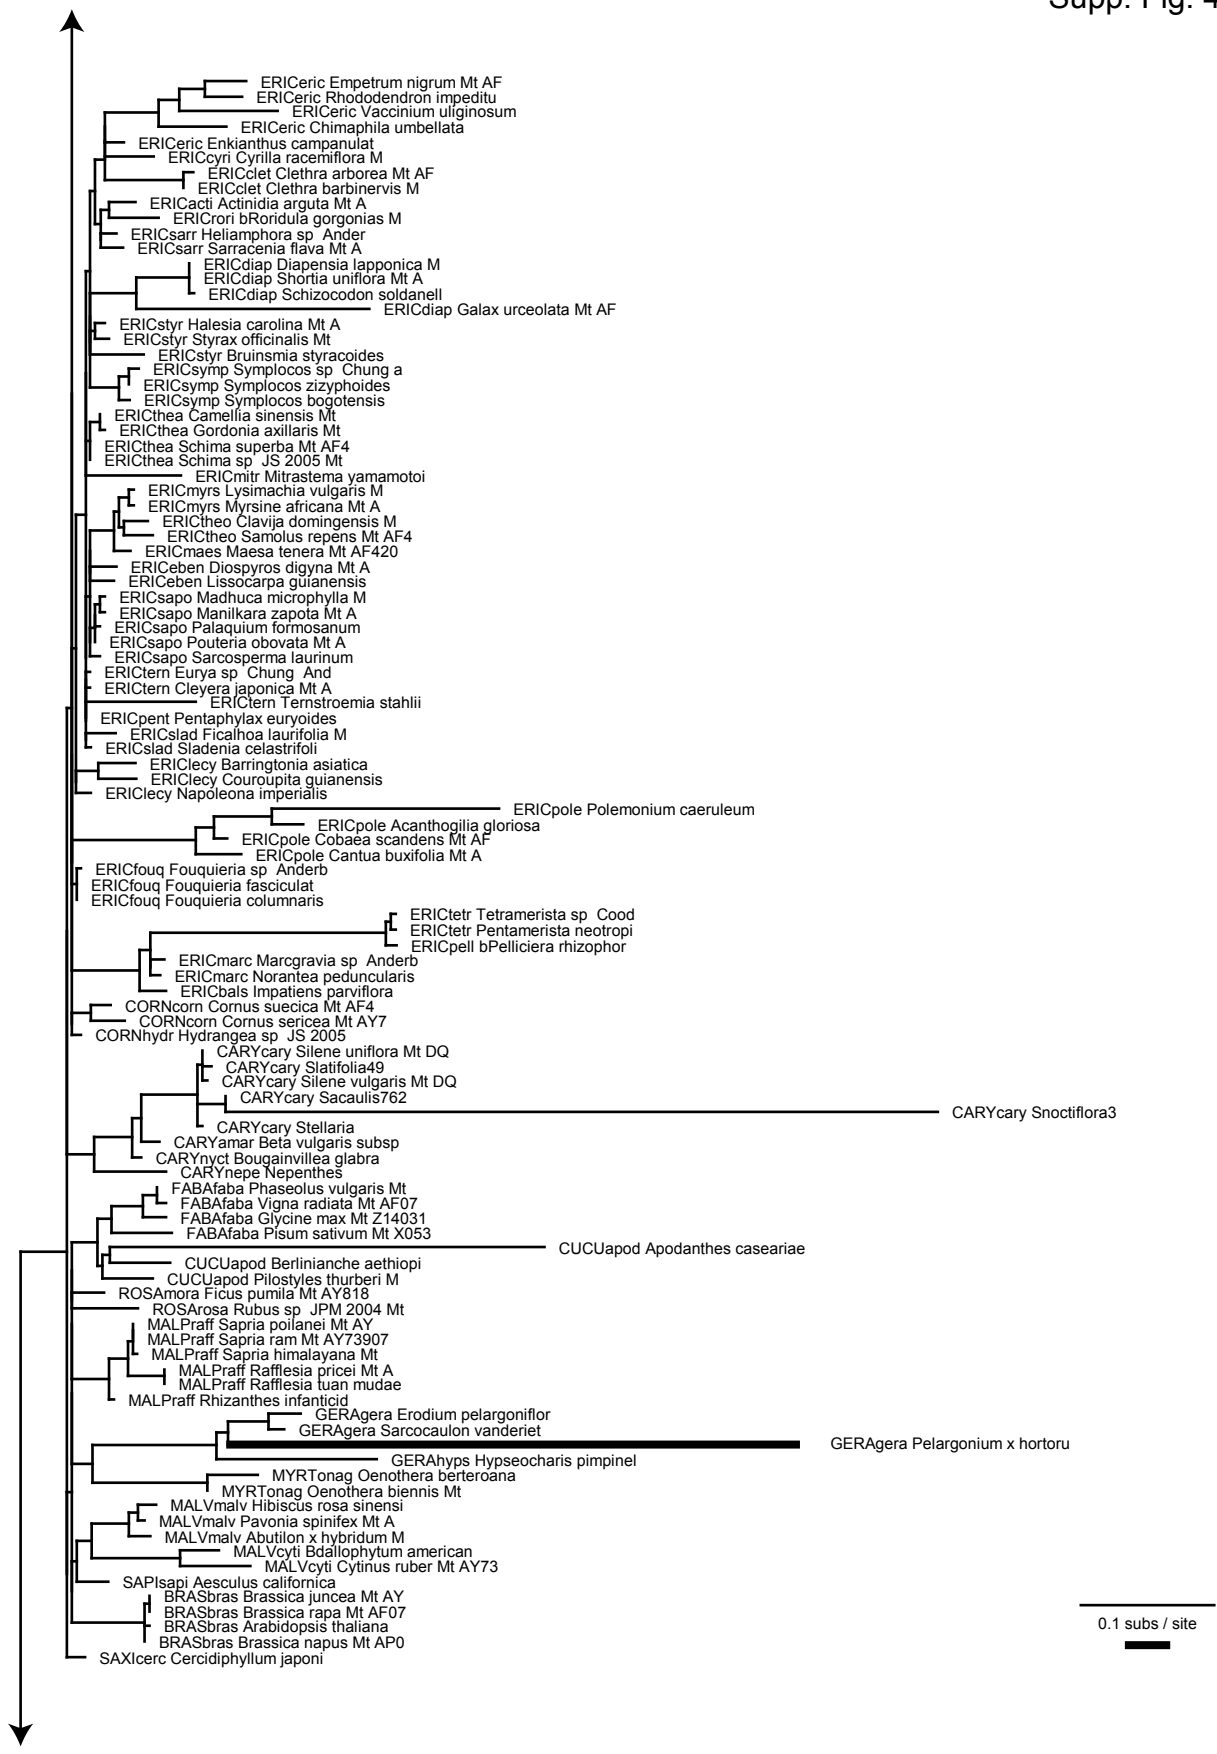

Supp. Fig. 4c

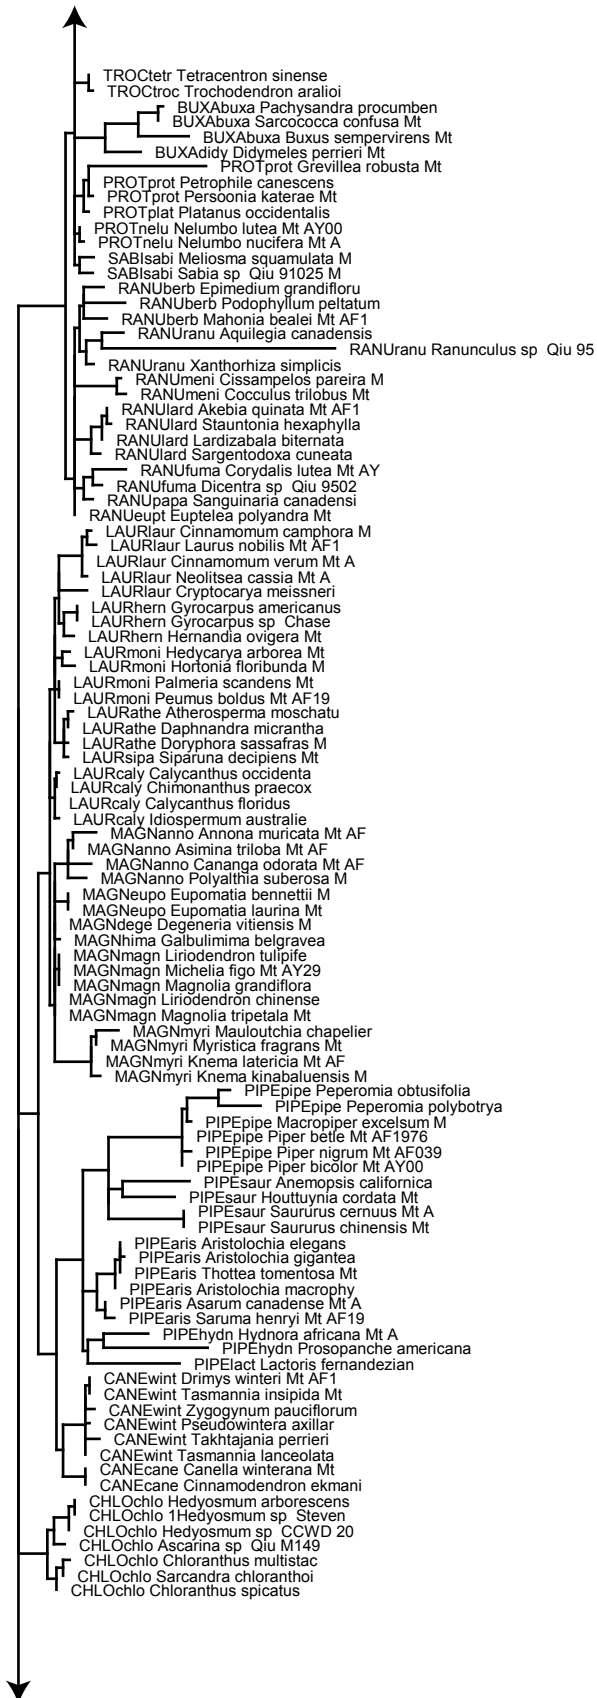

0.1 subs / site

Supp. Fig. 4d

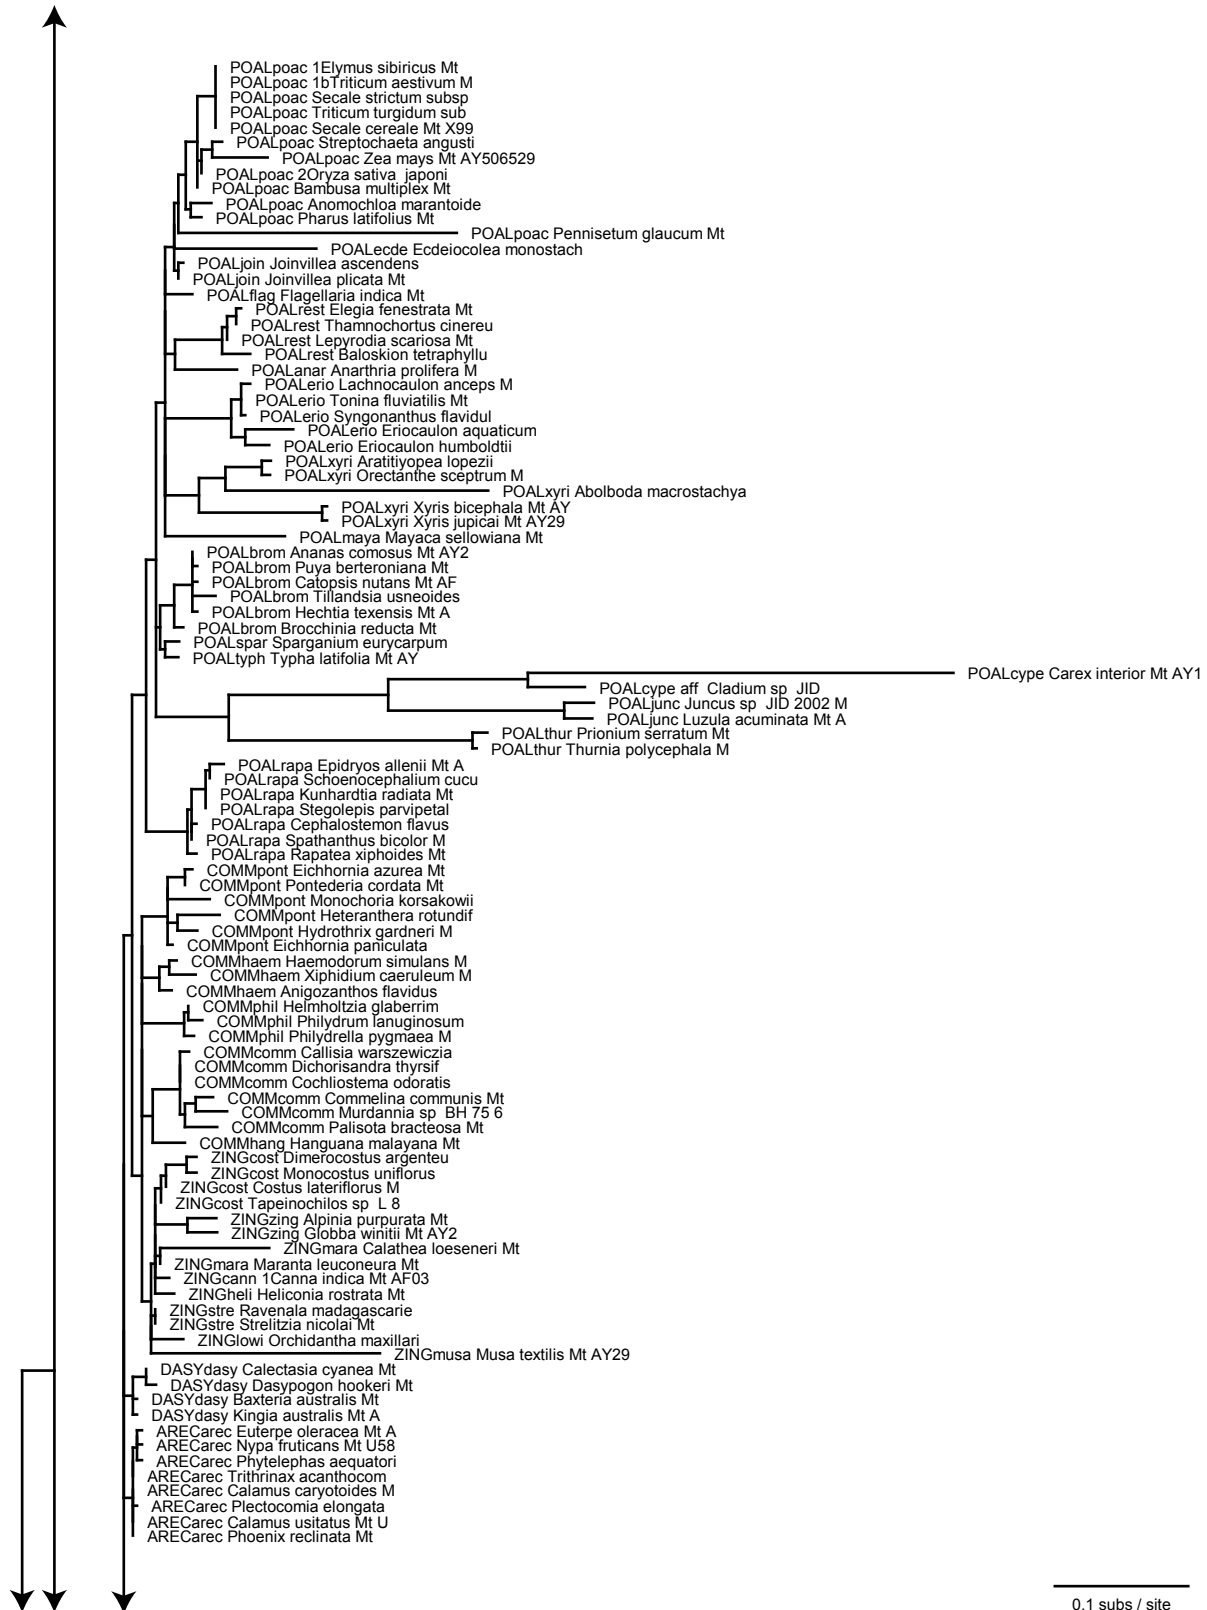



Supp. Fig. 4e

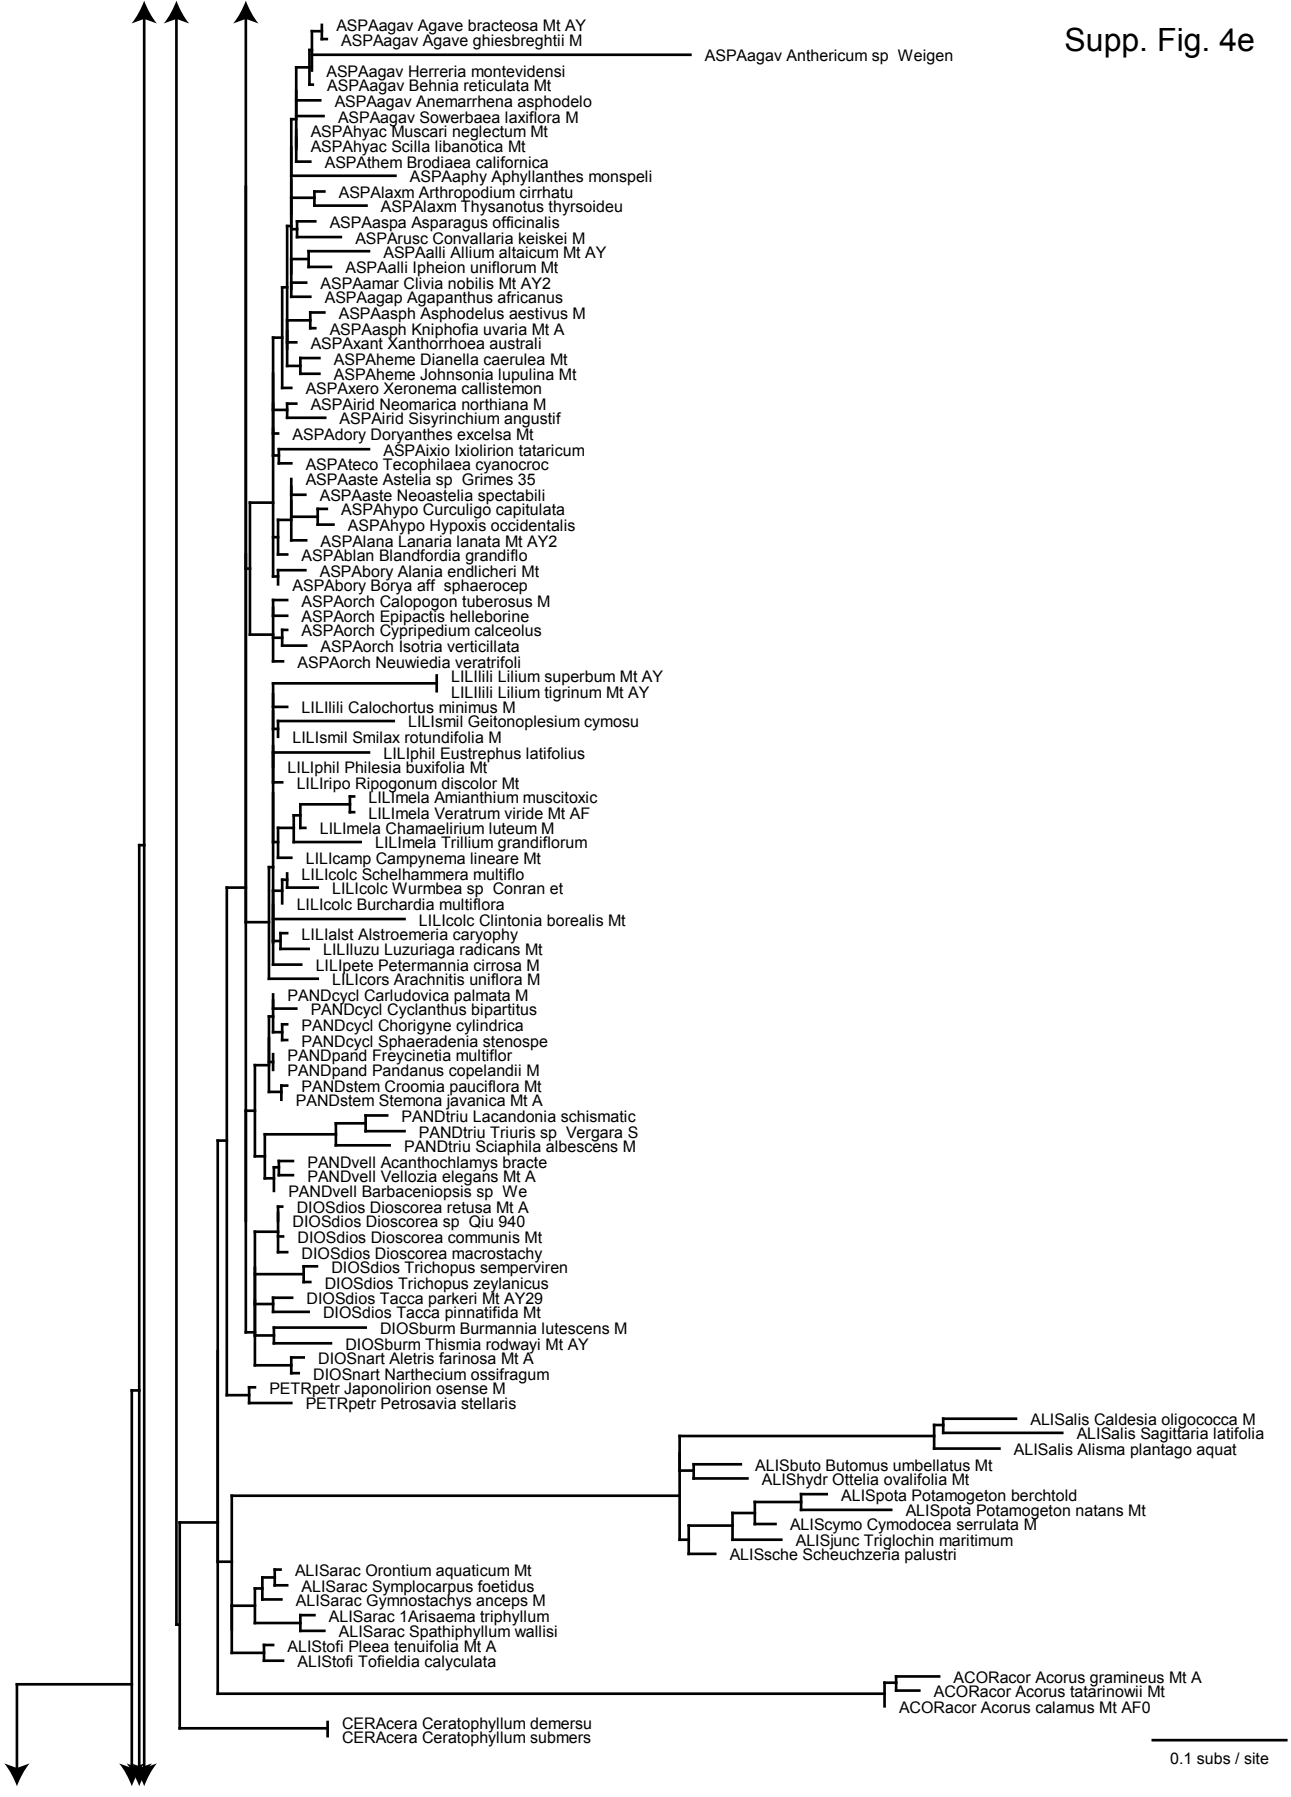

Supp. Fig. 4f

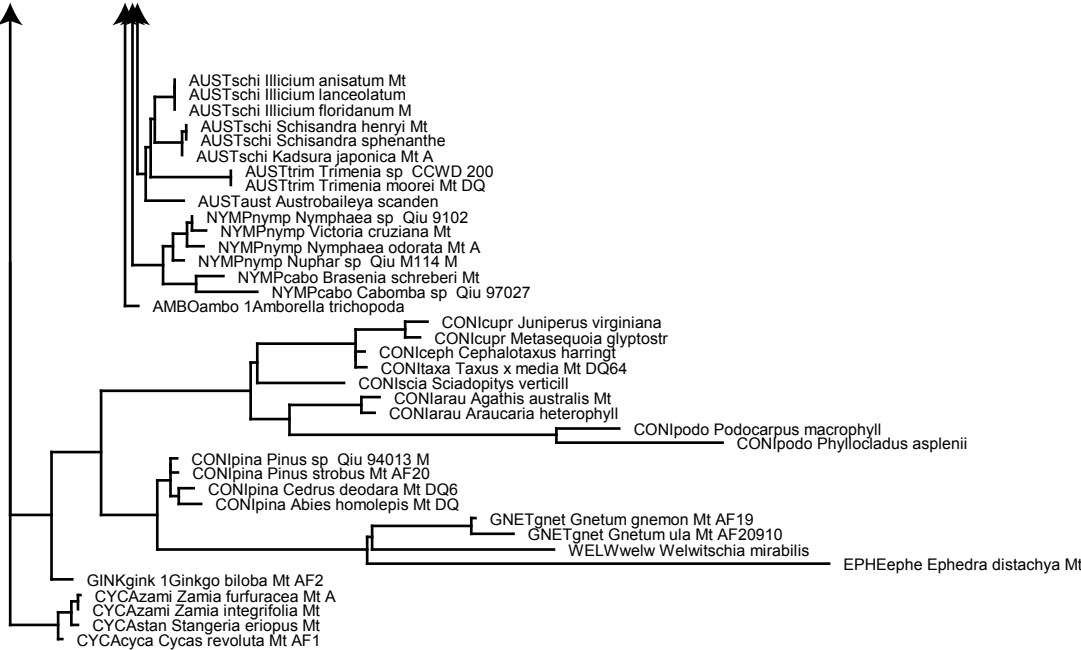

0.1 subs / site

Supp. Fig. 5a

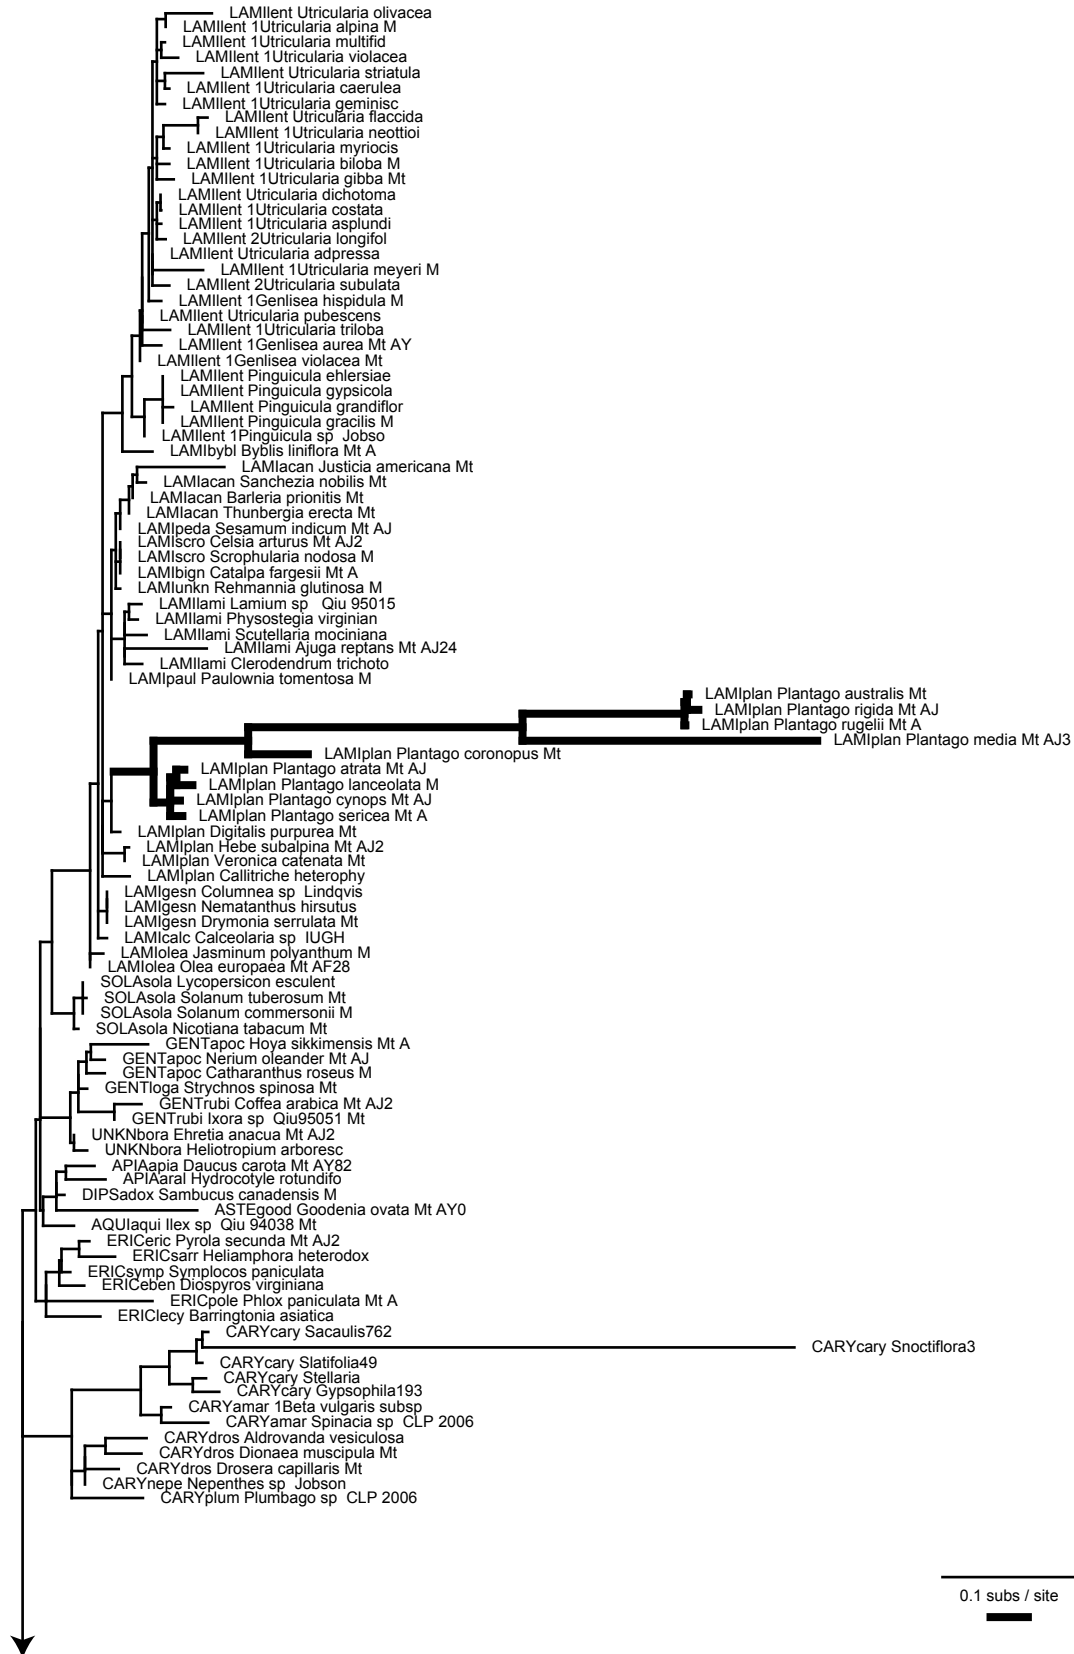

Supp. Fig. 5b

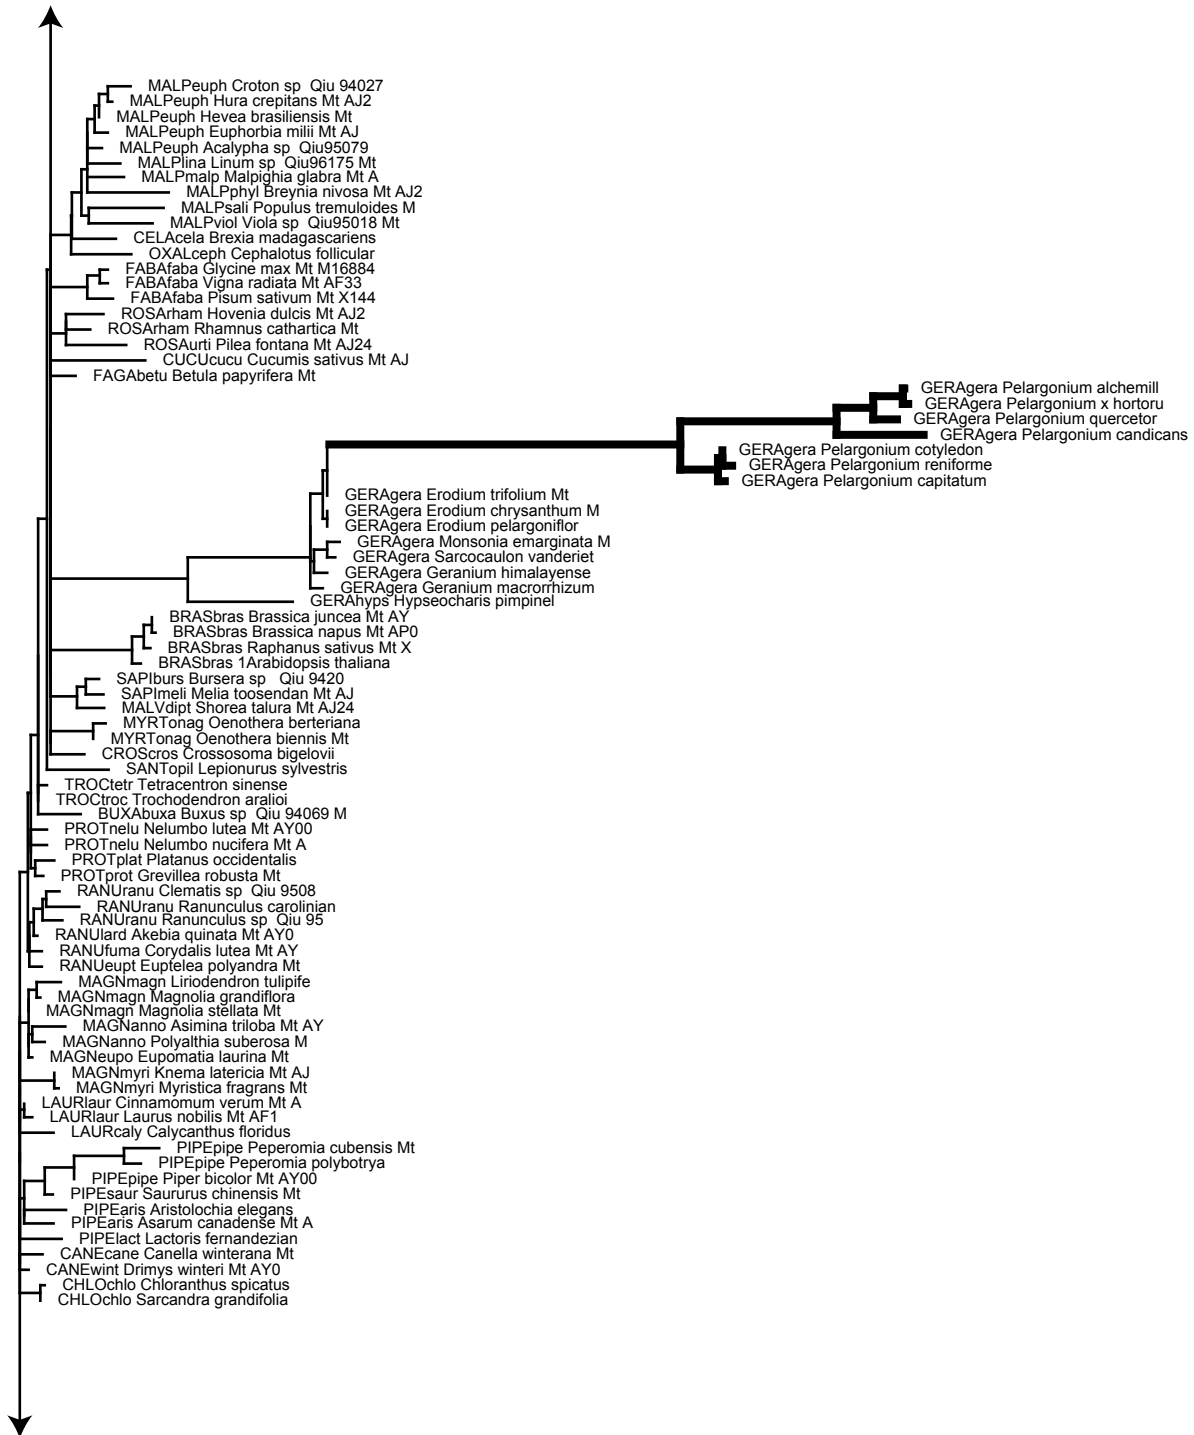

0.1 subs / site

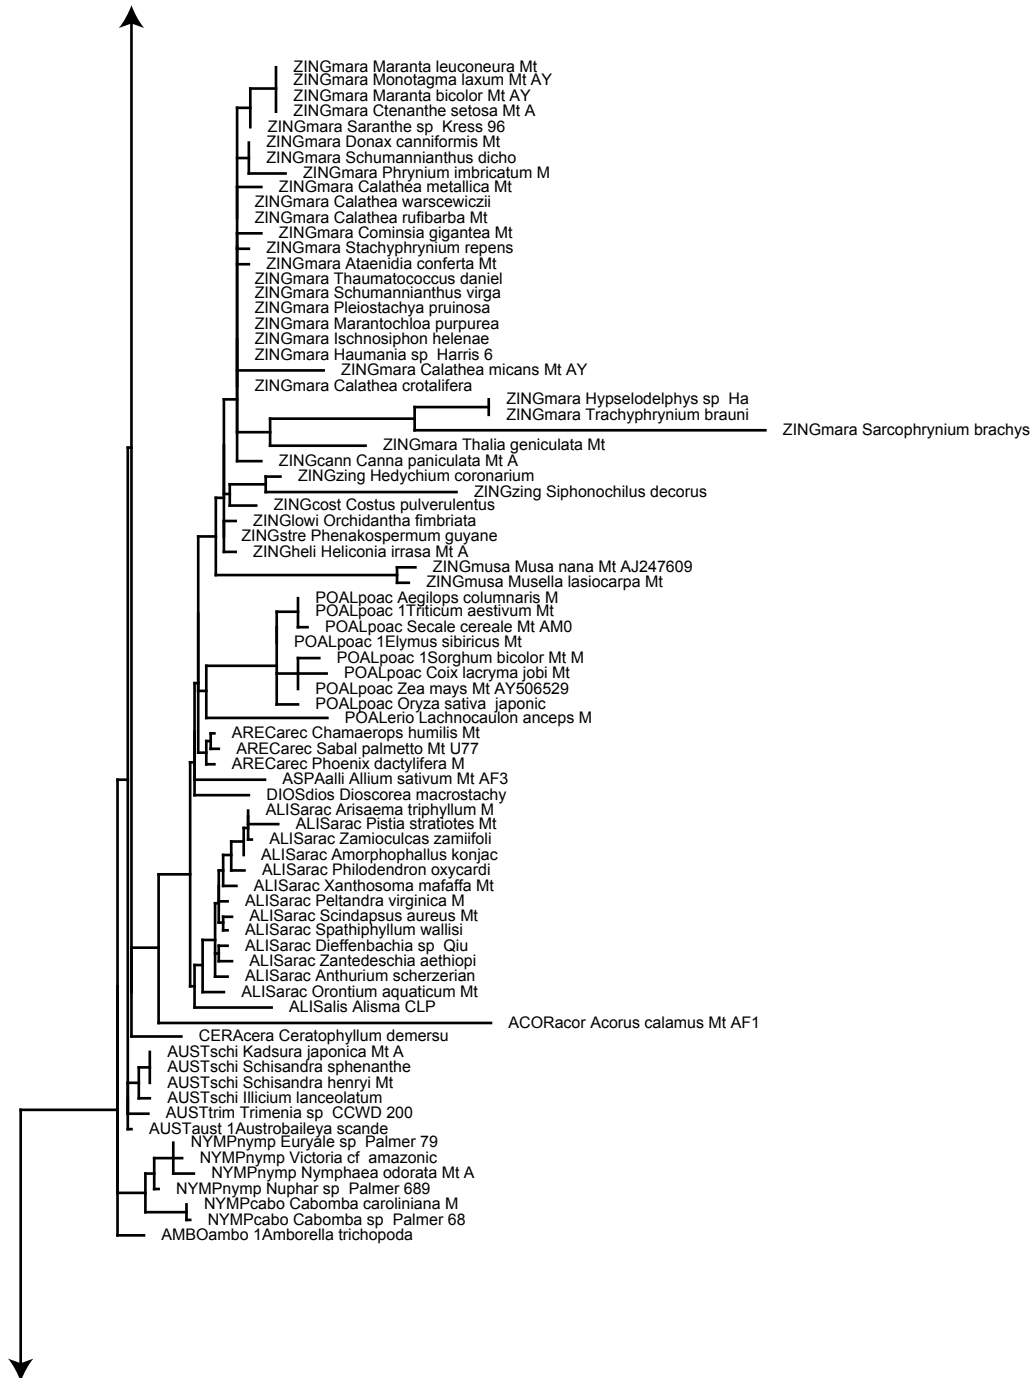

Supp. Fig. 5d

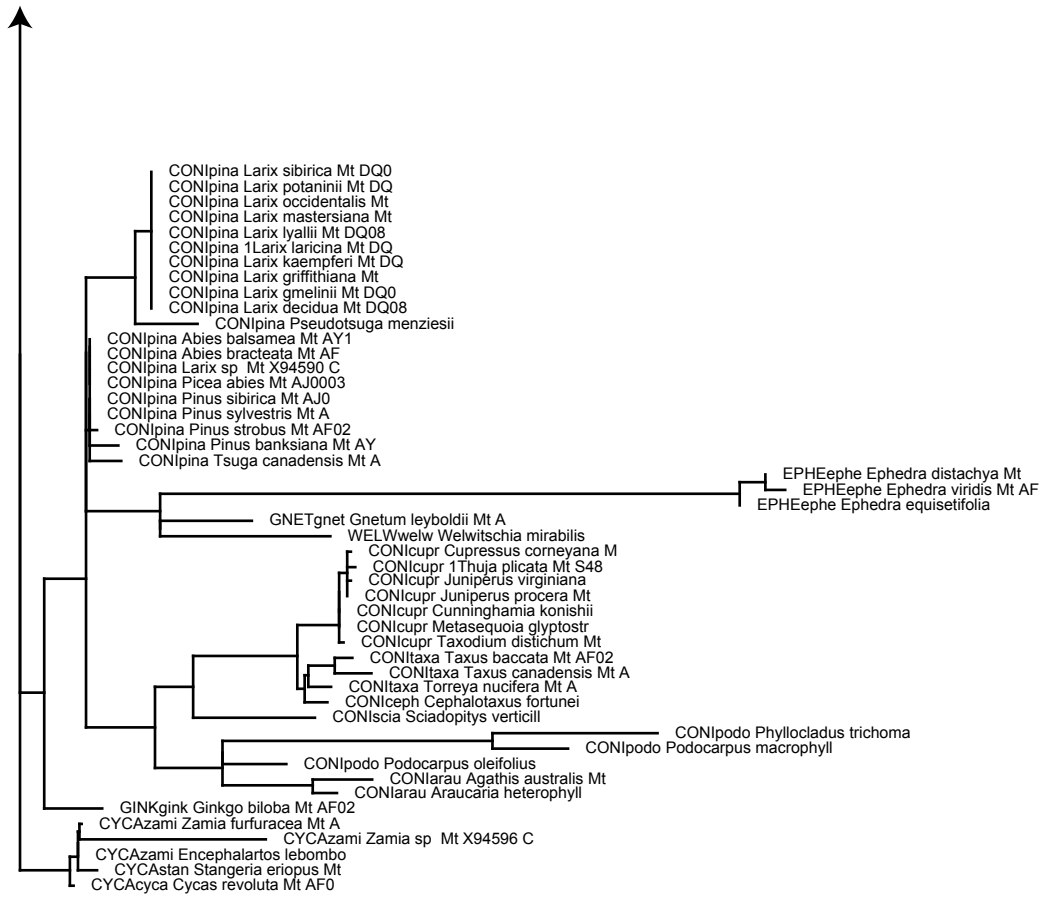

0.1 subs / site

Supp. Fig. 6a

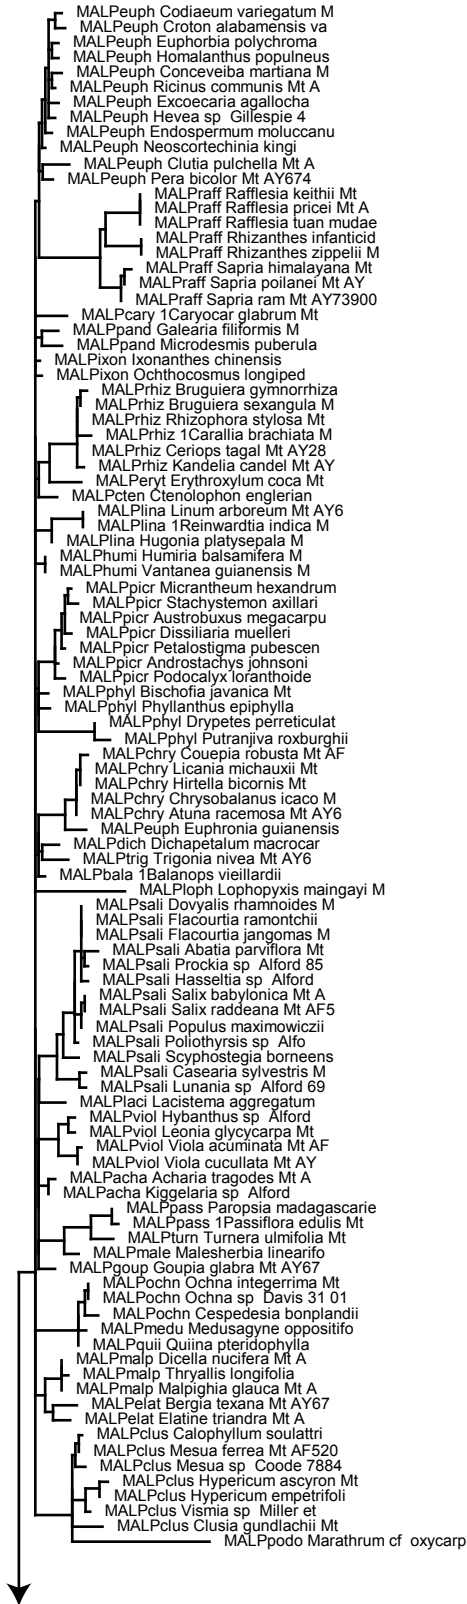

Supp. Fig. 6b

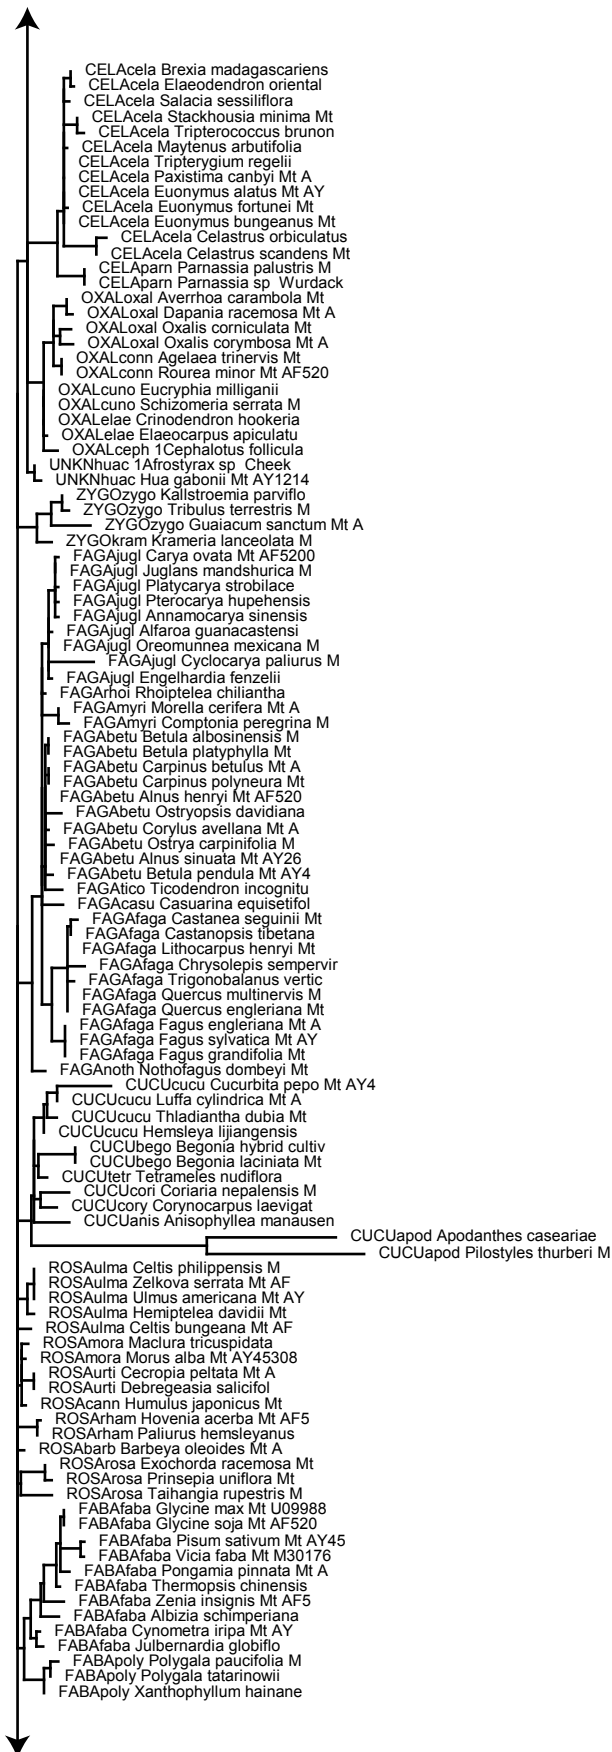

0.1 subs / site



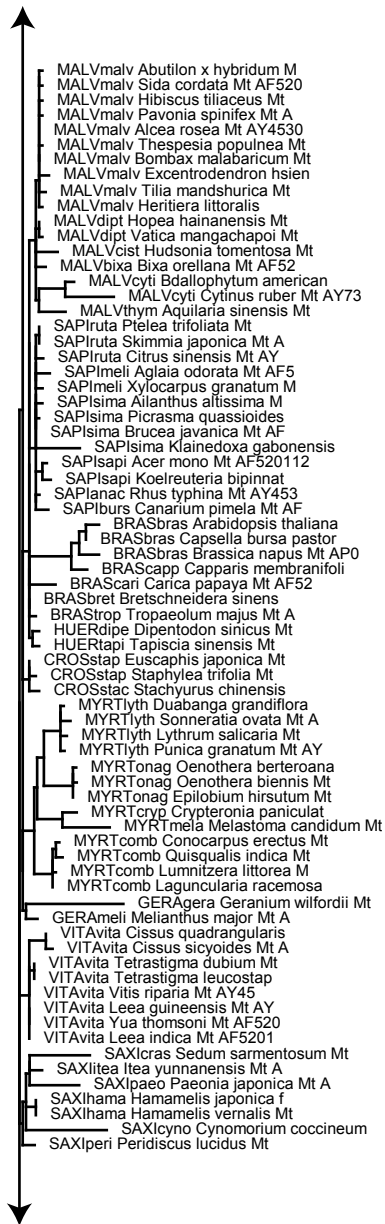

Supp. Fig. 6d

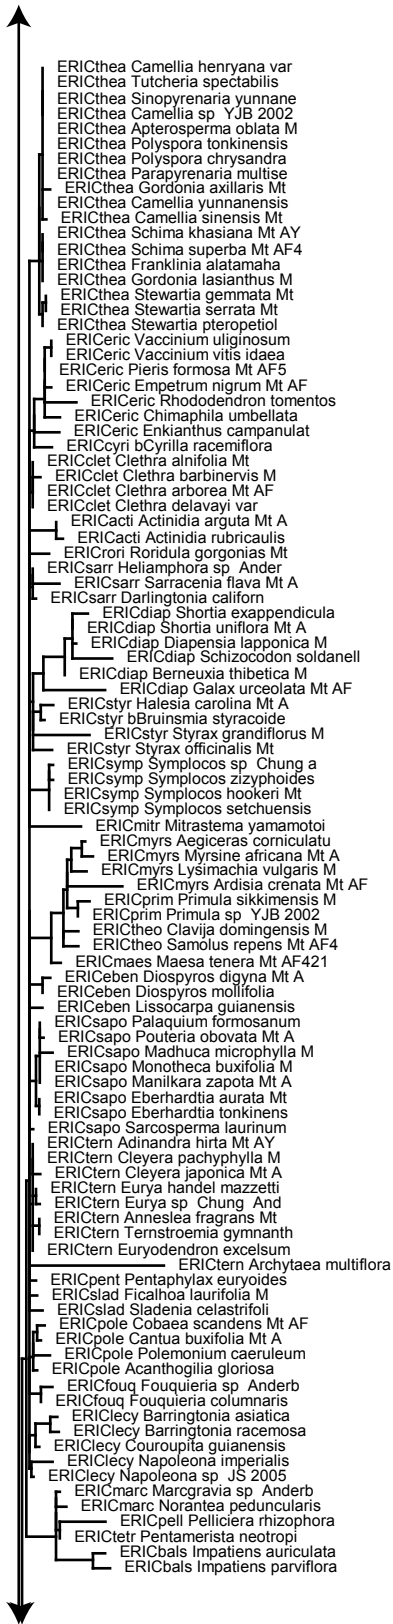

0.1 subs / site

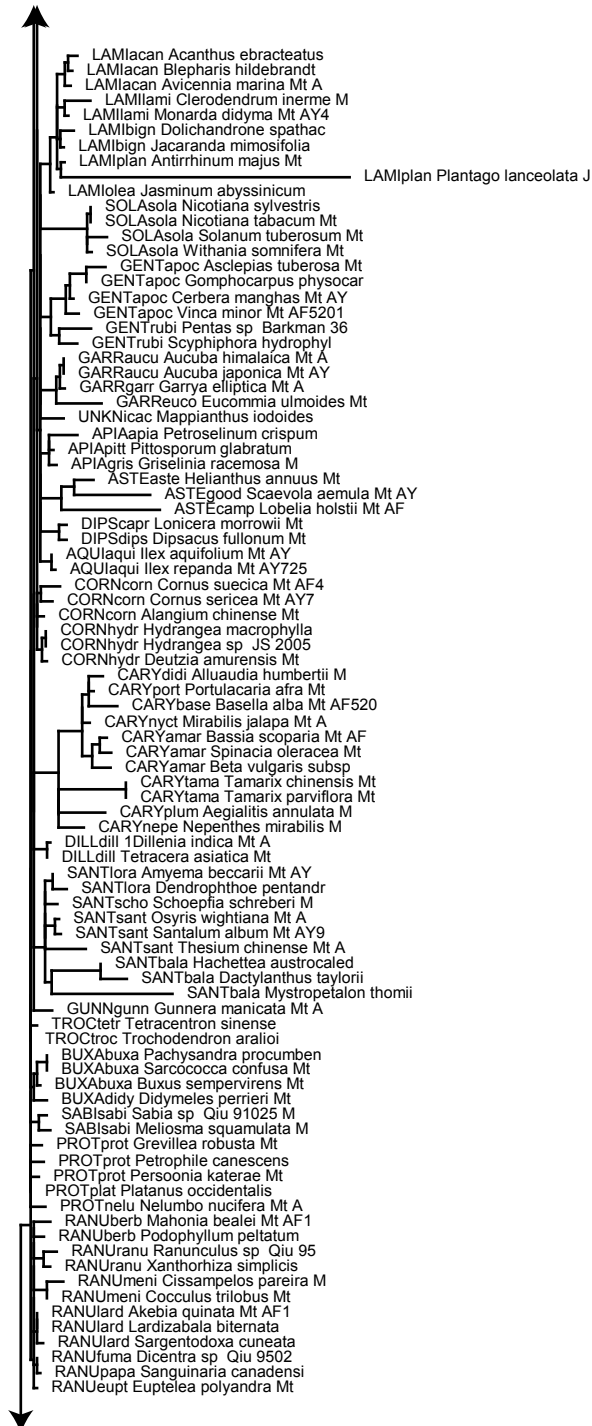

Supp. Fig. 6f

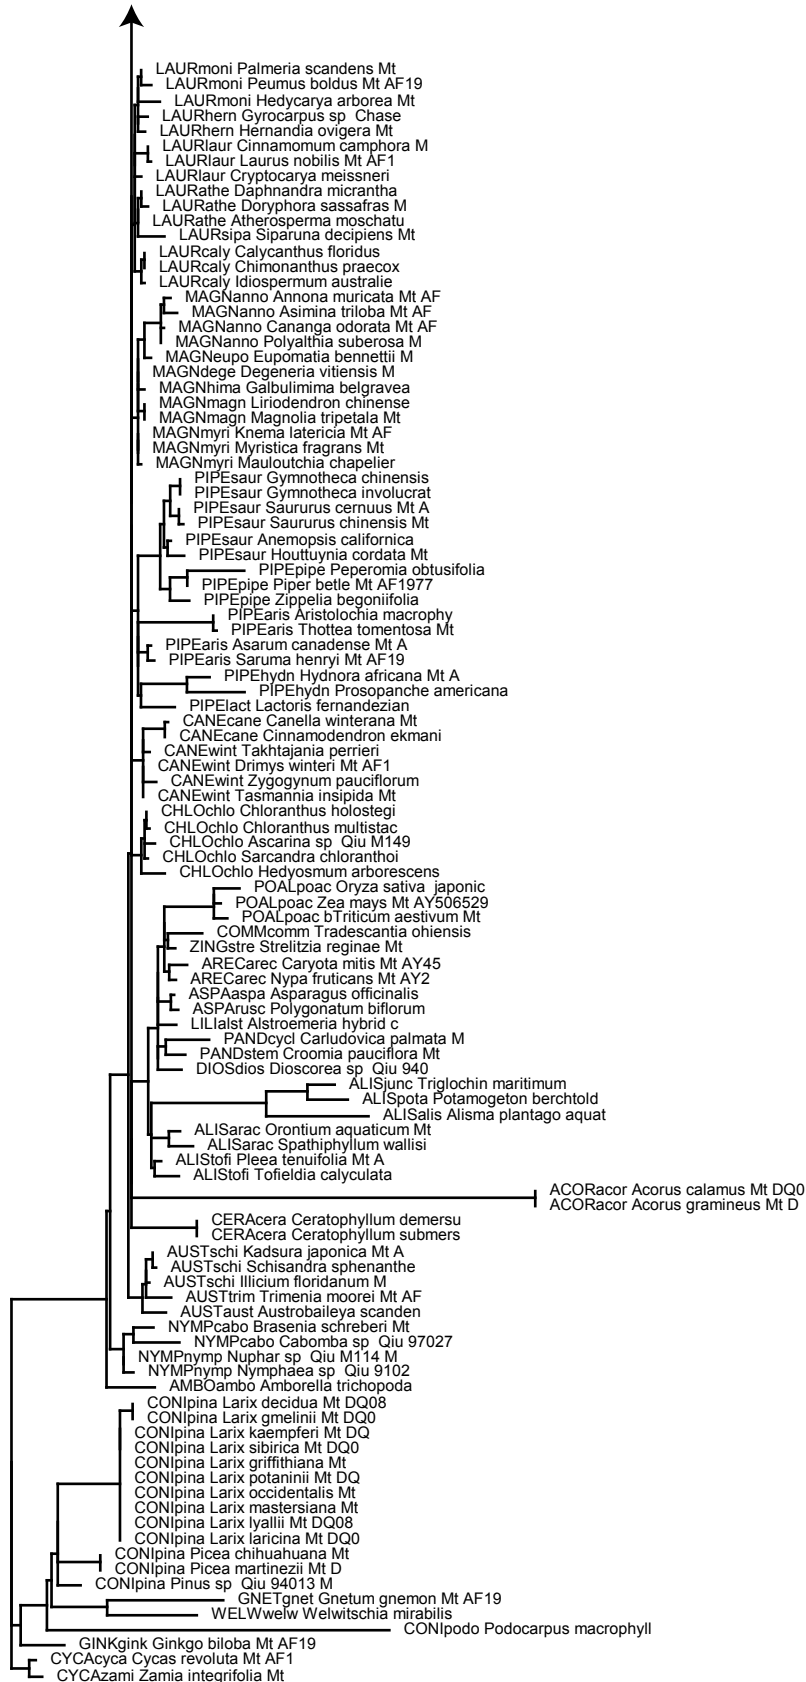

0.1 subs / site
