# Supplementary material for: Extensive variation in synonymous substitution rates in mitochondrial genes of seed plants
Source: PubMed Central journal article supplement (PMC1973135; doi:10.1186/1471-2148-7-135), 2007-08-09
Supplement: 1471-2148-7-135-S2.pdf [file 1471-2148-7-135-S2.pdf]

**Table S1. PCR and sequencing primers used in this study**

| <b>Forward Primers</b> |                            | <b>Reverse Primers</b> |                          |
|------------------------|----------------------------|------------------------|--------------------------|
| atp1-F1                | ACACGAATTTTCAAGTGGATGAGA   | atp1-R1                | ACCTCTATTGAGTAATGCCTGAGT |
| atp1-F4                | TGTCTATGTAGCGRTTGGACAG     | atp1-R3                | TCTAGTGGCATTTCGATCACAGAA |
|                        |                            | atp1-R4                | GTSGCTGCTACAAGAATGGAAT   |
| cob-UB1                | ACTATAAGRAACCAACGRYTM      | cob-UB3                | GATCCATATTGATGCAATGCC    |
| cob-UB2                | AGGCGCCAGTCTTCTTGATCTGG    | cob-UB4                | AATTCCTCTTCSAACTCGTCC    |
| cob-F1                 | AGCATTTGATAGATTATCCAACC    | cob-R717               | GATGCCCCAAAACATTAGGA     |
| cob-F362               | TTGGGGTCAGATGAGCTTTT       | cob-R1084              | ATTCTTCTTCCAACCTCGTCC    |
| cox1-UB1               | AYGAMAAATCYGGTYCGATGG      | cox1-UB4               | ACCGRATCCAGGCAGAATGRG    |
| cox1-UB3               | CATCTCTTYTGTTCTTCGGT       | cox1-UB6               | AGCTGGAAGTTCTCCAAAAGT    |
| cox1-F1                | GGAGCAGTTGATTAGCCAT        | cox1-R663              | CCCAGAATTTGCCAGGACTA     |
| cox1-F473              | TTGATACCCGCGCTTACTTC       | cox1-R1077             | CCATTCCAGTGTGGGTGAAT     |
| cox2-UB1               | TTGTGATGCWGC GAACCR TG     | cox2-UB7               | ACHGCTTCTACGACGATAGR     |
| cox2-UB2               | TGAGTATTC D GACTATAACAR    |                        |                          |
| cox3-UB1               | ATGATTGAATCTCARAGGCAY      | cox3-UB2               | TCATATACCTCCCCACCAA      |
| LSU-UB1                | GTTAGTAGCGGCGAGCGAGAG      | LSU-UB6                | TTCGGGTCAAATAGGAAGAAC    |
| LSU-UB2                | CACTCACTCTAACGGCGTACC      | LSU-UB7                | TTCCACTGGCAGGCGATCGTG    |
| LSU-UB3                | TGGAGATATCAGAAGTGAGAA      | LSU-UB8                | TYSTTGACTATGACAASAGTC    |
| LSU-UB4                | CCTRCCATAGTCGCGAGKMT       | LSU-UB9                | AGAGTGGTCTTTCAGGATTGG    |
| matK-F1                | GTA CT CGGCTTTTAAGTGCG     | matK-R1                | GCACACGGCTTTCCCTATG      |
| matK-F2                | CCTTGTTTTGACTGTATCGCMC     | matK-R2                | CCAGACCGACTTACTAATAGGATG |
| matK-F2b               | AACTAGAGGGTTCTTGGCAAC      | matK-R3                | CATCTCTTACCCAGTACCGAAG   |
| matK-F3                | GCCCATCTAGAAATCTTGGTTC     | matK-R3b               | GCGAATAAAAATTGYGTTTGTGC  |
| matK-F3b               | AATTTYCATGTATGTGAATACGAATC | matK-R4                | TGCGATACAGTCAAACARGG     |
| matK-F4                | CAATTTTGTAACCGATTAGGACATC  | matK-R4b               | GGTAAATTCATCARCGGACTCTC  |
| SSU-UB1                | GAGTTTGATCCTGGCTCAGAA      | SSU-UB5                | TTCCACTCTCCTCTGTCTCAC    |
| SSU-UB2                | AGGGCACGTAGGCGGTGAATC      | SSU-UB6                | CATGTCTSAGCAACACAARAC    |
| SSU-UB3                | TCGTCAGCTCGTGTGCGTGAGA     | SSU-UB7                | CCACCTTCTCCMGTATMTCA     |

**Table S2. Taxon information for figure 1**

| Asterids     |                  |                               |          |
|--------------|------------------|-------------------------------|----------|
| Apiales      | Apiaceae         | Daucus_carota                 | AF301604 |
| Apiales      | Araliaceae       | Panax_ginseng                 | AF034118 |
| Aquifoliales | Aquifoliaceae    | Ilex_repanda                  | AY725899 |
| Aquifoliales | Aquifoliaceae    | Ilex_verticillata             | AY741812 |
| Asterales    | Asteraceae       | Helianthus_annuus             | X52838   |
| Asterales    | Campanulaceae    | Campanula_garganica           | AY741815 |
| Asterales    | Goodeniaceae     | Goodenia_ovata                | AY818934 |
| Cornales     | Cornaceae        | Cornus_sericea                | AY725897 |
| Cornales     | Cornaceae        | Cornus_suecica                | AF420915 |
| Cornales     | Hydrangeaceae    | Hydrangea_sp._JS-2005         | AY725896 |
| Dipsacales   | Adoxaceae        | Sambucus_sieboldiana          | AY741813 |
| Dipsacales   | Dipsacaceae      | Dipsacus_fullonum             | AY741814 |
| Ericales     | Actinidiaceae    | Actinidia_arguta              | AF420916 |
| Ericales     | Balsaminaceae    | Impatiens_parviflora          | AF420933 |
| Ericales     | Clethraceae      | Clethra_arborea               | AF420919 |
| Ericales     | Clethraceae      | Clethra_barbinervis           | AF420920 |
| Ericales     | Cyrtaceae        | Cyrtilla_racemiflora          | AF420922 |
| Ericales     | Diapensiaceae    | Diapensia_lapponica           | AF420923 |
| Ericales     | Diapensiaceae    | Galax_urceolata               | AF420929 |
| Ericales     | Diapensiaceae    | Schizocodon_soldanelloides    | AF420949 |
| Ericales     | Diapensiaceae    | Shortia_uniflora              | AY725915 |
| Ericales     | Ebenaceae        | Diospyros_digyna              | AF420924 |
| Ericales     | Ebenaceae        | Lissocarpa_guianensis         | AF420934 |
| Ericales     | Ericaceae        | Chimaphila_umbellata          | AF420917 |
| Ericales     | Ericaceae        | Empetrum_nigrum               | AF420925 |
| Ericales     | Ericaceae        | Enkianthus_campanulatus       | AF420926 |
| Ericales     | Ericaceae        | Rhododendron_impeditum        | AY725911 |
| Ericales     | Ericaceae        | Vaccinium_uliginosum          | AF420953 |
| Ericales     | Fouquieriaceae   | Fouquieria_columnaris         | AY725902 |
| Ericales     | Fouquieriaceae   | Fouquieria_fasciculata        | AY725903 |
| Ericales     | Fouquieriaceae   | Fouquieria_sp._Anderberg_s.n. | AF420928 |
| Ericales     | Lecythidaceae    | Barringtonia_asiatica         | AY725906 |
| Ericales     | Lecythidaceae    | Couropita_guianensis          | AY725907 |
| Ericales     | Lecythidaceae    | Napoleona_imperialis          | AF420960 |
| Ericales     | Maesaceae        | Maesa_tenera                  | AF420937 |
| Ericales     | Marcgraviaceae   | Marcgravia_sp._Anderberg_s.n. | AF420939 |
| Ericales     | Marcgraviaceae   | Norantea_peduncularis         | AF420941 |
| Ericales     | Mitrastemonaceae | Mitrastema_yamamotoi          | AY739068 |
| Ericales     | Myrsinaceae      | Lysimachia_vulgaris           | AF420935 |
| Ericales     | Myrsinaceae      | Myrsine_africana              | AF420940 |
| Ericales     | Pellicieraceae   | Pelliciera_rhizophorae        | AY725900 |
| Ericales     | Pentaphragmaceae | Pentaphragma_euryoides        | AF419242 |
| Ericales     | Polemoniaceae    | Acanthogilia_gloriosa         | AY725904 |
| Ericales     | Polemoniaceae    | Cantua_buxifolia              | AY725905 |
| Ericales     | Polemoniaceae    | Cobaea_scandens               | AF420921 |
| Ericales     | Polemoniaceae    | Polemonium_caeruleum          | AF420944 |
| Ericales     | Sapotaceae       | Madhuca_microphylla           | AF420936 |
| Ericales     | Sapotaceae       | Manilkara_zapota              | AF420938 |
| Ericales     | Sapotaceae       | Palaquium_formosanum          | AF420942 |
| Ericales     | Sapotaceae       | Planchonella_obovata          | AF420945 |
| Ericales     | Sapotaceae       | Roridula_gorgonias            | AY725910 |
| Ericales     | Sapotaceae       | Sarcosperma_laurinum          | AF420956 |
| Ericales     | Sarraceniaceae   | Heliophora_sp._Anderberg_s.n. | AF420932 |
| Ericales     | Sarraceniaceae   | Sarracenia_flava              | AF420947 |
| Ericales     | Sladeniaceae     | Ficalhoa_laurifolia           | AF420955 |
| Ericales     | Sladeniaceae     | Sladenia_celastrifolia        | AF420959 |

|             |                  |                                        |          |
|-------------|------------------|----------------------------------------|----------|
| Ericales    | Styracaceae      | Bruinsmia_styracoides                  | AY725914 |
| Ericales    | Styracaceae      | Halesia_carolina                       | AF420931 |
| Ericales    | Styracaceae      | Styrax_officinalis                     | AF420950 |
| Ericales    | Symplocaceae     | Symplocos_bogotensis                   | AF420951 |
| Ericales    | Symplocaceae     | Symplocos_sp._Chung_and_Anderberg_1351 | AF420954 |
| Ericales    | Symplocaceae     | Symplocos_zizyphoides                  | AY725913 |
| Ericales    | Ternstroemiaceae | Cleyera_japonica                       | AY725908 |
| Ericales    | Ternstroemiaceae | Eurya_sp._Chung_&_Anderberg_1406       | AF420927 |
| Ericales    | Ternstroemiaceae | Ternstroemia_stahlia                   | AY725909 |
| Ericales    | Tetrameristaceae | Pentamerista_neotropica                | AY725901 |
| Ericales    | Tetrameristaceae | Tetramerista_sp._Coode_7925            | AF420958 |
| Ericales    | Theaceae         | Camellia_sinensis                      | AF420952 |
| Ericales    | Theaceae         | Gordonia_axillaris                     | AF420930 |
| Ericales    | Theaceae         | Schima_sp._JS-2005                     | AY725912 |
| Ericales    | Theaceae         | Schima_superba                         | AF420948 |
| Ericales    | Theophrastaceae  | Clavija_domingensis                    | AF420918 |
| Ericales    | Theophrastaceae  | Samolus_repens                         | AF420946 |
| Garryales   | Aucubaceae       | Aucuba_japonica                        | AY725898 |
| Gentianales | Gelsemiaceae     | Gelsemium sempervirens                 | AY741816 |
| Gentianales | Gentianaceae     | Gentiana_procera                       | AY741817 |
| Gentianales | Loganiaceae      | Strychnos_spinosa                      | AY741818 |
| Lamiales    | Acanthaceae      | Justicia_carnea                        | AY741824 |
| Lamiales    | Acanthaceae      | Strobilanthes_dyeriana                 | AY741825 |
| Lamiales    | Bignoniaceae     | Campsis_radicans                       | AY741839 |
| Lamiales    | Bignoniaceae     | Catalpa_bignonioides                   | AY741840 |
| Lamiales    | Calceolariaceae  | Jovellana_sp._JPM-2004                 | AY741822 |
| Lamiales    | Gesneriaceae     | Streptocarpus_holstii                  | AY741823 |
| Lamiales    | Lamiaceae        | Ajuga_reptans                          | AY818931 |
| Lamiales    | Lamiaceae        | Mentha_spicata                         | AY741835 |
| Lamiales    | Lamiaceae        | Stachys_officinalis                    | AY741836 |
| Lamiales    | Oleaceae         | Syringa_vulgaris                       | AY741821 |
| Lamiales    | Orobanchaceae    | Bartsia_inaequalis                     | AY741832 |
| Lamiales    | Orobanchaceae    | Bartsia_laticrenata                    | AY741833 |
| Lamiales    | Orobanchaceae    | Lamourouxia_viscosa                    | AY741830 |
| Lamiales    | Orobanchaceae    | Lindenbergia_urticifolia               | AY741829 |
| Lamiales    | Orobanchaceae    | Orobanche_fasciculata                  | AY741831 |
| Lamiales    | Orobanchaceae    | Parentucellia_viscosa                  | AY741834 |
| Lamiales    | Paulowniaceae    | Paulownia_tomentosa                    | AY741826 |
| Lamiales    | Pedaliaceae      | Sesamum_indicum                        | AY741827 |
| Lamiales    | Plantaginaceae   | Digitalis_purpurea                     | AY741841 |
| Lamiales    | Plantaginaceae   | Globularia_punctata                    | AY741842 |
| Lamiales    | Plantaginaceae   | Plantago_atrata                        | AY818936 |
| Lamiales    | Plantaginaceae   | Plantago_australis                     | AY741847 |
| Lamiales    | Plantaginaceae   | Plantago_coronopus                     | AY741843 |
| Lamiales    | Plantaginaceae   | Plantago_crassifolia                   | AY741844 |
| Lamiales    | Plantaginaceae   | Plantago_lanceolata                    | AY818937 |
| Lamiales    | Plantaginaceae   | Plantago_macrorhiza                    | AY741845 |
| Lamiales    | Plantaginaceae   | Plantago_media                         | AY818938 |
| Lamiales    | Plantaginaceae   | Plantago_rigida                        | AY741848 |
| Lamiales    | Plantaginaceae   | Plantago_rugelii                       | AY818939 |
| Lamiales    | Plantaginaceae   | Plantago sempervirens                  | AY818940 |
| Lamiales    | Plantaginaceae   | Plantago_sericea                       | AY818941 |
| Lamiales    | Plantaginaceae   | Plantago_subspathulata                 | AY741846 |
| Lamiales    | Plantaginaceae   | Plantago_tubulosa                      | AY741849 |
| Lamiales    | Plantaginaceae   | Veronica_incana                        | AY818943 |
| Lamiales    | Scrophulariaceae | Alonsoa_sp._JPM-2004                   | AY741837 |
| Lamiales    | Scrophulariaceae | Myoporum_sandwicense                   | AY741838 |
| Lamiales    | Verbenaceae      | Verbena_bonariensis                    | AY741828 |

|                |                 |                                  |          |
|----------------|-----------------|----------------------------------|----------|
| Solanales      | Convolvulaceae  | Astripomoea_malvacea             | AY596673 |
| Solanales      | Convolvulaceae  | Bonamia_media                    | AY596689 |
| Solanales      | Convolvulaceae  | Convolvulus_assyricus            | AY596678 |
| Solanales      | Convolvulaceae  | Cuscuta_campestris               | AY940733 |
| Solanales      | Convolvulaceae  | Cuscuta_europaea                 | AY596701 |
| Solanales      | Convolvulaceae  | Cuscuta_japonica                 | AY596702 |
| Solanales      | Convolvulaceae  | Cuscuta_sandwichiana             | AY741820 |
| Solanales      | Convolvulaceae  | Dicranostyles_ampla              | AY596694 |
| Solanales      | Convolvulaceae  | Dinetus_truncatus                | AY596699 |
| Solanales      | Convolvulaceae  | Erycibe_glomerata                | AY596697 |
| Solanales      | Convolvulaceae  | Erycibe_hellwigii                | AY596696 |
| Solanales      | Convolvulaceae  | Evolvulus_glomeratus             | AY596684 |
| Solanales      | Convolvulaceae  | Falkia_repens                    | AY596687 |
| Solanales      | Convolvulaceae  | Hildebrandtia_valo               | AY596682 |
| Solanales      | Convolvulaceae  | Humbertia_madagascariensis       | AY741819 |
| Solanales      | Convolvulaceae  | Ipomoea_batatas                  | AY596672 |
| Solanales      | Convolvulaceae  | Ipomoea_pes-tigridis             | AY596675 |
| Solanales      | Convolvulaceae  | Iseia_luxurians                  | AY596679 |
| Solanales      | Convolvulaceae  | Jacquemontia_blanchetii          | AY596693 |
| Solanales      | Convolvulaceae  | Jacquemontia_tamniifolia         | AY596692 |
| Solanales      | Convolvulaceae  | Lepistemon_owariensis            | AY596674 |
| Solanales      | Convolvulaceae  | Maripa_repens                    | AY596695 |
| Solanales      | Convolvulaceae  | Merremia_peltata                 | AY596677 |
| Solanales      | Convolvulaceae  | Merremia_vitifolia               | AY596676 |
| Solanales      | Convolvulaceae  | Neuropeltis_acuminata            | AY596690 |
| Solanales      | Convolvulaceae  | Odonellia_hirtiflora             | AY596680 |
| Solanales      | Convolvulaceae  | Porana_commixta                  | AY596700 |
| Solanales      | Convolvulaceae  | Porana_velutina                  | AY596688 |
| Solanales      | Convolvulaceae  | Poranopsis_paniculata            | AY596698 |
| Solanales      | Convolvulaceae  | Rapona_tiliifolia                | AY596691 |
| Solanales      | Convolvulaceae  | Seddera_hirsuta                  | AY596683 |
| Solanales      | Convolvulaceae  | Stylisma_patens                  | AY596685 |
| Solanales      | Convolvulaceae  | Tetralocularia_pennellii         | AY596681 |
| Solanales      | Convolvulaceae  | Wilsonia_backhousei              | AY596686 |
| Solanales      | Montiniaceae    | Montinia_caryophyllacea          | AY596706 |
| Solanales      | Solanaceae      | Nicotiana_plumbaginifolia        | X07745   |
| Solanales      | Solanaceae      | Nicotiana_repanda                | AF056245 |
| Solanales      | Solanaceae      | Nicotiana_tabacum                | BA000042 |
| Solanales      | Solanaceae      | Petunia_axillaris_subsp._parodii | U61391   |
| Solanales      | Solanaceae      | Schizanthus_pinnatus             | AY596705 |
| <hr/>          |                 |                                  |          |
| Caryophyllids  |                 |                                  |          |
| Caryophyllales | Amaranthaceae   | Beta_vulgaris_subsp._vulgaris    | BA000009 |
| Caryophyllales | Caryophyllaceae | Silene_acaulis                   | EF547203 |
| Caryophyllales | Caryophyllaceae | Silene_latifolia                 | EF547204 |
| Caryophyllales | Caryophyllaceae | Silene_noctiflora                | EF547205 |
| Caryophyllales | Caryophyllaceae | Silene_uniflora                  | DQ841782 |
| Caryophyllales | Caryophyllaceae | Silene_vulgaris                  | DQ841789 |
| Caryophyllales | Caryophyllaceae | Stellaria_sp._Qiu                | EF547206 |
| Caryophyllales | Nepenthaceae    | Nepenthes_sp._Kosobe             | EF547202 |
| Caryophyllales | Nyctaginaceae   | Bougainvillea_glabra             | AY818932 |
| <hr/>          |                 |                                  |          |
| Rosids         |                 |                                  |          |
| Brassicales    | Brassicaceae    | Arabidopsis_thaliana             | Y08501   |
| Brassicales    | Brassicaceae    | Brassica_juncea                  | AY211266 |
| Brassicales    | Brassicaceae    | Brassica_napus                   | AP006444 |
| Brassicales    | Brassicaceae    | Brassica_rapa                    | AF076166 |
| Cucurbitales   | Apodanthaceae   | Apodanthes_caseariae             | AY739071 |
| Cucurbitales   | Apodanthaceae   | Berlinianche_aethiopica          | AY739072 |
| Cucurbitales   | Apodanthaceae   | Pilostyles_thurberi              | AY739073 |

|                      |                   |                              |          |
|----------------------|-------------------|------------------------------|----------|
| Fabales              | Fabaceae          | Glycine_max                  | Z14031   |
| Fabales              | Fabaceae          | Phaseolus_vulgaris           | M64246   |
| Fabales              | Fabaceae          | Pisum_sativum                | X05366   |
| Fabales              | Fabaceae          | Vigna_radiata                | AF071550 |
| Geraniales           | Geraniaceae       | Erodium_pelargoniflorum      | DQ317061 |
| Geraniales           | Geraniaceae       | Pelargonium_x_hortorum       | DQ317063 |
| Geraniales           | Geraniaceae       | Sarcocaulon_vanderietiae     | DQ317062 |
| Geraniales           | Hypseocharitaceae | Hypseocharis_pimpinellifolia | DQ317060 |
| Malpighiales         | Rafflesiaceae     | Rafflesia_pricei             | AY739075 |
| Malpighiales         | Rafflesiaceae     | Rafflesia_tuan-mudae         | AY739074 |
| Malpighiales         | Rafflesiaceae     | Rhizanthus_infanticida       | AY739079 |
| Malpighiales         | Rafflesiaceae     | Sapria_himalayana            | AY739076 |
| Malpighiales         | Rafflesiaceae     | Sapria_poilanei              | AY739077 |
| Malpighiales         | Rafflesiaceae     | Sapria_ram                   | AY739078 |
| Malvales             | Cytinaceae        | Bdallophytum_americanum      | AY739070 |
| Malvales             | Cytinaceae        | Cytinus_ruber                | AY739069 |
| Malvales             | Malvaceae         | Abutilon_x_hybridum          | AY739066 |
| Malvales             | Malvaceae         | Hibiscus_rosa-sinensis       | AY818935 |
| Malvales             | Malvaceae         | Pavonia_spinifex             | AY739067 |
| Myrtales             | Onagraceae        | Oenothera_berteroana         | M24235   |
| Myrtales             | Onagraceae        | Oenothera_biennis            | X04023   |
| Rosales              | Moraceae          | Ficus_pumila                 | AY818933 |
| Rosales              | Rosaceae          | Rubus_sp._JPM-2004           | AY818942 |
| Sapindales           | Sapindaceae       | Aesculus_californica         | AY818930 |
| Saxifragales         | Cercidiphyllaceae | Cercidiphyllum_japonicum     | AY299744 |
| <b>Stem Eudicots</b> |                   |                              |          |
| Buxales              | Buxaceae          | Buxus_sempervirens           | AF197636 |
| Buxales              | Buxaceae          | Pachysandra_procumbens       | AF197634 |
| Buxales              | Buxaceae          | Sarcococca_confusa           | AF197635 |
| Buxales              | Didymelaceae      | Didymeles_perrieri           | AF197637 |
| Proteales            | Nelumbonaceae     | Nelumbo_lutea                | AY009420 |
| Proteales            | Nelumbonaceae     | Nelumbo_nucifera             | AF197654 |
| Proteales            | Platanaceae       | Platanus_occidentalis        | AY009423 |
| Proteales            | Proteaceae        | Grevillea_robusta            | AY009422 |
| Proteales            | Proteaceae        | Persoonia_katerae            | AF197652 |
| Proteales            | Proteaceae        | Petrophile_canescens         | AF197653 |
| Ranunculales         | Berberidaceae     | Epimedium_grandiflorum       | AY299765 |
| Ranunculales         | Berberidaceae     | Mahonia_bealei               | AF197659 |
| Ranunculales         | Berberidaceae     | Podophyllum_peltatum         | AF197660 |
| Ranunculales         | Eupteleaceae      | Euptelea_polyandra           | AF197650 |
| Ranunculales         | Fumariaceae       | Dicentra_sp._Qiu_95026       | AF197649 |
| Ranunculales         | Fumariaceae       | Pseudofumaria_lutea          | AY009416 |
| Ranunculales         | Lardizabalaceae   | Akebia_quinata               | AF197642 |
| Ranunculales         | Lardizabalaceae   | Lardizabala_biternata        | AF197643 |
| Ranunculales         | Lardizabalaceae   | Sargentodoxa_cuneata         | AF197644 |
| Ranunculales         | Lardizabalaceae   | Stauntonia_hexaphylla        | AY299841 |
| Ranunculales         | Menispermaceae    | Cissampelos_paireira         | AF197645 |
| Ranunculales         | Menispermaceae    | Cocculus_trilobus            | AF197646 |
| Ranunculales         | Papaveraceae      | Sanguinaria_canadensis       | AF197651 |
| Ranunculales         | Ranunculaceae     | Aquilegia_canadensis         | AY394727 |
| Ranunculales         | Ranunculaceae     | Ranunculus_sp._Qiu_95024     | AF197714 |
| Ranunculales         | Ranunculaceae     | Xanthorhiza_simplicissima    | AF197658 |
| Sabiales             | Sabiaceae         | Meliosma_squamulata          | AF197656 |
| Sabiales             | Sabiaceae         | Sabia_sp._Qiu_91025          | AF197657 |
| Trochodendrales      | Trochodendraceae  | Tetracentron_sinense         | AF197647 |
| Trochodendrales      | Trochodendraceae  | Trochodendron_aralioides     | AF197648 |
| <b>Magnoliids</b>    |                   |                              |          |
| Canellales           | Canellaceae       | Canella_winterana            | AF197676 |

|             |                    |                          |          |
|-------------|--------------------|--------------------------|----------|
| Canellales  | Canellaceae        | Cinnamodendron_ekmanii   | AF197677 |
| Canellales  | Winteraceae        | Drimys_winteri           | AF197673 |
| Canellales  | Winteraceae        | Pseudowintera_axillaris  | AY394731 |
| Canellales  | Winteraceae        | Takhtajania_perrieri     | DQ007416 |
| Canellales  | Winteraceae        | Tasmania_insipida        | AF197674 |
| Canellales  | Winteraceae        | Tasmania_lanceolata      | AY299847 |
| Canellales  | Winteraceae        | Zygogynum_pauciflorum    | AF197675 |
| Lurales     | Atherospermataceae | Atherosperma_moschatum   | AF197683 |
| Lurales     | Atherospermataceae | Daphnandra_micrantha     | AF197684 |
| Lurales     | Atherospermataceae | Doryphora_sassafras      | AF197688 |
| Lurales     | Calycanthaceae     | Calycanthus_floridus     | AF197678 |
| Lurales     | Calycanthaceae     | Calycanthus_occidentalis | AY299739 |
| Lurales     | Calycanthaceae     | Chimonanthus_praecox     | AF197679 |
| Lurales     | Calycanthaceae     | Idiospermum_australiense | AF197680 |
| Lurales     | Hernandiaceae      | Gyrocarpus_americanus    | AY299773 |
| Lurales     | Hernandiaceae      | Gyrocarpus_sp._Chase_317 | AF197701 |
| Lurales     | Hernandiaceae      | Hernandia_ovigera        | DQ007413 |
| Lurales     | Lauraceae          | Cinnamomum_camphora      | AF197681 |
| Lurales     | Lauraceae          | Cinnamomum_verum         | AY009415 |
| Lurales     | Lauraceae          | Cryptocarya_meissneriana | AF197702 |
| Lurales     | Lauraceae          | Laurus_nobilis           | AF197682 |
| Lurales     | Lauraceae          | Neolitsea_cassia         | AY299811 |
| Lurales     | Monimiaceae        | Hedycarya_arborea        | AF197689 |
| Lurales     | Monimiaceae        | Hortonia_floribunda      | DQ007414 |
| Lurales     | Monimiaceae        | Palmeria_scandens        | AF197685 |
| Lurales     | Monimiaceae        | Peumus_boldus            | AF197686 |
| Lurales     | Siparunaceae       | Siparuna_decipiens       | AF197687 |
| Magnoliales | Annonaceae         | Annona_muricata          | AF197695 |
| Magnoliales | Annonaceae         | Asimina_triloba          | AF197696 |
| Magnoliales | Annonaceae         | Cananga_odorata          | AF197700 |
| Magnoliales | Annonaceae         | Polyalthia_suberosa      | AF197694 |
| Magnoliales | Degeneriaceae      | Degeneria_vitiensis      | AF293752 |
| Magnoliales | Eupomatiaceae      | Eupomatia_bennettii      | AF197692 |
| Magnoliales | Eupomatiaceae      | Eupomatia_laurina        | AY299767 |
| Magnoliales | Himantandraceae    | Galbulimima_belgraveana  | AF197693 |
| Magnoliales | Magnoliaceae       | Liriodendron_chinense    | AF197690 |
| Magnoliales | Magnoliaceae       | Liriodendron_tulipifera  | AY394730 |
| Magnoliales | Magnoliaceae       | Magnolia_grandiflora     | AF209100 |
| Magnoliales | Magnoliaceae       | Magnolia_tripetala       | AF197691 |
| Magnoliales | Magnoliaceae       | Michelia_figo            | AY299802 |
| Magnoliales | Myristicaceae      | Knema_kinabaluensis      | AY009419 |
| Magnoliales | Myristicaceae      | Knema_latericia          | AF197697 |
| Magnoliales | Myristicaceae      | Mauloutchia_chapelieri   | AF197699 |
| Magnoliales | Myristicaceae      | Myristica_fragrans       | AF197698 |
| Piperales   | Aristolochiaceae   | Aristolochia_elegans     | AY009408 |
| Piperales   | Aristolochiaceae   | Aristolochia_gigantea    | AY299718 |
| Piperales   | Aristolochiaceae   | Aristolochia_macrophylla | AF197669 |
| Piperales   | Aristolochiaceae   | Asarum_canadense         | AF197671 |
| Piperales   | Aristolochiaceae   | Saruma_henryi            | AF197672 |
| Piperales   | Aristolochiaceae   | Thottea_tomentosa        | AF197670 |
| Piperales   | Hydnoraceae        | Hydnora_africana         | AF503356 |
| Piperales   | Hydnoraceae        | Prosopanche_americanana  | AF503357 |
| Piperales   | Lactoridaceae      | Lactoris_fernandeziana   | AF197710 |
| Piperales   | Piperaceae         | Macropiper_excelsum      | AY299799 |
| Piperales   | Piperaceae         | Peperomia_obtusifolia    | AF197629 |
| Piperales   | Piperaceae         | Peperomia_polybotrya     | AY299819 |
| Piperales   | Piperaceae         | Piper_betle              | AF197630 |
| Piperales   | Piperaceae         | Piper_bicolor            | AY009421 |

|                      |                  |                                                   |          |
|----------------------|------------------|---------------------------------------------------|----------|
| Piperales            | Piperaceae       | <i>Piper_nigrum</i>                               | AF039243 |
| Piperales            | Saururaceae      | <i>Anemopsis_californica</i>                      | AF197631 |
| Piperales            | Saururaceae      | <i>Houttuynia_cordata</i>                         | AF197632 |
| Piperales            | Saururaceae      | <i>Saururus_cernuus</i>                           | AF197633 |
| Piperales            | Saururaceae      | <i>Saururus_chinensis</i>                         | AY009424 |
| <b>Chloranthales</b> |                  |                                                   |          |
| Chloranthales        | Chloranthaceae   | <i>Ascarina_sp._Qiu-M149</i>                      | AF197667 |
| Chloranthales        | Chloranthaceae   | <i>Chloranthus_multistachys</i>                   | AF197665 |
| Chloranthales        | Chloranthaceae   | <i>Chloranthus_spicatus</i>                       | AY299746 |
| Chloranthales        | Chloranthaceae   | <i>Hedyosmum_arborescens</i>                      | AF197668 |
| Chloranthales        | Chloranthaceae   | <i>Hedyosmum_sp._CCWD-2000</i>                    | AY009414 |
| Chloranthales        | Chloranthaceae   | <i>Hedyosmum_sp._Stevenson_1188</i>               | AY299777 |
| Chloranthales        | Chloranthaceae   | <i>Sarcandra_chloranthoides</i>                   | AF197666 |
| <b>Monocots</b>      |                  |                                                   |          |
| Acorales             | Acoraceae        | <i>Acorus_calamus</i>                             | AF039256 |
| Acorales             | Acoraceae        | <i>Acorus_gramineus</i>                           | AF197622 |
| Acorales             | Acoraceae        | <i>Acorus_tatarinowii</i>                         | AY299700 |
| Alismatales          | Alismataceae     | <i>Alisma_plantago-aquatica</i>                   | AF197717 |
| Alismatales          | Alismataceae     | <i>Caldesia_oligococca</i>                        | AY277800 |
| Alismatales          | Alismataceae     | <i>Sagittaria_latifolia</i>                       | AY394732 |
| Alismatales          | Araceae          | <i>Arisaema_triphyllum</i>                        | AY299717 |
| Alismatales          | Araceae          | <i>Gymnostachys_anceps</i>                        | AF039244 |
| Alismatales          | Araceae          | <i>Orontium_aquaticum</i>                         | AF197705 |
| Alismatales          | Araceae          | <i>Spathiphyllum_wallisii</i>                     | AF197706 |
| Alismatales          | Araceae          | <i>Symplocarpus_foetidus</i>                      | AF039245 |
| Alismatales          | Butomaceae       | <i>Butomus_umbellatus</i>                         | AY299733 |
| Alismatales          | Cymodoceaceae    | <i>Cymodocea_serrulata</i>                        | AY277801 |
| Alismatales          | Hydrocharitaceae | <i>Ottelia_ovalifolia</i>                         | AY277802 |
| Alismatales          | Juncaginaceae    | <i>Triglochin_maritima</i>                        | AF197716 |
| Alismatales          | Potamogetonaceae | <i>Potamogeton_berchtoldii</i>                    | AF197715 |
| Alismatales          | Potamogetonaceae | <i>Potamogeton_natans</i>                         | AY299829 |
| Alismatales          | Scheuchzeriaceae | <i>Scheuchzeria_palustris</i>                     | AY277803 |
| Alismatales          | Tofieldiaceae    | <i>Pleea_tenuifolia</i>                           | AF197703 |
| Alismatales          | Tofieldiaceae    | <i>Tofieldia_caliculata</i>                       | AF197704 |
| Arecales             | Arecaceae        | <i>Calamus_caryotoides</i>                        | AY299734 |
| Arecales             | Arecaceae        | <i>Calamus_usitatus</i>                           | U58832   |
| Arecales             | Arecaceae        | <i>Euterpe_oleracea</i>                           | AY299769 |
| Arecales             | Arecaceae        | <i>Nypa_fruticans</i>                             | U58833   |
| Arecales             | Arecaceae        | <i>Phoenix_reclinata</i>                          | U58831   |
| Arecales             | Arecaceae        | <i>Phytelephas_aequatorialis</i>                  | AY299825 |
| Arecales             | Arecaceae        | <i>Plectocomia_elongata</i>                       | AY299826 |
| Arecales             | Arecaceae        | <i>Trithrinax_acanthocoma</i>                     | AY299853 |
| Asparagales          | Agapanthaceae    | <i>Agapanthus_africanus</i>                       | AY299701 |
| Asparagales          | Agavaceae        | <i>Agave_bracteosa</i>                            | AY299702 |
| Asparagales          | Agavaceae        | <i>Agave_ghiesbreghtii</i>                        | AY299703 |
| Asparagales          | Agavaceae        | <i>Anemarrhena_asphodeloides</i>                  | AY299711 |
| Asparagales          | Agavaceae        | <i>Anthericum_sp._Weigend_et_Weigend_2000/154</i> | AY299713 |
| Asparagales          | Agavaceae        | <i>Behnia_reticulata</i>                          | AY299726 |
| Asparagales          | Agavaceae        | <i>Herreria_montevicensis</i>                     | AY299781 |
| Asparagales          | Agavaceae        | <i>Sowerbaea_laxiflora</i>                        | AY299838 |
| Asparagales          | Alliaceae        | <i>Allium_altaicum</i>                            | AY299707 |
| Asparagales          | Alliaceae        | <i>Ipheion_uniflorum</i>                          | AY299787 |
| Asparagales          | Amaryllidaceae   | <i>Clivia_nobilis</i>                             | AY299749 |
| Asparagales          | Aphyllanthaceae  | <i>Aphyllanthes_monspeliensis</i>                 | AY299714 |
| Asparagales          | Asparagaceae     | <i>Asparagus_officinalis</i>                      | AF197713 |
| Asparagales          | Asphodelaceae    | <i>Asphodelus_aestivus</i>                        | AY299721 |
| Asparagales          | Asphodelaceae    | <i>Kniphofia_uvaria</i>                           | AY299792 |
| Asparagales          | Asteliaceae      | <i>Astelia_sp._Grimes_3525</i>                    | AY299722 |

|               |                   |                                           |          |
|---------------|-------------------|-------------------------------------------|----------|
| Asparagales   | Asteliaceae       | Neoastelia_spectabilis                    | AY299810 |
| Asparagales   | Blandfordiaceae   | Blandfordia_grandiflora                   | AY299727 |
| Asparagales   | Boryaceae         | Alania_endlicheri                         | AY299705 |
| Asparagales   | Boryaceae         | Borya_aff_sphaerocephala_Conran_et_al_944 | AY299728 |
| Asparagales   | Doryanthaceae     | Doryanthes_excelsa                        | AY299760 |
| Asparagales   | Hemerocallidaceae | Dianella_caerulea                         | AY299756 |
| Asparagales   | Hemerocallidaceae | Johnsonia_lupulina                        | AY299791 |
| Asparagales   | Hyacinthaceae     | Muscari_neglectum                         | AY299807 |
| Asparagales   | Hyacinthaceae     | Scilla_libanotica                         | AY299836 |
| Asparagales   | Hypoxidaceae      | Curculigo_capitulata                      | AF039249 |
| Asparagales   | Hypoxidaceae      | Hypoxis_occidentalis                      | AY299784 |
| Asparagales   | Iridaceae         | Neomarica_northiana                       | AY299812 |
| Asparagales   | Iridaceae         | Sisyrinchium_angustifolium                | AY299837 |
| Asparagales   | Ixiolirionaceae   | Ixiolirion_tataricum                      | AY299789 |
| Asparagales   | Lanariaceae       | Lanaria_lanata                            | AY299796 |
| Asparagales   | Laxmanniaceae     | Arthropodium_cirrhatum                    | AY299719 |
| Asparagales   | Laxmanniaceae     | Thysanotus_thyrsoideus                    | AY299850 |
| Asparagales   | Orchidaceae       | Calopogon_tuberosus                       | AY299738 |
| Asparagales   | Orchidaceae       | Cypripedium_calceolus                     | AY299755 |
| Asparagales   | Orchidaceae       | Epipactis_helleborine                     | AY299766 |
| Asparagales   | Orchidaceae       | Isotria_verticillata                      | AY299788 |
| Asparagales   | Orchidaceae       | Neuwiedia_veratrifolia                    | AY299813 |
| Asparagales   | Ruscaceae         | Convallaria_keiskei                       | AY299752 |
| Asparagales   | Tecophilaeaceae   | Tecophilaea_cyanocrocus                   | AY299848 |
| Asparagales   | Themidaceae       | Brodiaea_californica                      | AY299730 |
| Asparagales   | Xanthorrhoeaceae  | Xanthorrhoea_australis                    | AF039250 |
| Asparagales   | Xeronemataceae    | Xeronema_callistemon                      | AY299857 |
| Commelinales  | Commelinaceae     | Callisia_warszewicziana                   | AY299736 |
| Commelinales  | Commelinaceae     | Cochliostema_odoratissimum                | AY299750 |
| Commelinales  | Commelinaceae     | Commelina_communis                        | AY299751 |
| Commelinales  | Commelinaceae     | Dichorandra_thyrsiflora                   | AY299757 |
| Commelinales  | Commelinaceae     | Murdannia_sp_BH_75-650                    | AY299805 |
| Commelinales  | Commelinaceae     | Palisota_bracteosa                        | AY299817 |
| Commelinales  | Haemodoraceae     | Anigozanthos_flavidus                     | AF039246 |
| Commelinales  | Haemodoraceae     | Haemodorum_simulans                       | AY299774 |
| Commelinales  | Haemodoraceae     | Xiphidium_caeruleum                       | AY299858 |
| Commelinales  | Hanguanaceae      | Hanguana_malayana                         | AY299775 |
| Commelinales  | Philydraceae      | Helmholtzia_glaberrima                    | AY299779 |
| Commelinales  | Philydraceae      | Philydrella_pygmaea                       | AY299823 |
| Commelinales  | Philydraceae      | Philydrum_lanuginosum                     | AY299824 |
| Commelinales  | Pontederiaceae    | Eichhornia_azurea                         | AY299762 |
| Commelinales  | Pontederiaceae    | Eichhornia_paniculata                     | AY299763 |
| Commelinales  | Pontederiaceae    | Heteranthera_rotundifolia                 | AY299782 |
| Commelinales  | Pontederiaceae    | Hydrothrix_gardneri                       | AY299783 |
| Commelinales  | Pontederiaceae    | Monochoria_korsakowii                     | AY299803 |
| Commelinales  | Pontederiaceae    | Pontederia_cordata                        | AY299828 |
| Dasypogonales | Dasypogonaceae    | Bacteria_australis                        | AY124504 |
| Dasypogonales | Dasypogonaceae    | Calectasia_cyanea                         | AY124505 |
| Dasypogonales | Dasypogonaceae    | Dasypogon_hookeri                         | AY124503 |
| Dasypogonales | Dasypogonaceae    | Kingia_australis                          | AY124506 |
| Dioscoreales  | Burmanniaceae     | Burmannia_lutescens                       | AY299732 |
| Dioscoreales  | Burmanniaceae     | Thismia_rodwayi                           | AY299849 |
| Dioscoreales  | Dioscoreaceae     | Dioscorea_communis                        | AY277804 |
| Dioscoreales  | Dioscoreaceae     | Dioscorea_mexicana                        | AY009417 |
| Dioscoreales  | Dioscoreaceae     | Dioscorea_retusa                          | AY299759 |
| Dioscoreales  | Dioscoreaceae     | Dioscorea_sp_Qiu_94044                    | AF197709 |
| Dioscoreales  | Dioscoreaceae     | Tacca_leontopetaloides                    | AF039252 |
| Dioscoreales  | Dioscoreaceae     | Tacca_parkeri                             | AY299845 |



|               |                  |                                                |          |
|---------------|------------------|------------------------------------------------|----------|
| Dioscoreales  | Dioscoreaceae    | Trichopus_sempervirens                         | AY299724 |
| Dioscoreales  | Dioscoreaceae    | Trichopus_zeylanicus                           | AY277805 |
| Dioscoreales  | Nartheciaceae    | Aletris_farinosa                               | AY299706 |
| Dioscoreales  | Nartheciaceae    | Nartheicum_ossifragum                          | AY299809 |
| Liliales      | Alstroemeriaceae | Alstroemeria_caryophyllaea                     | AF039254 |
| Liliales      | Campynemataceae  | Campynema_lineare                              | AY299740 |
| Liliales      | Colchicaceae     | Burchardia_multiflora                          | AY299731 |
| Liliales      | Colchicaceae     | Clintonia_borealis                             | AY299748 |
| Liliales      | Colchicaceae     | Schelhammera_multiflora                        | AY299834 |
| Liliales      | Colchicaceae     | Wurmbea_sp._Conran_et_al._899                  | AY299856 |
| Liliales      | Corsiaceae       | Arachnitis_uniflora                            | AY299715 |
| Liliales      | Liliaceae        | Calochortus_minimus                            | AY299737 |
| Liliales      | Liliaceae        | Lilium_superbum                                | AY299797 |
| Liliales      | Liliaceae        | Lilium_tigrinum                                | AY394729 |
| Liliales      | Luzuriagaceae    | Luzuriaga_radicans                             | AY299798 |
| Liliales      | Melanthiaceae    | Amianthium_muscitoxicum                        | AY299709 |
| Liliales      | Melanthiaceae    | Chamaelirium_luteum                            | AY299745 |
| Liliales      | Melanthiaceae    | Trillium_grandiflorum                          | AF039253 |
| Liliales      | Melanthiaceae    | Veratrum_viride                                | AF039255 |
| Liliales      | Petermanniaceae  | Petermannia_cirrosa                            | AY299820 |
| Liliales      | Philesiaceae     | Eustrephus_latifolius                          | AY299768 |
| Liliales      | Philesiaceae     | Philesia_magellanica                           | AY299822 |
| Liliales      | Ripogonaceae     | Ripogonum_discolor                             | AY299831 |
| Liliales      | Smilacaceae      | Geitonoplesium_cymosum                         | AY299771 |
| Liliales      | Smilacaceae      | Smilax_rotundifolia                            | AF039251 |
| Pandanales    | Cyclanthaceae    | Carludovica_palmata                            | AF197707 |
| Pandanales    | Cyclanthaceae    | Chorigyne_cylindrica                           | AY299747 |
| Pandanales    | Cyclanthaceae    | Cyclanthus_bipartitus                          | AY299754 |
| Pandanales    | Cyclanthaceae    | Sphaeradenia_stenosperma                       | AY299840 |
| Pandanales    | Pandanaceae      | Freycinetia_multiflora                         | AY299770 |
| Pandanales    | Pandanaceae      | Pandanus_copelandii                            | AY299818 |
| Pandanales    | Stemonaceae      | Croonia_pauciflora                             | AF197708 |
| Pandanales    | Stemonaceae      | Stemona_javanica                               | AY299842 |
| Pandanales    | Triuridaceae     | Lacandonia_schismatica                         | AY299794 |
| Pandanales    | Triuridaceae     | Sciaphila_albescens                            | AY299835 |
| Pandanales    | Triuridaceae     | Triuris_sp._Vergara_Silva_s.n.                 | AY299854 |
| Pandanales    | Velloziaceae     | Acanthochlamys_bracteata                       | AY299698 |
| Pandanales    | Velloziaceae     | Barbaceniopsis_sp._Weigend_et_Weigend_2000-318 | AY299725 |
| Pandanales    | Velloziaceae     | Vellozia_elegans                               | AF039247 |
| Petrosaviales | Petrosaviaceae   | Japonolirion_osense                            | AY299790 |
| Petrosaviales | Petrosaviaceae   | Petrosavia_stellaris                           | AY299821 |
| Poales        | Anarthriaceae    | Anarthria_prolifera                            | AY124513 |
| Poales        | Bromeliaceae     | Ananas_comosus                                 | AY299710 |
| Poales        | Bromeliaceae     | Brocchinia_reducta                             | AY299729 |
| Poales        | Bromeliaceae     | Catopsis_nutans                                | AF039257 |
| Poales        | Bromeliaceae     | Hechtia_texensis                               | AY299776 |
| Poales        | Bromeliaceae     | Puya_berteroniana                              | AY124508 |
| Poales        | Bromeliaceae     | Tillandsia_usneoides                           | AY124507 |
| Poales        | Cyperaceae       | aff._Cladium_sp._JID-2002                      | AY124515 |
| Poales        | Cyperaceae       | Carex_interior                                 | AY124514 |
| Poales        | Ecdeiocoleaceae  | Ecdeiocolea_monostachya                        | AY124516 |
| Poales        | Eriocaulaceae    | Eriocaulon_aquaticum                           | AF039258 |
| Poales        | Eriocaulaceae    | Eriocaulon_humboldtii                          | AY124517 |
| Poales        | Eriocaulaceae    | Lachnocaulon_anceps                            | AY299795 |
| Poales        | Eriocaulaceae    | Syngonanthus_flavidulus                        | AY299844 |
| Poales        | Eriocaulaceae    | Tonina_fluviatilis                             | AY124518 |
| Poales        | Flagellariaceae  | Flagellaria_indica                             | AF039248 |
| Poales        | Joinvilleaceae   | Joinvillea_ascendens                           | AY124519 |

|                         |                   |                                                |          |
|-------------------------|-------------------|------------------------------------------------|----------|
| Poales                  | Joinvilleaceae    | Joinvillea_plicata                             | AY394728 |
| Poales                  | Juncaceae         | Juncus_sp._JID-2002                            | AY124520 |
| Poales                  | Juncaceae         | Luzula_acuminata                               | AY124521 |
| Poales                  | Mayacaceae        | Mayaca_sellowiana                              | AY124522 |
| Poales                  | Poaceae           | Anomochloa_marantoidea                         | AY124526 |
| Poales                  | Poaceae           | Bambusa_multiplex                              | AY124525 |
| Poales                  | Poaceae           | Elymus_sibiricus                               | AJ291297 |
| Poales                  | Poaceae           | Oryza_sativa                                   | BA000029 |
| Poales                  | Poaceae           | Pennisetum_glaucum                             | AF511560 |
| Poales                  | Poaceae           | Pharus_latifolius                              | AY124524 |
| Poales                  | Poaceae           | Secale_cereale                                 | X99020   |
| Poales                  | Poaceae           | Secale_strictum_subsp._africanum               | DQ401027 |
| Poales                  | Poaceae           | Streptochaeta_angustifolia                     | AY124523 |
| Poales                  | Poaceae           | Triticum_aestivum                              | AP008982 |
| Poales                  | Poaceae           | Triticum_turgidum_subsp._durum_x_Triticosecale | X80469   |
| Poales                  | Poaceae           | Zea_mays                                       | AY506529 |
| Poales                  | Rapateaceae       | Cephalostemon_flavus                           | AY299742 |
| Poales                  | Rapateaceae       | Epidryos_allenii                               | AY299764 |
| Poales                  | Rapateaceae       | Kunhardtia_radiata                             | AY299793 |
| Poales                  | Rapateaceae       | Rapatea_xiphoides                              | AY124511 |
| Poales                  | Rapateaceae       | Schoenocephalium_cucullatum                    | AY124512 |
| Poales                  | Rapateaceae       | Spathanthus_bicolor                            | AY299839 |
| Poales                  | Rapateaceae       | Stegolepis_parvipetala                         | AY124535 |
| Poales                  | Restionaceae      | Baloskion_tetraphyllum                         | AY124529 |
| Poales                  | Restionaceae      | Elegia_fenestrata                              | AY124530 |
| Poales                  | Restionaceae      | Lepyrodia_scariosa                             | AY124528 |
| Poales                  | Restionaceae      | Thamnochortus_cinereus                         | AY124531 |
| Poales                  | Sparganiaceae     | Sparganium_eurycarpum                          | AY124509 |
| Poales                  | Thurniaceae       | Prionium_serratum                              | AY124527 |
| Poales                  | Thurniaceae       | Thurnia_polycephala                            | AY124532 |
| Poales                  | Typhaceae         | Typha_latifolia                                | AY124510 |
| Poales                  | Xyridaceae        | Abolboda_macrostachya                          | AY124533 |
| Poales                  | Xyridaceae        | Aratitiopea_lopezii                            | AY299716 |
| Poales                  | Xyridaceae        | Orectanthe_sceptrum                            | AY124534 |
| Poales                  | Xyridaceae        | Xyris_bicephala                                | AY124536 |
| Poales                  | Xyridaceae        | Xyris_jupicai                                  | AY299859 |
| Zingiberales            | Cannaceae         | Canna_indica                                   | AF039259 |
| Zingiberales            | Costaceae         | Costus_lateriflorus                            | AY299753 |
| Zingiberales            | Costaceae         | Dimerocostus_argenteus                         | AY299758 |
| Zingiberales            | Costaceae         | Monocostus_uniflorus                           | AY299804 |
| Zingiberales            | Costaceae         | Tapeinochilos_sp._L-86.0039                    | AY299846 |
| Zingiberales            | Heliconiaceae     | Heliconia_rostrata                             | AY299778 |
| Zingiberales            | Lowiaceae         | Orchidantha_maxillarioides                     | AY299815 |
| Zingiberales            | Marantaceae       | Calathea_loeseneri                             | AY299735 |
| Zingiberales            | Marantaceae       | Maranta_leuconeura                             | AY299801 |
| Zingiberales            | Musaceae          | Musa_textilis                                  | AY299806 |
| Zingiberales            | Strelitziaceae    | Ravenala_madagascariensis                      | AY299830 |
| Zingiberales            | Strelitziaceae    | Strelitzia_nicolai                             | AY299843 |
| Zingiberales            | Zingiberaceae     | Alpinia_purpurata                              | AY299708 |
| Zingiberales            | Zingiberaceae     | Globba_winitii                                 | AY299772 |
| <b>Ceratophyllales</b>  |                   |                                                |          |
| Ceratophyllales         | Ceratophyllaceae  | Ceratophyllum_demersum                         | AF197627 |
| Ceratophyllales         | Ceratophyllaceae  | Ceratophyllum_submersum                        | AF197628 |
| <b>Stem Angiosperms</b> |                   |                                                |          |
| Amborellales            | Amborellaceae     | Amborella_trichopoda                           | AY009407 |
| Austrobaileyales        | Austrobaileyaceae | Austrobaileya_scandens                         | AF197664 |
| Austrobaileyales        | Schisandraceae    | Illicium_anisatum                              | AY299786 |
| Austrobaileyales        | Schisandraceae    | Illicium_floridanum                            | AF197663 |

|                  |                 |                              |          |
|------------------|-----------------|------------------------------|----------|
| Austrobaileyales | Schisandraceae  | Illicium_lanceolatum         | AF209101 |
| Austrobaileyales | Schisandraceae  | Kadsura_japonica             | AF197661 |
| Austrobaileyales | Schisandraceae  | Schisandra_henryi            | AY009425 |
| Austrobaileyales | Schisandraceae  | Schisandra_sphenanthera      | AF197662 |
| Austrobaileyales | Trimeniaceae    | Trimenia_moorei              | DQ007415 |
| Austrobaileyales | Trimeniaceae    | Trimenia_sp._CCWD-2000       | AY009428 |
| Nymphaeales      | Cabombaceae     | Brasenia_schreberi           | AF197640 |
| Nymphaeales      | Cabombaceae     | Cabomba_sp._Qiu_97027        | AF197641 |
| Nymphaeales      | Nymphaeaceae    | Nuphar_sp._Qiu_M114          | AF197638 |
| Nymphaeales      | Nymphaeaceae    | Nymphaea_odorata             | AY299814 |
| Nymphaeales      | Nymphaeaceae    | Nymphaea_sp._Qiu_91029       | AF197639 |
| Nymphaeales      | Nymphaeaceae    | Victoria_cruziana            | AY299855 |
| <hr/>            |                 |                              |          |
| Gymnosperms      |                 |                              |          |
| Coniferales      | Araucariaceae   | Agathis_australis            | AF209103 |
| Coniferales      | Araucariaceae   | Araucaria_heterophylla       | AF209104 |
| Coniferales      | Cephalotaxaceae | Cephalotaxus_harringtonia    | DQ646222 |
| Coniferales      | Cupressaceae    | Juniperus_virginiana         | AF209106 |
| Coniferales      | Cupressaceae    | Metasequoia_glyptostroboides | AF197619 |
| Coniferales      | Pinaceae        | Abies_homolepis              | DQ646224 |
| Coniferales      | Pinaceae        | Cedrus_deodara               | DQ646223 |
| Coniferales      | Pinaceae        | Pinus_sp._Qiu_94013          | AF197626 |
| Coniferales      | Pinaceae        | Pinus_strobus                | AF209108 |
| Coniferales      | Podocarpaceae   | Phyllocladus_aspleniifolius  | DQ646219 |
| Coniferales      | Podocarpaceae   | Podocarpus_macrophyllus      | AF209105 |
| Coniferales      | Sciadopityaceae | Sciadopitys_verticillata     | DQ646220 |
| Coniferales      | Taxaceae        | Taxus_x_media                | DQ646221 |
| Cycadales        | Cycadaceae      | Cycas_revoluta               | AF197623 |
| Cycadales        | Stangeriaceae   | Stangeria_eriopus            | DQ646218 |
| Cycadales        | Zamiaceae       | Zamia_furfuracea             | AF209111 |
| Cycadales        | Zamiaceae       | Zamia_integrifolia           | AF197624 |
| Ephedrales       | Ephedraceae     | Ephedra_distachya            | DQ646225 |
| Ginkgoales       | Ginkgoaceae     | Ginkgo_biloba                | AF209110 |
| Gnetales         | Gnetaceae       | Gnetum_gnemon                | AF197617 |
| Gnetales         | Gnetaceae       | Gnetum_ula                   | AF209109 |
| Welwitschiales   | Welwitschiaceae | Welwitschia_mirabilis        | AF197618 |

**Table S3. Taxon information for figure 2**

| Asterids     |                  |                                      |          |
|--------------|------------------|--------------------------------------|----------|
| Apiales      | Apiaceae         | Daucus_carota                        | AY820131 |
| Apiales      | Araliaceae       | Hydrocotyle_rotundifolia             | AJ223424 |
| Aquifoliales | Aquifoliaceae    | Ilex_sp._Qiu_94038                   | AJ223429 |
| Asterales    | Goodeniaceae     | Goodenia_ovata                       | AY053575 |
| Dipsacales   | Adoxaceae        | Sambucus_canadensis                  | AF193965 |
| Ericales     | Ebenaceae        | Diospyros_virginiana                 | AJ223417 |
| Ericales     | Ericaceae        | Pyrola_secunda                       | AJ247582 |
| Ericales     | Lecythidaceae    | Barringtonia_asiatica                | AJ247581 |
| Ericales     | Polemoniaceae    | Phlox_paniculata                     | AY053576 |
| Ericales     | Sarraceniaceae   | Heliamphora_heterodoxa               | AY600113 |
| Ericales     | Symplocaceae     | Symplocos_paniculata                 | AJ223435 |
| Gentianales  | Apocynaceae      | Catharanthus_roseus                  | AJ223423 |
| Gentianales  | Apocynaceae      | Hoya_lanceolata                      | AJ247588 |
| Gentianales  | Apocynaceae      | Nerium_oleander                      | AJ223431 |
| Gentianales  | Loganiaceae      | Strychnos_spinosa                    | AJ247596 |
| Gentianales  | Rubiaceae        | Coffea_arabica                       | AJ247586 |
| Gentianales  | Rubiaceae        | Ixora_sp._Qiu95051                   | AJ247587 |
| Lamiales     | Acanthaceae      | Barleria_prionitis                   | AJ247601 |
| Lamiales     | Acanthaceae      | Justicia_americana                   | AJ247602 |
| Lamiales     | Acanthaceae      | Sanchezia_nobilis                    | AJ223437 |
| Lamiales     | Acanthaceae      | Thunbergia_erecta                    | AJ247603 |
| Lamiales     | Bignoniaceae     | Catalpa_fargesii                     | AJ223411 |
| Lamiales     | Byblidaceae      | Byblis_liniflora                     | AY600112 |
| Lamiales     | Calceolariaceae  | Calceolaria_sp._IUGH                 | AJ247585 |
| Lamiales     | Gesneriaceae     | Columnea_sp._Lindqvist_and_Albert_30 | AF482513 |
| Lamiales     | Gesneriaceae     | Drymonia_serrulata                   | AJ247579 |
| Lamiales     | Gesneriaceae     | Nematanthus_hirsutus                 | AJ247578 |
| Lamiales     | Lamiaceae        | Ajuga_reptans                        | AJ247595 |
| Lamiales     | Lamiaceae        | Clerodendrum_trichotomum             | AJ223414 |
| Lamiales     | Lamiaceae        | Lamium_sp._Qiu_95019                 | AJ223428 |
| Lamiales     | Lamiaceae        | Physostegia_virginiana               | AJ247594 |
| Lamiales     | Lamiaceae        | Scutellaria_mociniana                | AJ247593 |
| Lamiales     | Lentibulariaceae | Genlisea_aurea                       | AY600088 |
| Lamiales     | Lentibulariaceae | Genlisea_hispidula                   | AY600089 |
| Lamiales     | Lentibulariaceae | Genlisea_violacea                    | AY600090 |
| Lamiales     | Lentibulariaceae | Pinguicula_ehlersiae                 | AF482514 |
| Lamiales     | Lentibulariaceae | Pinguicula_gracilis                  | AF482515 |
| Lamiales     | Lentibulariaceae | Pinguicula_grandiflora               | AF482516 |
| Lamiales     | Lentibulariaceae | Pinguicula_gypsicola                 | AF482517 |
| Lamiales     | Lentibulariaceae | Pinguicula_sp._Jobson_240            | AY600087 |
| Lamiales     | Lentibulariaceae | Utricularia_adpressa                 | AF482518 |
| Lamiales     | Lentibulariaceae | Utricularia_alpina                   | AF482519 |
| Lamiales     | Lentibulariaceae | Utricularia_asplundii                | AY600091 |
| Lamiales     | Lentibulariaceae | Utricularia_biloba                   | AY600092 |
| Lamiales     | Lentibulariaceae | Utricularia_caerulea                 | AY600093 |
| Lamiales     | Lentibulariaceae | Utricularia_costata                  | AY600094 |
| Lamiales     | Lentibulariaceae | Utricularia_dichotoma                | AY600095 |
| Lamiales     | Lentibulariaceae | Utricularia_flaccida                 | AY600096 |
| Lamiales     | Lentibulariaceae | Utricularia_geminiscapa              | AF482520 |
| Lamiales     | Lentibulariaceae | Utricularia_gibba                    | AY600097 |
| Lamiales     | Lentibulariaceae | Utricularia_longifolia               | AY600098 |
| Lamiales     | Lentibulariaceae | Utricularia_meyeri                   | AY600099 |
| Lamiales     | Lentibulariaceae | Utricularia_multifida                | AY600100 |
| Lamiales     | Lentibulariaceae | Utricularia_myricocista              | AY600101 |
| Lamiales     | Lentibulariaceae | Utricularia_neottioides              | AY600102 |
| Lamiales     | Lentibulariaceae | Utricularia_olivacea                 | AY600103 |

|           |                  |                          |          |
|-----------|------------------|--------------------------|----------|
| Lamiales  | Lentibulariaceae | Utricularia_pubescens    | AY128568 |
| Lamiales  | Lentibulariaceae | Utricularia_striatula    | AY600104 |
| Lamiales  | Lentibulariaceae | Utricularia_subulata     | AY600105 |
| Lamiales  | Lentibulariaceae | Utricularia_triloba      | AF482521 |
| Lamiales  | Lentibulariaceae | Utricularia_violacea     | AY600106 |
| Lamiales  | Oleaceae         | Jasminum_polyanthum      | AJ247607 |
| Lamiales  | Oleaceae         | Olea_europaea            | AF288707 |
| Lamiales  | Paulowniaceae    | Paulownia_tomentosa      | AJ247592 |
| Lamiales  | Pedaliaceae      | Sesamum_indicum          | AJ247598 |
| Lamiales  | Plantaginaceae   | Callitriche_heterophylla | AJ247577 |
| Lamiales  | Plantaginaceae   | Digitalis_purpurea       | AJ223415 |
| Lamiales  | Plantaginaceae   | Hebe_subalpina           | AJ223419 |
| Lamiales  | Plantaginaceae   | Plantago_atrata          | AJ389610 |
| Lamiales  | Plantaginaceae   | Plantago_australis       | AJ389608 |
| Lamiales  | Plantaginaceae   | Plantago_coronopus       | AJ389609 |
| Lamiales  | Plantaginaceae   | Plantago_cynops          | AJ389612 |
| Lamiales  | Plantaginaceae   | Plantago_lanceolata      | AJ389611 |
| Lamiales  | Plantaginaceae   | Plantago_media           | AJ389605 |
| Lamiales  | Plantaginaceae   | Plantago_rigida          | AJ389607 |
| Lamiales  | Plantaginaceae   | Plantago_rugelii         | AJ389606 |
| Lamiales  | Plantaginaceae   | Plantago_sericea         | AJ389613 |
| Lamiales  | Plantaginaceae   | Veronica_catenata        | AJ223427 |
| Lamiales  | Scrophulariaceae | Celsia_arturus           | AJ247590 |
| Lamiales  | Scrophulariaceae | Scrophularia_nodosa      | AJ247591 |
| Lamiales  | Unplaced         | Rehmannia_glutinosa      | AJ247589 |
| Solanales | Solanaceae       | Lycopersicon_esculentum  | X54738   |
| Solanales | Solanaceae       | Nicotiana_tabacum        | BA000042 |
| Solanales | Solanaceae       | Solanum_commersonii      | AJ582177 |
| Solanales | Solanaceae       | Solanum_tuberosum        | X83206   |
| Unplaced  | Boraginaceae     | Ehretia_anacua           | AJ247606 |
| Unplaced  | Boraginaceae     | Heliotropium_arborescens | AJ223425 |

---

#### Caryophyllids

|                |                 |                               |          |
|----------------|-----------------|-------------------------------|----------|
| Caryophyllales | Amaranthaceae   | Beta_vulgaris_subsp._vulgaris | X57693   |
| Caryophyllales | Amaranthaceae   | Spinacia_sp._CLP-2006         | DQ317033 |
| Caryophyllales | Caryophyllaceae | Gypsophila_repens             | EF547217 |
| Caryophyllales | Caryophyllaceae | Silene_aucaulis               | EF547218 |
| Caryophyllales | Caryophyllaceae | Silene_latifolia              | EF547221 |
| Caryophyllales | Caryophyllaceae | Silene_noctiflora             | EF547222 |
| Caryophyllales | Caryophyllaceae | Stellaria_sp._Qiu             | EF547228 |
| Caryophyllales | Droseraceae     | Aldrovanda-vesiculosa         | AY600107 |
| Caryophyllales | Droseraceae     | Dionaea_muscipula             | AY600108 |
| Caryophyllales | Droseraceae     | Drosera_capillaris            | AY600109 |
| Caryophyllales | Nepenthaceae    | Nepenthes_sp._Jobson_1049     | AY600110 |
| Caryophyllales | Plumbaginaceae  | Plumbago_sp._CLP-2006         | DQ317032 |

---

#### Rosids

|                 |                  |                         |          |
|-----------------|------------------|-------------------------|----------|
| Brassicales     | Brassicaceae     | Arabidopsis_thaliana    | X94583   |
| Brassicales     | Brassicaceae     | Brassica_juncea         | AY300014 |
| Brassicales     | Brassicaceae     | Brassica_napus          | AP006444 |
| Brassicales     | Brassicaceae     | Raphanus_sativus        | X57692   |
| Celastrales     | Celastraceae     | Brexia_madagascariensis | AJ223413 |
| Crossosomatales | Crossosomataceae | Crossosoma_bigelovii    | DQ317034 |
| Cucurbitales    | Cucurbitaceae    | Cucumis_sativus         | AJ223416 |
| Fabales         | Fabaceae         | Glycine_max             | M16884   |
| Fabales         | Fabaceae         | Pisum_sativum           | X14409   |
| Fabales         | Fabaceae         | Vigna_radiata           | AF338446 |
| Fagales         | Betulaceae       | Betula_papyrifera       | U77620   |
| Geraniales      | Geraniaceae      | Erodium_chrysanthum     | DQ317038 |
| Geraniales      | Geraniaceae      | Erodium_pelargoniflorum | DQ317039 |

|                      |                   |                              |          |
|----------------------|-------------------|------------------------------|----------|
| Geraniales           | Geraniaceae       | Erodium_trifolium            | DQ317040 |
| Geraniales           | Geraniaceae       | Geranium_himalayense         | AF193968 |
| Geraniales           | Geraniaceae       | Geranium_macrorrhizum        | DQ317035 |
| Geraniales           | Geraniaceae       | Monsonia_emarginata          | DQ317036 |
| Geraniales           | Geraniaceae       | Pelargonium_alchemilloides   | DQ317046 |
| Geraniales           | Geraniaceae       | Pelargonium_candicans        | DQ317043 |
| Geraniales           | Geraniaceae       | Pelargonium_capitatum        | DQ317044 |
| Geraniales           | Geraniaceae       | Pelargonium_cotyledonis      | DQ317041 |
| Geraniales           | Geraniaceae       | Pelargonium_quercetorum      | DQ317045 |
| Geraniales           | Geraniaceae       | Pelargonium_querifforme      | DQ317042 |
| Geraniales           | Geraniaceae       | Pelargonium_x_hortorum       | DQ317047 |
| Geraniales           | Geraniaceae       | Sarcocaulon_vanderietiae     | DQ317037 |
| Geraniales           | Hypseocharitaceae | Hypseocharis_pimpinellifolia | AF193967 |
| Malpighiales         | Euphorbiaceae     | Acalypha_sp._Qiu95079        | AJ247597 |
| Malpighiales         | Euphorbiaceae     | Croton_sp._Qiu_94027         | AJ247608 |
| Malpighiales         | Euphorbiaceae     | Euphorbia_milii              | AJ223418 |
| Malpighiales         | Euphorbiaceae     | Hevea_brasiliensis           | AJ223436 |
| Malpighiales         | Euphorbiaceae     | Hura_crepitans               | AJ247584 |
| Malpighiales         | Linaceae          | Linum_sp._Qiu96175           | AJ247604 |
| Malpighiales         | Malpighiaceae     | Malpighia_glabra             | AJ223433 |
| Malpighiales         | Phyllanthaceae    | Breynia_nivosa               | AJ247605 |
| Malpighiales         | Salicaceae        | Populus_tremuloides          | U77623   |
| Malpighiales         | Violaceae         | Viola_sp._Qiu95018           | AJ247600 |
| Malvales             | Dipterocarpaceae  | Shorea_talura                | AJ247599 |
| Myrtales             | Onagraceae        | Oenothera_berteriana         | X05465   |
| Myrtales             | Onagraceae        | Oenothera_biennis            | AF020571 |
| Oxalidales           | Cephalotaceae     | Cephalotus_follicularis      | AY600111 |
| Rosales              | Rhamnaceae        | Hovenia_dulcis               | AJ247583 |
| Rosales              | Rhamnaceae        | Rhamnus_cathartica           | AJ223422 |
| Rosales              | Urticaceae        | Pilea_fontana                | AJ247580 |
| Sapindales           | Burseraceae       | Bursera_sp._Qiu_94206        | AJ223412 |
| Sapindales           | Meliaceae         | Melia_toosendan              | AJ223420 |
| <b>Stem Eudicots</b> |                   |                              |          |
| Buxales              | Buxaceae          | Buxus_sp._Qiu_94069          | AF193962 |
| Proteales            | Nelumbonaceae     | Nelumbo_lutea                | AY009447 |
| Proteales            | Nelumbonaceae     | Nelumbo_nucifera             | AF193950 |
| Proteales            | Platanaceae       | Platanus_occidentalis        | AY009450 |
| Proteales            | Proteaceae        | Grevillea_robusta            | AY009449 |
| Ranunculales         | Eupteleaceae      | Euptelea_polyandra           | AF193963 |
| Ranunculales         | Fumariaceae       | Pseudofumaria_lutea          | AY009441 |
| Ranunculales         | Lardizabalaceae   | Akebia_quinata               | AY009429 |
| Ranunculales         | Ranunculaceae     | Clematis_sp._Qiu_95085       | AF193960 |
| Ranunculales         | Ranunculaceae     | Ranunculus_carolinianus      | AY009451 |
| Ranunculales         | Ranunculaceae     | Ranunculus_sp._Qiu_95024     | DQ317030 |
| Santalales           | Opiliaceae        | Lepionurus_sylvestris        | AJ223439 |
| Trochodendrales      | Tetracentraceae   | Tetracentron_sinense         | AY009455 |
| Trochodendrales      | Trochodendraceae  | Trochodendron_aralioides     | AF020581 |
| <b>Magnoliids</b>    |                   |                              |          |
| Canellales           | Canellaceae       | Canella_winterana            | AY009437 |
| Canellales           | Winteraceae       | Drimys_winteri               | AY009443 |
| Laurales             | Calycanthaceae    | Calycanthus_floridus         | AY009436 |
| Laurales             | Lauraceae         | Cinnamomum_verum             | AY009440 |
| Laurales             | Lauraceae         | Laurus_nobilis               | AF193956 |
| Magnoliales          | Annonaceae        | Asimina_triloba              | AY009433 |
| Magnoliales          | Annonaceae        | Polyalthia_suberosa          | AF193957 |
| Magnoliales          | Eupomatiaceae     | Eupomatia_laurina            | AY009444 |
| Magnoliales          | Magnoliaceae      | Liriodendron_tulipifera      | AF193959 |
| Magnoliales          | Magnoliaceae      | Magnolia_grandiflora         | AF020568 |

|                      |                  |                                |             |
|----------------------|------------------|--------------------------------|-------------|
| Magnoliales          | Magnoliaceae     | Magnolia_stellata              | U77622      |
| Magnoliales          | Myristicaceae    | Knema_latericia                | AJ223430    |
| Magnoliales          | Myristicaceae    | Myristica_fragrans             | AJ223434    |
| Piperales            | Aristolochiaceae | Aristolochia_elegans           | AY009431    |
| Piperales            | Aristolochiaceae | Asarum_canadense               | AY009432    |
| Piperales            | Lactoridaceae    | Lactoris_fernandeziana         | AY009446    |
| Piperales            | Piperaceae       | Peperomia_cubensis             | AF029783    |
| Piperales            | Piperaceae       | Peperomia_polybotrya           | X94594      |
| Piperales            | Piperaceae       | Piper_bicolor                  | AY009448    |
| Piperales            | Saururaceae      | Saururus_chinensis             | AY009452    |
| <b>Chloranthales</b> |                  |                                |             |
| Chloranthales        | Chloranthaceae   | Chloranthus_spicatus           | AY009439    |
| Chloranthales        | Chloranthaceae   | Sarcandra_grandifolia          | AF193958    |
| <b>Monocots</b>      |                  |                                |             |
| Acorales             | Acoraceae        | Acorus_calamus                 | AF193944    |
| Alismatales          | Alismataceae     | Alisma_sp. (CL Parkinson)      | unpublished |
| Alismatales          | Araceae          | Amorphophallus_konjac          | AJ007548    |
| Alismatales          | Araceae          | Anthurium_scherzerianum        | AJ007551    |
| Alismatales          | Araceae          | Arisaema_triphyllum            | AY009454    |
| Alismatales          | Araceae          | Dieffenbachia_sp._Qiu_96007    | AJ007549    |
| Alismatales          | Araceae          | Orontium_aquaticum             | AJ007554    |
| Alismatales          | Araceae          | Peltandra_virginica            | AJ007550    |
| Alismatales          | Araceae          | Philodendron_oxycardium        | AJ223438    |
| Alismatales          | Araceae          | Pistia_stratiotes              | AJ007546    |
| Alismatales          | Araceae          | Scindapsus_aureus              | AJ007552    |
| Alismatales          | Araceae          | Spathiphyllum_wallisii         | AJ007553    |
| Alismatales          | Araceae          | Xanthosoma_mafaffa             | AJ223807    |
| Alismatales          | Araceae          | Zamioculcas_zamiifolia         | AJ007547    |
| Alismatales          | Araceae          | Zantedeschia_aethiopica        | AJ007555    |
| Arecales             | Arecaceae        | Chamaerops_humilis             | U77621      |
| Arecales             | Arecaceae        | Phoenix_dactylifera            | AY166800    |
| Arecales             | Arecaceae        | Sabal_palmetto                 | U77624      |
| Asparagales          | Alliaceae        | Allium_sativum                 | AF356823    |
| Dioscoreales         | Dioscoreaceae    | Dioscorea_mexicana             | AY009442    |
| Poales               | Eriocaulaceae    | Lachnocaulon_anceps            | AY053574    |
| Poales               | Poaceae          | Aegilops_columnaris            | U46764      |
| Poales               | Poaceae          | Coix_lacryma-jobi              | DQ646384    |
| Poales               | Poaceae          | Elymus_sibiricus               | AJ296026    |
| Poales               | Poaceae          | Oryza_sativa                   | BA000029    |
| Poales               | Poaceae          | Secale_cereale                 | AM050161    |
| Poales               | Poaceae          | Sorghum_bicolor                | M14453      |
| Poales               | Poaceae          | Triticum_aestivum              | AP008982    |
| Poales               | Poaceae          | Zea_mays                       | AY506529    |
| Zingiberales         | Cannaceae        | Canna_paniculata               | AY673037    |
| Zingiberales         | Costaceae        | Costus_pulverulentus           | AY673038    |
| Zingiberales         | Heliconiaceae    | Heliconia_irrasa               | AY673039    |
| Zingiberales         | Lowiaceae        | Orchidantha_fimbriata          | AY673041    |
| Zingiberales         | Marantaceae      | Ataenidia_conferta             | AY673012    |
| Zingiberales         | Marantaceae      | Calathea_crotalifera           | AY673013    |
| Zingiberales         | Marantaceae      | Calathea_metallica             | AY673014    |
| Zingiberales         | Marantaceae      | Calathea_micans                | AY673015    |
| Zingiberales         | Marantaceae      | Calathea_rufibarba             | AY673016    |
| Zingiberales         | Marantaceae      | Calathea_warszewiczii          | AY673017    |
| Zingiberales         | Marantaceae      | Cominsia_gigantea              | AY673018    |
| Zingiberales         | Marantaceae      | Ctenanthe_setosa               | AY673019    |
| Zingiberales         | Marantaceae      | Donax_canniformis              | AY673020    |
| Zingiberales         | Marantaceae      | Haumania_sp._Harris_6672       | AY673021    |
| Zingiberales         | Marantaceae      | Hypselodelphys_sp._Harris_6670 | AY673022    |

|                         |                   |                              |          |
|-------------------------|-------------------|------------------------------|----------|
| Zingiberales            | Marantaceae       | Ischnosiphon_helenae         | AY673023 |
| Zingiberales            | Marantaceae       | Maranta_bicolor              | AY673024 |
| Zingiberales            | Marantaceae       | Maranta_leuconeura           | AJ223432 |
| Zingiberales            | Marantaceae       | Marantochloa_purpurea        | AY673025 |
| Zingiberales            | Marantaceae       | Monotagma_laxum              | AY673026 |
| Zingiberales            | Marantaceae       | Phrynium_imbricatum          | AY673027 |
| Zingiberales            | Marantaceae       | Plelostachya_pruinosa        | AY673029 |
| Zingiberales            | Marantaceae       | Saranthe_sp._Kress_96-5737   | AY673030 |
| Zingiberales            | Marantaceae       | Sarcophrynium_brachystachys  | AY673031 |
| Zingiberales            | Marantaceae       | Schumannianthus_dichotomus   | AY673032 |
| Zingiberales            | Marantaceae       | Schumannianthus_virgatus     | AY673033 |
| Zingiberales            | Marantaceae       | Stachyphrynium_repens        | AY673028 |
| Zingiberales            | Marantaceae       | Thalia_geniculata            | AY673034 |
| Zingiberales            | Marantaceae       | Thaumatococcus_daniellii     | AY673035 |
| Zingiberales            | Marantaceae       | Trachyphrynium_braunianum    | AY673036 |
| Zingiberales            | Musaceae          | Musa_nana                    | AJ247609 |
| Zingiberales            | Musaceae          | Musella_lasiocarpa           | AY673040 |
| Zingiberales            | Strelitziaceae    | Phenakospermum_guyanense     | AY673042 |
| Zingiberales            | Zingiberaceae     | Hedychium_coronarum          | AJ223426 |
| Zingiberales            | Zingiberaceae     | Siphonochilus_decorus        | AY673043 |
| <b>Ceratophyllales</b>  |                   |                              |          |
| Ceratophyllales         | Ceratophyllaceae  | Ceratophyllum_demersum       | AY009438 |
| <b>Stem Angiosperms</b> |                   |                              |          |
| Amborellales            | Amborellaceae     | Amborella_trichopoda         | AY009430 |
| Austrobaileyales        | Austrobaileyaceae | Austrobaileya_scandens       | AY009434 |
| Austrobaileyales        | Schisandraceae    | Illicium_lanceolatum         | AY009445 |
| Austrobaileyales        | Schisandraceae    | Kadsura_japonica             | AF193952 |
| Austrobaileyales        | Schisandraceae    | Schisandra_henryi            | AY009453 |
| Austrobaileyales        | Schisandraceae    | Schisandra_sphenanthera      | AF193951 |
| Austrobaileyales        | Trimeniaceae      | Trimenia_sp._CCWD-2000       | AY009456 |
| Nymphaeales             | Cabombaceae       | Cabomba_caroliniana          | AY009435 |
| Nymphaeales             | Cabombaceae       | Cabomba_sp._Palmer_688       | AF193949 |
| Nymphaeales             | Nymphaeaceae      | Euryale_sp._Palmer_790       | AF193947 |
| Nymphaeales             | Nymphaeaceae      | Nuphar_sp._Palmer_689        | AF193948 |
| Nymphaeales             | Nymphaeaceae      | Nymphaea_odorata             | AF020570 |
| Nymphaeales             | Nymphaeaceae      | Victoria_cf._amazonica       | AF193946 |
| <b>Gymnosperms</b>      |                   |                              |          |
| Coniferales             | Araucariaceae     | Agathis_australis            | AF020557 |
| Coniferales             | Araucariaceae     | Araucaria_heterophylla       | AF020558 |
| Coniferales             | Cephalotaxaceae   | Cephalotaxus_fortunei        | AF020559 |
| Coniferales             | Cupressaceae      | Cunninghamia_konishii        | AF020560 |
| Coniferales             | Cupressaceae      | Cupressus_corneyana          | AF020561 |
| Coniferales             | Cupressaceae      | Juniperus_procera            | AJ000357 |
| Coniferales             | Cupressaceae      | Juniperus_virginiana         | AF020567 |
| Coniferales             | Cupressaceae      | Metasequoia_glyptostroboides | AF020569 |
| Coniferales             | Cupressaceae      | Taxodium_distichum           | AF020578 |
| Coniferales             | Cupressaceae      | Thuja_plicata                | S48153   |
| Coniferales             | Pinaceae          | Abies_balsamea               | AY159838 |
| Coniferales             | Pinaceae          | Abies_bracteata              | AF020556 |
| Coniferales             | Pinaceae          | Larix_decidua                | DQ087872 |
| Coniferales             | Pinaceae          | Larix_gmelinii               | DQ087877 |
| Coniferales             | Pinaceae          | Larix_griffithiana           | DQ087879 |
| Coniferales             | Pinaceae          | Larix_kaempferi              | DQ087873 |
| Coniferales             | Pinaceae          | Larix_laricina               | DQ087871 |
| Coniferales             | Pinaceae          | Larix_lyallii                | DQ087875 |
| Coniferales             | Pinaceae          | Larix_mastersiana            | DQ087878 |
| Coniferales             | Pinaceae          | Larix_occidentalis           | DQ087876 |
| Coniferales             | Pinaceae          | Larix_potaninii              | DQ087880 |



|                |                 |                             |          |
|----------------|-----------------|-----------------------------|----------|
| Coniferales    | Pinaceae        | Larix_sibirica              | DQ087874 |
| Coniferales    | Pinaceae        | Larix_sp.                   | X94590   |
| Coniferales    | Pinaceae        | Picea_abies                 | AJ000356 |
| Coniferales    | Pinaceae        | Pinus_banksiana             | AY159844 |
| Coniferales    | Pinaceae        | Pinus_sibirica              | AJ000355 |
| Coniferales    | Pinaceae        | Pinus_strobus               | AF020574 |
| Coniferales    | Pinaceae        | Pinus_sylvestris            | AJ000354 |
| Coniferales    | Pinaceae        | Pseudotsuga_menziesii       | AY159841 |
| Coniferales    | Pinaceae        | Tsuga_canadensis            | AF020582 |
| Coniferales    | Podocarpaceae   | Phyllocladus_trichomanoides | AF020573 |
| Coniferales    | Podocarpaceae   | Podocarpus_macrophyllus     | AF020575 |
| Coniferales    | Podocarpaceae   | Podocarpus_oleifolius       | AY159842 |
| Coniferales    | Sciadopityaceae | Sciadopitys_verticillata    | AF020576 |
| Coniferales    | Taxaceae        | Taxus_baccata               | AF020579 |
| Coniferales    | Taxaceae        | Taxus_canadensis            | AY159840 |
| Coniferales    | Taxaceae        | Torreya_nucifera            | AF020580 |
| Cycadales      | Cycadaceae      | Cycas_revoluta              | AF020562 |
| Cycadales      | Stangeriaceae   | Stangeria_eriopus           | AF020577 |
| Cycadales      | Zamiaceae       | Encephalartos_lebomboensis  | AF020563 |
| Cycadales      | Zamiaceae       | Zamia_furfuracea            | AF020583 |
| Cycadales      | Zamiaceae       | Zamia_sp.                   | X94596   |
| Ephedrales     | Ephedraceae     | Ephedra_distachya           | AF020585 |
| Ephedrales     | Ephedraceae     | Ephedra_equisetifolia       | X94586   |
| Ephedrales     | Ephedraceae     | Ephedra_viridis             | AF020564 |
| Ginkgoales     | Ginkgoaceae     | Ginkgo_biloba               | AF020565 |
| Gnetales       | Gnetaceae       | Gnetum_leyboldii            | AF020566 |
| Welwitschiales | Welwitschiaceae | Welwitschia_mirabilis       | AF020584 |

---

**Table S4. Taxon information for figure 3**

| Asterids     |                  |                               |          |
|--------------|------------------|-------------------------------|----------|
| Apiales      | Apiaceae         | Petroselinum_crispum          | AY453081 |
| Apiales      | Griselinaceae    | Griselinia_racemosa           | AY453096 |
| Apiales      | Pittosporaceae   | Pittosporum_glabratum         | AF520127 |
| Aquifoliales | Aquifoliaceae    | Ilex_aquifolium               | AY453090 |
| Aquifoliales | Aquifoliaceae    | Ilex_repanda                  | AY725885 |
| Asterales    | Asteraceae       | Helianthus_annuus             | AY453114 |
| Asterales    | Campanulaceae    | Lobelia_holstii               | AF520151 |
| Asterales    | Goodeniaceae     | Scaevola_aemula               | AY453118 |
| Cornales     | Cornaceae        | Alangium_chinense             | AF520122 |
| Cornales     | Cornaceae        | Cornus_sericea                | AY725883 |
| Cornales     | Cornaceae        | Cornus_suecica                | AF420990 |
| Cornales     | Hydrangeaceae    | Deutzia_amurensis             | AF520126 |
| Cornales     | Hydrangeaceae    | Hydrangea_macrophylla         | AY453091 |
| Cornales     | Hydrangeaceae    | Hydrangea_sp._JS-2005         | AY725882 |
| Dipsacales   | Caprifoliaceae   | Lonicera_morrowii             | AY453088 |
| Dipsacales   | Dipsacaceae      | Dipsacus_fullonum             | AY453093 |
| Ericales     | Actinidiaceae    | Actinidia_arguta              | AF420991 |
| Ericales     | Actinidiaceae    | Actinidia_rubricaulis         | AY163745 |
| Ericales     | Balsaminaceae    | Impatiens_auriculata          | AF520117 |
| Ericales     | Balsaminaceae    | Impatiens_parviflora          | AF421011 |
| Ericales     | Clethraceae      | Clethra_alnifolia             | AF520204 |
| Ericales     | Clethraceae      | Clethra_arborea               | AF420996 |
| Ericales     | Clethraceae      | Clethra_barbinervis           | AF420997 |
| Ericales     | Clethraceae      | Clethra_delavayi_var._yuiana  | AY163746 |
| Ericales     | Cyrtillaceae     | Cyrtilla_racemiflora          | AY725892 |
| Ericales     | Diapensiaceae    | Berneuxia_thibetica           | AY049792 |
| Ericales     | Diapensiaceae    | Diapensia_lapponica           | AF421001 |
| Ericales     | Diapensiaceae    | Galax_urceolata               | AF421007 |
| Ericales     | Diapensiaceae    | Schizocodon_soldanelloides    | AF421030 |
| Ericales     | Diapensiaceae    | Shortia_exappendiculata       | AF421031 |
| Ericales     | Diapensiaceae    | Shortia_uniflora              | AY725895 |
| Ericales     | Ebenaceae        | Diospyros_digyna              | AF421002 |
| Ericales     | Ebenaceae        | Diospyros_mollifolia          | AF520202 |
| Ericales     | Ebenaceae        | Lissocarpa_guianensis         | AF421012 |
| Ericales     | Ericaceae        | Chimaphila_umbellata          | AF420994 |
| Ericales     | Ericaceae        | Empetrum_nigrum               | AF520113 |
| Ericales     | Ericaceae        | Enkianthus_campanulatus       | AF421004 |
| Ericales     | Ericaceae        | Pieris_formosa                | AF520123 |
| Ericales     | Ericaceae        | Rhododendron_tomentosum       | AF421026 |
| Ericales     | Ericaceae        | Vaccinium_uliginosum          | AF421035 |
| Ericales     | Ericaceae        | Vaccinium_vitis-idaea         | AF520124 |
| Ericales     | Fouquieriaceae   | Fouquieria_columnaris         | AY725887 |
| Ericales     | Fouquieriaceae   | Fouquieria_sp._Anderberg_s.n. | AF421006 |
| Ericales     | Lecythydaceae    | Barringtonia_asiatica         | AF420992 |
| Ericales     | Lecythydaceae    | Barringtonia_racemosa         | AY289672 |
| Ericales     | Lecythydaceae    | Couroupita_guianensis         | AY725890 |
| Ericales     | Lecythydaceae    | Napoleona_imperialis          | AF421041 |
| Ericales     | Lecythydaceae    | Napoleona_sp._JS-2005         | AY725891 |
| Ericales     | Maesaceae        | Maesa_tenera                  | AF421015 |
| Ericales     | Marcgraviaceae   | Marcgravia_sp._Anderberg_s.n. | AF421017 |
| Ericales     | Marcgraviaceae   | Norantea_peduncularis         | AF421020 |
| Ericales     | Mitrastemonaceae | Mitrastema_yamamotoi          | AY739011 |
| Ericales     | Myrsinaceae      | Aegiceras_corniculatum        | AY289673 |
| Ericales     | Myrsinaceae      | Ardisia_crenata               | AF520206 |
| Ericales     | Myrsinaceae      | Lysimachia_vulgaris           | AF421013 |
| Ericales     | Myrsinaceae      | Myrsine_africana              | AF421019 |

|          |                  |                                        |          |
|----------|------------------|----------------------------------------|----------|
| Ericales | Pellicieraceae   | Pelliciera_rhizophorae                 | AF421022 |
| Ericales | Pentaphragaceae  | Pentaphragax_euryoides                 | AF520096 |
| Ericales | Polemoniaceae    | Acanthogilia_gloriosa                  | AY725888 |
| Ericales | Polemoniaceae    | Cantua_buxifolia                       | AY725889 |
| Ericales | Polemoniaceae    | Cobaea_scandens                        | AF420999 |
| Ericales | Polemoniaceae    | Polemonium_caeruleum                   | AF421023 |
| Ericales | Primulaceae      | Primula_sikkimensis                    | AF421025 |
| Ericales | Primulaceae      | Primula_sp._YJB-2002                   | AF520114 |
| Ericales | Roridulaceae     | Roridula_gorgonias                     | AF421036 |
| Ericales | Sapotaceae       | Eberhardtia_aurata                     | AF520116 |
| Ericales | Sapotaceae       | Eberhardtia_tonkinensis                | AY163750 |
| Ericales | Sapotaceae       | Madhuca_microphylla                    | AF421014 |
| Ericales | Sapotaceae       | Manilkara_zapota                       | AF421016 |
| Ericales | Sapotaceae       | Monothea_buxifolia                     | AF421018 |
| Ericales | Sapotaceae       | Palaquium_formosanum                   | AF421021 |
| Ericales | Sapotaceae       | Planchonella_obovata                   | AF421024 |
| Ericales | Sapotaceae       | Sarcosperma_laurinum                   | AF421039 |
| Ericales | Sarraceniaceae   | Darlingtonia_californica               | AY163751 |
| Ericales | Sarraceniaceae   | Heliophora_sp._Anderberg_s.n.          | AF421010 |
| Ericales | Sarraceniaceae   | Sarracenia_flava                       | AF421028 |
| Ericales | Sladeniaceae     | Ficalhoa_laurifolia                    | AF421037 |
| Ericales | Sladeniaceae     | Sladenia_celastrifolia                 | AF520115 |
| Ericales | Styracaceae      | Bruinsmia_styracoides                  | AY725894 |
| Ericales | Styracaceae      | Halesia_carolina                       | AF421009 |
| Ericales | Styracaceae      | Styrax_grandiflorus                    | AF520205 |
| Ericales | Styracaceae      | Styrax_officinalis                     | AF421032 |
| Ericales | Symplocaceae     | Symplocos_hookeri                      | AY163753 |
| Ericales | Symplocaceae     | Symplocos_setchuensis                  | AF520111 |
| Ericales | Symplocaceae     | Symplocos_sp._Chung_and_Anderberg_1351 | AF421038 |
| Ericales | Symplocaceae     | Symplocos_zizyphoides                  | AY725893 |
| Ericales | Ternstroemiaceae | Adinandra_hirta                        | AY163739 |
| Ericales | Ternstroemiaceae | Anneslea_fragrans                      | AY163734 |
| Ericales | Ternstroemiaceae | Archytaea_multiflora                   | AY674475 |
| Ericales | Ternstroemiaceae | Cleyera_japonica                       | AF420998 |
| Ericales | Ternstroemiaceae | Cleyera_pachyphylla                    | AY163737 |
| Ericales | Ternstroemiaceae | Eurya_handel-mazzettii                 | AY163748 |
| Ericales | Ternstroemiaceae | Eurya_sp._Chung_&_Anderberg_1406       | AF421005 |
| Ericales | Ternstroemiaceae | Euryodendron_excelsum                  | AY163733 |
| Ericales | Ternstroemiaceae | Ternstroemia_gymnanthera               | AY163754 |
| Ericales | Tetrameristaceae | Pentamerista_neotropica                | AY725886 |
| Ericales | Theaceae         | Aptosperma_oblata                      | AY163755 |
| Ericales | Theaceae         | Camellia_henryana_var._trichocarpa     | AY163729 |
| Ericales | Theaceae         | Camellia_sinensis                      | AF421034 |
| Ericales | Theaceae         | Camellia_sp._YJB-2002                  | AF520203 |
| Ericales | Theaceae         | Camellia_yunnanensis_var._camellioides | AY163744 |
| Ericales | Theaceae         | Franklinia_alatamaha                   | AY163731 |
| Ericales | Theaceae         | Gordonia_axillaris                     | AF421008 |
| Ericales | Theaceae         | Gordonia_lasianthus                    | AY163735 |
| Ericales | Theaceae         | Parapyrenaria_multisepala              | AY163742 |
| Ericales | Theaceae         | Polyspora_chrysantra                   | AY163741 |
| Ericales | Theaceae         | Polyspora_tonkinensis                  | AY163728 |
| Ericales | Theaceae         | Schima_khasiana                        | AY163740 |
| Ericales | Theaceae         | Schima_superba                         | AF421029 |
| Ericales | Theaceae         | Sinopyrenaria_yunnanensis              | AY163730 |
| Ericales | Theaceae         | Stewartia_gemmata                      | AY163732 |
| Ericales | Theaceae         | Stewartia_pteropetiolata               | AY163738 |
| Ericales | Theaceae         | Stewartia_serrata                      | AY163736 |
| Ericales | Theaceae         | Tutcheria_spectabilis                  | AY163743 |

|                      |                    |                               |               |
|----------------------|--------------------|-------------------------------|---------------|
| Ericales             | Theophrastaceae    | Clavija_domingensis           | AF420995      |
| Ericales             | Theophrastaceae    | Samolus_repens                | AF421027      |
| Garryales            | Aucubaceae         | Aucuba_himalaica              | AY453099      |
| Garryales            | Aucubaceae         | Aucuba_japonica               | AY725884      |
| Garryales            | Eucommiaceae       | Eucommia_ulmoides             | AF520125      |
| Garryales            | Garryaceae         | Garrya_elliptica              | AY453095      |
| Gentianales          | Apocynaceae        | Asclepias_tuberosa            | AY453103      |
| Gentianales          | Apocynaceae        | Cerbera_manghas               | AY289670      |
| Gentianales          | Apocynaceae        | Gomphocarpus_physocarpus      | AF520144      |
| Gentianales          | Apocynaceae        | Vinca_minor                   | AF520143      |
| Gentianales          | Rubiaceae          | Pentas_sp._Barkman_362        | AY453079      |
| Gentianales          | Rubiaceae          | Scyphiphora_hydrophyllacea    | AY289671      |
| Lamiales             | Acanthaceae        | Acanthus_ebracteatus          | AY289667      |
| Lamiales             | Acanthaceae        | Avicennia_marina              | AY289666      |
| Lamiales             | Acanthaceae        | Blepharis_hildebrandtii       | AF520153      |
| Lamiales             | Bignoniaceae       | Dolichandrone_spathacea       | AY289668      |
| Lamiales             | Bignoniaceae       | Jacaranda_mimosifolia         | AF520145      |
| Lamiales             | Lamiaceae          | Clerodendrum_inerme           | AY289669      |
| Lamiales             | Lamiaceae          | Monarda_didyma                | AY453085      |
| Lamiales             | Oleaceae           | Jasminum_abyssinicum          | AF520152      |
| Lamiales             | Plantaginaceae     | Antirrhinum_majus             | AY453102      |
| Lamiales             | Plantaginaceae     | Plantago_lanceolata           | unpubl. (JPM) |
| Solanales            | Solanaceae         | Nicotiana_sylvestris          | AY453113      |
| Solanales            | Solanaceae         | Nicotiana_tabacum             | BA000042      |
| Solanales            | Solanaceae         | Solanum_tuberosum             | AJ003130      |
| Solanales            | Solanaceae         | Withania_somnifera            | AF520149      |
| Unplaced             | Icacinaceae        | Mappianthus_iodoides          | AF520167      |
| <b>Caryophyllids</b> |                    |                               |               |
| Caryophyllales       | Amaranthaceae      | Bassia_scoparia               | AF520130      |
| Caryophyllales       | Amaranthaceae      | Beta_vulgaris_subsp._vulgaris | BA000009      |
| Caryophyllales       | Amaranthaceae      | Spinacia_oleracea             | AY453110      |
| Caryophyllales       | Basellaceae        | Basella_alba                  | AF520150      |
| Caryophyllales       | Didiereaceae       | Alluaudia_humbertii           | AF520129      |
| Caryophyllales       | Nepenthaceae       | Nepenthes_mirabilis           | AF520128      |
| Caryophyllales       | Nyctaginaceae      | Mirabilis_jalapa              | AY453086      |
| Caryophyllales       | Plumbaginaceae     | Aegialitis_annulata           | AY289665      |
| Caryophyllales       | Portulacaceae      | Portulacaria_afra             | AF520131      |
| Caryophyllales       | Tamaricaceae       | Tamarix_chinensis             | AF520098      |
| Caryophyllales       | Tamaricaceae       | Tamarix_parviflora            | AY453117      |
| Dilleniales          | Dilleniaceae       | Dillenia_indica               | AF520095      |
| Dilleniales          | Dilleniaceae       | Tetracera_asiatica            | AF520094      |
| <b>Rosids</b>        |                    |                               |               |
| Brassicales          | Brassicaceae       | Arabidopsis_thaliana          | Y08501        |
| Brassicales          | Brassicaceae       | Brassica_napus                | AP006444      |
| Brassicales          | Brassicaceae       | Capsella_bursa-pastoris       | AF520121      |
| Brassicales          | Bretschneideraceae | Bretschneidera_sinensis       | AF520118      |
| Brassicales          | Capparaceae        | Capparis_membranifolia        | AF520146      |
| Brassicales          | Caricaceae         | Carica_papaya                 | AF520141      |
| Brassicales          | Tropaeolaceae      | Tropaeolum_majus              | AF520137      |
| Celastrales          | Celastraceae       | Brexia_madagascariensis       | AY674482      |
| Celastrales          | Celastraceae       | Celastrus_orbiculatus         | AY121493      |
| Celastrales          | Celastraceae       | Celastrus_scandens            | AY674488      |
| Celastrales          | Celastraceae       | Elaeodendron_orientale        | AY674506      |
| Celastrales          | Celastraceae       | Euonymus_alatus               | AY674511      |
| Celastrales          | Celastraceae       | Euonymus_bungeanus            | AY121492      |
| Celastrales          | Celastraceae       | Euonymus_fortunei             | AY453104      |
| Celastrales          | Celastraceae       | Maytenus_arbutifolia          | AY674538      |
| Celastrales          | Celastraceae       | Paxistima_canbyi              | AY674548      |

|                 |                  |                             |          |
|-----------------|------------------|-----------------------------|----------|
| Celastrales     | Celastraceae     | Salacia_sessiliflora        | AY121503 |
| Celastrales     | Celastraceae     | Stackhousia_minima          | AY121497 |
| Celastrales     | Celastraceae     | Tripterococcus_brunonis     | AY121496 |
| Celastrales     | Celastraceae     | Tripterygium_regelii        | AY674568 |
| Celastrales     | Parnassiaceae    | Parnassia_palustris         | AY121491 |
| Celastrales     | Parnassiaceae    | Parnassia_sp._Wurdack_D795  | AY674546 |
| Crossosomatales | Stachyuraceae    | Stachyurus_chinensis        | AY121489 |
| Crossosomatales | Staphyleaceae    | Euscaphis_japonica          | AF520104 |
| Crossosomatales | Staphyleaceae    | Staphylea_trifolia          | AF520105 |
| Cucurbitales    | Anisophylleaceae | Anisophyllea_manausensis    | AY121498 |
| Cucurbitales    | Apodanthaceae    | Apodanthes_caseariae        | AY739002 |
| Cucurbitales    | Apodanthaceae    | Pilostyles_thurberi         | AY739003 |
| Cucurbitales    | Begoniaceae      | Begonia_hybrid_cultivar     | AY453119 |
| Cucurbitales    | Begoniaceae      | Begonia_laciniata           | AY121500 |
| Cucurbitales    | Coriariaceae     | Coriaria_nepalensis         | AY121501 |
| Cucurbitales    | Corynocarpaceae  | Corynocarpus_laevigata      | AY121499 |
| Cucurbitales    | Cucurbitaceae    | Cucurbita_pepo              | AY453101 |
| Cucurbitales    | Cucurbitaceae    | Hemsleya_lijiangensis       | AF520174 |
| Cucurbitales    | Cucurbitaceae    | Luffa_aegyptiaca            | AF520173 |
| Cucurbitales    | Cucurbitaceae    | Thladiantha_dubia           | AF520175 |
| Cucurbitales    | Tetrameleaceae   | Tetrameles_nudiflora        | AF520172 |
| Fabales         | Fabaceae         | Albizia_schimperiana        | AF520168 |
| Fabales         | Fabaceae         | Cynometra_iripa             | AY289656 |
| Fabales         | Fabaceae         | Glycine_max                 | U09988   |
| Fabales         | Fabaceae         | Glycine_soja                | AF520177 |
| Fabales         | Fabaceae         | Julbernardia_globiflora     | AY739016 |
| Fabales         | Fabaceae         | Pisum_sativum               | AY453078 |
| Fabales         | Fabaceae         | Pongamia_pinnata            | AY289655 |
| Fabales         | Fabaceae         | Thermopsis_chinensis        | AF520176 |
| Fabales         | Fabaceae         | Vicia_faba                  | M30176   |
| Fabales         | Fabaceae         | Zenia_insignis              | AF520161 |
| Fabales         | Polygalaceae     | Polygala_paucifolia         | AY453080 |
| Fabales         | Polygalaceae     | Polygala_tatarinowii        | AF520179 |
| Fabales         | Polygalaceae     | Xanthophyllum_hainanense    | AF520178 |
| Fagales         | Betulaceae       | Alnus_henryi                | AF520062 |
| Fagales         | Betulaceae       | Alnus_sinuata               | AY263907 |
| Fagales         | Betulaceae       | Betula_albosinensis         | AF520063 |
| Fagales         | Betulaceae       | Betula_pendula              | AY453121 |
| Fagales         | Betulaceae       | Betula_platyphylla          | AY263908 |
| Fagales         | Betulaceae       | Carpinus_betulus            | AY263910 |
| Fagales         | Betulaceae       | Carpinus_polyneura          | AF520065 |
| Fagales         | Betulaceae       | Corylus_avellana            | AF520067 |
| Fagales         | Betulaceae       | Ostrya_carpinifolia         | AF520064 |
| Fagales         | Betulaceae       | Ostryopsis_davidiana        | AF520066 |
| Fagales         | Casuarinaceae    | Casuarina_equisetifolia     | AF520069 |
| Fagales         | Fagaceae         | Castanea_seguinii           | AF520078 |
| Fagales         | Fagaceae         | Castanopsis_tibetana        | AY263912 |
| Fagales         | Fagaceae         | Chrysolepis_sempervirens    | AY147114 |
| Fagales         | Fagaceae         | Fagus_engleriana            | AF520082 |
| Fagales         | Fagaceae         | Fagus_grandifolia           | AY263909 |
| Fagales         | Fagaceae         | Fagus_sylvatica             | AY453092 |
| Fagales         | Fagaceae         | Lithocarpus_henryi          | AF520081 |
| Fagales         | Fagaceae         | Quercus_engleriana          | AF520079 |
| Fagales         | Fagaceae         | Quercus_multinervis         | AY263911 |
| Fagales         | Fagaceae         | Trigonobalanus_verticillata | AF520080 |
| Fagales         | Juglandaceae     | Alfaroa_guanacastensis      | AF520076 |
| Fagales         | Juglandaceae     | Annamocarya_sinensis        | AY263913 |
| Fagales         | Juglandaceae     | Carya_ovata                 | AF520070 |

|              |                  |                                     |          |
|--------------|------------------|-------------------------------------|----------|
| Fagales      | Juglandaceae     | Cyclocarya_paliurus                 | AF520071 |
| Fagales      | Juglandaceae     | Engelhardia_fenzelii                | AF520072 |
| Fagales      | Juglandaceae     | Juglans_mandshurica                 | AF520073 |
| Fagales      | Juglandaceae     | Oreomunnea_mexicana                 | AF520083 |
| Fagales      | Juglandaceae     | Platycarya_strobilacea              | AF520074 |
| Fagales      | Juglandaceae     | Pterocarya_hupehensis               | AF520075 |
| Fagales      | Myricaceae       | Comptonia_peregrina                 | AY147115 |
| Fagales      | Myricaceae       | Morella_cerifera                    | AF520084 |
| Fagales      | Nothofagaceae    | Nothofagus_dombeyi                  | AF520085 |
| Fagales      | Rhoipteleaceae   | Rhoiptelea_chiliantha               | AF520077 |
| Fagales      | Ticodendraceae   | Ticodendron_incognitum              | AF520068 |
| Geraniales   | Geraniaceae      | Geranium_wilfordii                  | AY121488 |
| Geraniales   | Melianthaceae    | Melianthus_major                    | AY453087 |
| Huerteales   | Dipentodontaceae | Dipentodon_sinicus                  | AY121494 |
| Huerteales   | Tapisciaceae     | Tapiscia_sinensis                   | AF520103 |
| Malpighiales | Achariaceae      | Acharia_tragodes                    | AY674472 |
| Malpighiales | Achariaceae      | Kiggelaria_sp._Alford_51            | AY674527 |
| Malpighiales | Balanopaceae     | Balanops_vieillardii                | AF520180 |
| Malpighiales | Caryocaraceae    | Caryocar_glabrum                    | AF520181 |
| Malpighiales | Chrysobalanaceae | Atuna_racemosa                      | AY674476 |
| Malpighiales | Chrysobalanaceae | Chrysobalanus_icaco                 | AY674491 |
| Malpighiales | Chrysobalanaceae | Couepia_robusta                     | AF520182 |
| Malpighiales | Chrysobalanaceae | Hirtella_bicornis                   | AY674520 |
| Malpighiales | Chrysobalanaceae | Licania_michauxii                   | AY674532 |
| Malpighiales | Clusiaceae       | Calophyllum_soulattri               | AY674484 |
| Malpighiales | Clusiaceae       | Clusia_gundlachii                   | AY674493 |
| Malpighiales | Clusiaceae       | Hypericum_ascyron                   | AF520190 |
| Malpighiales | Clusiaceae       | Hypericum_empetrifolium             | AY674525 |
| Malpighiales | Clusiaceae       | Mesua_ferrea                        | AF520183 |
| Malpighiales | Clusiaceae       | Mesua_sp._Coode_7884                | AY674540 |
| Malpighiales | Clusiaceae       | Vismia_sp._Miller_et_al._9313       | AY674571 |
| Malpighiales | Ctenolophonaceae | Ctenolophon_englerianus             | AY674499 |
| Malpighiales | Dichapetalaceae  | Dichapetalum_macrocarpum            | AY674502 |
| Malpighiales | Elatinaceae      | Bergia_texana                       | AY674480 |
| Malpighiales | Elatinaceae      | Elatine_triandra                    | AY674507 |
| Malpighiales | Erythroxylaceae  | Erythroxylum_coca                   | AY674509 |
| Malpighiales | Euphorbiaceae    | Clutia_pulchella                    | AY674494 |
| Malpighiales | Euphorbiaceae    | Codiaeum_variegatum                 | AY674495 |
| Malpighiales | Euphorbiaceae    | Conceveiba_martiana                 | AY674496 |
| Malpighiales | Euphorbiaceae    | Croton_alabamensis_var._alabamensis | AY674498 |
| Malpighiales | Euphorbiaceae    | Endospermum_moluccanum              | AY674508 |
| Malpighiales | Euphorbiaceae    | Euphorbia_polychroma                | AY674512 |
| Malpighiales | Euphorbiaceae    | Excoecaria_agallocha                | AY289654 |
| Malpighiales | Euphorbiaceae    | Hevea_sp._Gillespie_4272            | AY674519 |
| Malpighiales | Euphorbiaceae    | Homalanthus_populneus               | AY674521 |
| Malpighiales | Euphorbiaceae    | Neoscortechinia_kingii              | AY674543 |
| Malpighiales | Euphorbiaceae    | Pera_bicolor                        | AY674549 |
| Malpighiales | Euphorbiaceae    | Ricinus_communis                    | AY674560 |
| Malpighiales | Euphorbiaceae    | Euphonia_guianensis                 | AY674513 |
| Malpighiales | Goupiaceae       | Goupia_glabra                       | AY674516 |
| Malpighiales | Humiriaceae      | Humiria_balsamifera                 | AY674523 |
| Malpighiales | Humiriaceae      | Vantanea_guianensis                 | AY674570 |
| Malpighiales | Ixonanthaceae    | Ixonanthes_chinensis                | AY674526 |
| Malpighiales | Ixonanthaceae    | Ochthocosmus_longipedicellatus      | AY674545 |
| Malpighiales | Lacistemataceae  | Lacistema_aggregatum                | AY674529 |
| Malpighiales | Linaceae         | Hugonia_platysepala                 | AY674522 |
| Malpighiales | Linaceae         | Linum_arboreum                      | AY674533 |
| Malpighiales | Linaceae         | Reinwardtia_indica                  | AF520164 |

|              |                 |                                             |          |
|--------------|-----------------|---------------------------------------------|----------|
| Malpighiales | Lophopyxidaceae | Lophopyxis_maingayi                         | AY674534 |
| Malpighiales | Malesherbiaceae | Malesherbia_linearifolia                    | AY674536 |
| Malpighiales | Malpighiaceae   | Dicella_nucifera                            | AY674501 |
| Malpighiales | Malpighiaceae   | Malpighia_glauca                            | AF520187 |
| Malpighiales | Malpighiaceae   | Thryallis_longifolia                        | AY674566 |
| Malpighiales | Medusagynaceae  | Medusagyne_oppositifolia                    | AY674539 |
| Malpighiales | Ochnaceae       | Cespedesia_bonplandii                       | AY674490 |
| Malpighiales | Ochnaceae       | Ochna_integerrima                           | AF520166 |
| Malpighiales | Ochnaceae       | Ochna_sp._Davis_31-01                       | AY674544 |
| Malpighiales | Pandaceae       | Galearia_filiformis                         | AY674515 |
| Malpighiales | Pandaceae       | Microdesmis_puberula                        | AY674542 |
| Malpighiales | Passifloraceae  | Paropsia_madagascariensis                   | AY674547 |
| Malpighiales | Passifloraceae  | Passiflora_edulis                           | AF520188 |
| Malpighiales | Phyllanthaceae  | Bischofia_javanica                          | AF520184 |
| Malpighiales | Phyllanthaceae  | Drypetes_perreticulata                      | AF520185 |
| Malpighiales | Phyllanthaceae  | Phyllanthus_epiphyllanthus                  | AY674552 |
| Malpighiales | Phyllanthaceae  | Putranjiva_roxburghii                       | AY674505 |
| Malpighiales | Picrodendraceae | Androstachys_johnsonii                      | AY674474 |
| Malpighiales | Picrodendraceae | Austrobuxus_megacarpus                      | AY674477 |
| Malpighiales | Picrodendraceae | Dissiliaria_muelleri                        | AY674503 |
| Malpighiales | Picrodendraceae | Micranthemum_hexandrum                      | AY674541 |
| Malpighiales | Picrodendraceae | Petalostigma_pubescens                      | AY674551 |
| Malpighiales | Picrodendraceae | Podocalyx_loranthoides                      | AY674553 |
| Malpighiales | Picrodendraceae | Stachystemon_axillaris                      | AY674563 |
| Malpighiales | Podostemaceae   | Marathrum_cf._oxycarpum_da_Cachoeira_9/1996 | AY674537 |
| Malpighiales | Quiinaceae      | Quiina_pteridophylla                        | AY674558 |
| Malpighiales | Rafflesiaceae   | Rafflesia_keithii                           | AY739007 |
| Malpighiales | Rafflesiaceae   | Rafflesia_pricei                            | AY739008 |
| Malpighiales | Rafflesiaceae   | Rafflesia_tuan-mudae                        | AY739009 |
| Malpighiales | Rafflesiaceae   | Rhizanthus_infanticida                      | AY739010 |
| Malpighiales | Rafflesiaceae   | Rhizanthus_zippelii                         | AY453073 |
| Malpighiales | Rafflesiaceae   | Sapria_himalayana                           | AY739006 |
| Malpighiales | Rafflesiaceae   | Sapria_poilanei                             | AY739004 |
| Malpighiales | Rafflesiaceae   | Sapria_ram                                  | AY739005 |
| Malpighiales | Rhizophoraceae  | Bruguiera_gymnorhiza                        | AY674483 |
| Malpighiales | Rhizophoraceae  | Bruguiera_sexangula                         | AY289652 |
| Malpighiales | Rhizophoraceae  | Carallia_brachiata                          | AF520189 |
| Malpighiales | Rhizophoraceae  | Ceriops_tagal                               | AY289650 |
| Malpighiales | Rhizophoraceae  | Kandelia_candel                             | AY289651 |
| Malpighiales | Rhizophoraceae  | Rhizophora_stylosa                          | AY289653 |
| Malpighiales | Salicaceae      | Abatia_parviflora                           | AY674471 |
| Malpighiales | Salicaceae      | Casearia_sylvestris                         | AY674487 |
| Malpighiales | Salicaceae      | Dovyalis_rhamnoides                         | AY674504 |
| Malpighiales | Salicaceae      | Flacourtia_jangomas                         | AY674514 |
| Malpighiales | Salicaceae      | Flacourtia_ramontchii                       | AF520186 |
| Malpighiales | Salicaceae      | Hasseltia_sp._Alford_28                     | AY674518 |
| Malpighiales | Salicaceae      | Lunania_sp._Alford_69                       | AY674535 |
| Malpighiales | Salicaceae      | Poliothyrsis_sp._Alford_44                  | AY674555 |
| Malpighiales | Salicaceae      | Populus_maximowiczii                        | AY674556 |
| Malpighiales | Salicaceae      | Prockia_sp._Alford_85                       | AY674557 |
| Malpighiales | Salicaceae      | Salix_babylonica                            | AY453072 |
| Malpighiales | Salicaceae      | Salix_raddeana                              | AF520191 |
| Malpighiales | Salicaceae      | Scyphostegia_borneensis                     | AY674562 |
| Malpighiales | Trigoniaceae    | Trigonia_nivea                              | AY674567 |
| Malpighiales | Turneraceae     | Turnera_ulmifolia                           | AY674569 |
| Malpighiales | Violaceae       | Hybanthus_sp._Alford_89                     | AY674524 |
| Malpighiales | Violaceae       | Leonia_glycycarpa                           | AY674531 |
| Malpighiales | Violaceae       | Viola_acuminata                             | AF520192 |

|              |                  |                          |          |
|--------------|------------------|--------------------------|----------|
| Malpighiales | Violaceae        | Viola_cucullata          | AY453070 |
| Malvales     | Bixaceae         | Bixa_orellana            | AF520136 |
| Malvales     | Cistaceae        | Hudsonia_tomentosa       | AY453097 |
| Malvales     | Cytinaceae       | Bdallophytum_americanum  | AY739012 |
| Malvales     | Cytinaceae       | Cytinus_ruber            | AY739013 |
| Malvales     | Dipterocarpaceae | Hopea_hainanensis        | AF520138 |
| Malvales     | Dipterocarpaceae | Vatica_mangachapoi       | AF520132 |
| Malvales     | Malvaceae        | Abutilon_x_hybridum      | AY739014 |
| Malvales     | Malvaceae        | Alcea_rosea              | AY453094 |
| Malvales     | Malvaceae        | Bombax_malabaricum       | AF520148 |
| Malvales     | Malvaceae        | Excentrodendron_hsienmu  | AF520158 |
| Malvales     | Malvaceae        | Heritiera_littoralis     | AY289659 |
| Malvales     | Malvaceae        | Hibiscus_tiliaceus       | AY289657 |
| Malvales     | Malvaceae        | Pavonia_spinifex         | AY739015 |
| Malvales     | Malvaceae        | Sida_cordata             | AF520139 |
| Malvales     | Malvaceae        | Thespesia_populnea       | AY289658 |
| Malvales     | Malvaceae        | Tilia_mandshurica        | AF520107 |
| Malvales     | Thymelaeaceae    | Aquilaria_sinensis       | AF520171 |
| Myrtales     | Combretaceae     | Conocarpus_erectus       | AY289662 |
| Myrtales     | Combretaceae     | Laguncularia_racemosa    | AY289661 |
| Myrtales     | Combretaceae     | Lumnitzera_littorea      | AY289663 |
| Myrtales     | Combretaceae     | Quisqualis_indica        | AF520133 |
| Myrtales     | Crypteroniaceae  | Crypteronia_paniculata   | AF520119 |
| Myrtales     | Lythraceae       | Duabanga_grandiflora     | AF520142 |
| Myrtales     | Lythraceae       | Lythrum_salicaria        | AF520110 |
| Myrtales     | Lythraceae       | Punica_granatum          | AY121502 |
| Myrtales     | Lythraceae       | Sonneratia_ovata         | AY289664 |
| Myrtales     | Melastomataceae  | Melastoma_candidum       | AF520134 |
| Myrtales     | Onagraceae       | Epilobium_hirsutum       | AF520108 |
| Myrtales     | Onagraceae       | Oenothera_berteroana     | M63034   |
| Myrtales     | Onagraceae       | Oenothera_biennis        | AY453083 |
| Oxalidales   | Cephalotaceae    | Cephalotus_follicularis  | AF520193 |
| Oxalidales   | Connaraceae      | Agelaea_trinervis        | AF520195 |
| Oxalidales   | Connaraceae      | Rourea_minor             | AF520194 |
| Oxalidales   | Cunoniaceae      | Eucryphia_milliganii     | AY674510 |
| Oxalidales   | Cunoniaceae      | Schizomeria_serrata      | AF520196 |
| Oxalidales   | Elaeocarpaceae   | Crinodendron_hookerianum | AY674497 |
| Oxalidales   | Elaeocarpaceae   | Elaeocarpus_apiculatus   | AF520197 |
| Oxalidales   | Oxalidaceae      | Averrhoa_carambola       | AY674478 |
| Oxalidales   | Oxalidaceae      | Dapania_racemosa         | AY674500 |
| Oxalidales   | Oxalidaceae      | Oxalis_corniculata       | AY453111 |
| Oxalidales   | Oxalidaceae      | Oxalis_corymbosa         | AF520198 |
| Rosales      | Barbeyaceae      | Barbeya_oleoides         | AF520199 |
| Rosales      | Cannabaceae      | Humulus_japonicus        | AF520091 |
| Rosales      | Moraceae         | Maclura_tricuspidata     | AF520093 |
| Rosales      | Moraceae         | Morus_alba               | AY453084 |
| Rosales      | Rhamnaceae       | Hovenia_acerba           | AF520156 |
| Rosales      | Rhamnaceae       | Paliurus_hemsleyanus     | AF520200 |
| Rosales      | Rosaceae         | Exochorda_racemosa       | AF520159 |
| Rosales      | Rosaceae         | Prinsepia_uniflora       | AF520088 |
| Rosales      | Rosaceae         | Taihangia_rupestris      | AF520201 |
| Rosales      | Ulmaceae         | Celtis_bungeana          | AF520086 |
| Rosales      | Ulmaceae         | Celtis_philippensis      | AY263906 |
| Rosales      | Ulmaceae         | Hemiptelea_davidii       | AF520160 |
| Rosales      | Ulmaceae         | Ulmus_americana          | AY453107 |
| Rosales      | Ulmaceae         | Zelkova_serrata          | AF520089 |
| Rosales      | Urticaceae       | Cecropia_peltata         | AF520157 |
| Rosales      | Urticaceae       | Debregeasia_salicifolia  | AF520090 |



|               |                 |                               |          |
|---------------|-----------------|-------------------------------|----------|
| Sapindales    | Anacardiaceae   | Rhus_typhina                  | AY453075 |
| Sapindales    | Burseraceae     | Canarium_tramdenum            | AF520140 |
| Sapindales    | Meliaceae       | Aglaiia_odorata               | AF520147 |
| Sapindales    | Meliaceae       | Xylocarpus_granatum           | AY289660 |
| Sapindales    | Rutaceae        | Citrus_sinensis               | AY453100 |
| Sapindales    | Rutaceae        | Ptelea_trifoliata             | AF520109 |
| Sapindales    | Rutaceae        | Skimmia_japonica              | AF520162 |
| Sapindales    | Sapindaceae     | Acer_mono                     | AF520112 |
| Sapindales    | Sapindaceae     | Koelreuteria_bipinnata        | AF520120 |
| Sapindales    | Simaroubaceae   | Ailanthus_altissima           | AF520106 |
| Sapindales    | Simaroubaceae   | Brucea_javanica               | AF520135 |
| Sapindales    | Simaroubaceae   | Klainedoxa_gabonensis         | AY674528 |
| Sapindales    | Simaroubaceae   | Picrasma_quassioides          | AF520154 |
| Saxifragales  | Crassulaceae    | Sedum_sarmentosum             | AF520100 |
| Saxifragales  | Cynomoriaceae   | Cynomorium_coccineum          | AY957446 |
| Saxifragales  | Hamamelidaceae  | Hamamelis_japonica_f_obtusata | AF520087 |
| Saxifragales  | Hamamelidaceae  | Hamamelis_venalis             | AY453082 |
| Saxifragales  | Iteaceae        | Itea_yunnanensis              | AF520099 |
| Saxifragales  | Paeoniaceae     | Paeonia_japonica              | AF520101 |
| Saxifragales  | Peridiscaceae   | Peridiscus_lucidus            | AY674550 |
| Unplaced      | Huaceae         | Afrostyrax_sp_Cheek_5007      | AY121495 |
| Unplaced      | Huaceae         | Hua_gabonii                   | AY121490 |
| Vitales       | Vitaceae        | Cissus_quadrangularis         | AF520170 |
| Vitales       | Vitaceae        | Cissus_sicyoides              | AY674492 |
| Vitales       | Vitaceae        | Leea_guineensis               | AY674530 |
| Vitales       | Vitaceae        | Leea_indica                   | AF520165 |
| Vitales       | Vitaceae        | Tetrastigma_dubium            | AY674565 |
| Vitales       | Vitaceae        | Tetrastigma_leucostaphylum    | AY739017 |
| Vitales       | Vitaceae        | Vitis_riparia                 | AY453123 |
| Vitales       | Vitaceae        | Yua_thomsonii                 | AF520169 |
| Zygophyllales | Krameriaceae    | Krameria_lanceolata           | AY453089 |
| Zygophyllales | Zygophyllaceae  | Guaicum_sanctum               | AY674517 |
| Zygophyllales | Zygophyllaceae  | Kallstroemia_parviflora       | AY453122 |
| Zygophyllales | Zygophyllaceae  | Tribulus_terrestris           | AF520097 |
| <hr/>         |                 |                               |          |
| Stem Eudicots |                 |                               |          |
| Buxales       | Buxaceae        | Buxus_sempervirens            | AF197786 |
| Buxales       | Buxaceae        | Pachysandra_procumbens        | AF197784 |
| Buxales       | Buxaceae        | Sarcococca_confusa            | AF197785 |
| Buxales       | Didymelaceae    | Didymeles_perrieri            | AF197811 |
| Gunnerales    | Gunneraceae     | Gunnera_manicata              | AF520163 |
| Proteales     | Nelumbonaceae   | Nelumbo_nucifera              | AF197795 |
| Proteales     | Platanaceae     | Platanus_occidentalis         | AF197793 |
| Proteales     | Proteaceae      | Grevillea_robusta             | AF197808 |
| Proteales     | Proteaceae      | Persoonia_katerae             | AF197794 |
| Proteales     | Proteaceae      | Petrophile_canescens          | AF197807 |
| Ranunculales  | Berberidaceae   | Mahonia_bealei                | AF197761 |
| Ranunculales  | Berberidaceae   | Podophyllum_peltatum          | AF197762 |
| Ranunculales  | Eupteleaceae    | Euptelea_polyandra            | AF197787 |
| Ranunculales  | Fumariaceae     | Dicentra_sp_Qiu_95026         | AF197796 |
| Ranunculales  | Lardizabalaceae | Akebia_quinata                | AF197810 |
| Ranunculales  | Lardizabalaceae | Lardizabala_biternata         | AF197789 |
| Ranunculales  | Lardizabalaceae | Sargentodoxa_cuneata          | AF197790 |
| Ranunculales  | Menispermaceae  | Cissampelos_paireira          | AF197775 |
| Ranunculales  | Menispermaceae  | Cocculus_trilobus             | AF197776 |
| Ranunculales  | Papaveraceae    | Sanguinaria_canadensis        | AF197788 |
| Ranunculales  | Ranunculaceae   | Ranunculus_sp_Qiu_95024       | AF197759 |
| Ranunculales  | Ranunculaceae   | Xanthorhiza_simplicissima     | AF197760 |
| Sabiales      | Sabiaceae       | Meliosma_squamulata           | DQ007426 |

|                   |                    |                            |          |
|-------------------|--------------------|----------------------------|----------|
| Sabiales          | Sabiaceae          | Sabia_sp._Qiu_91025        | AF197780 |
| Santalales        | Balanophoraceae    | Dactylanthus_taylorii      | AY957447 |
| Santalales        | Balanophoraceae    | Hachettea_austrocaledonica | AY957448 |
| Santalales        | Balanophoraceae    | Mystropetalon_thomii       | AY957449 |
| Santalales        | Loranthaceae       | Amyema_beccarii            | AY453106 |
| Santalales        | Loranthaceae       | Dendrophthoe_pentandra     | AY453120 |
| Santalales        | Santalaceae        | Osyris_wightiana           | AF520155 |
| Santalales        | Santalaceae        | Santalum_album             | AY957450 |
| Santalales        | Santalaceae        | Thesium_chinense           | AF520102 |
| Santalales        | Schoepfiaceae      | Schoepfia_schreberi        | AY957451 |
| Trochodendrales   | Tetracentraceae    | Tetracentron_sinense       | AF197791 |
| Trochodendrales   | Trochodendraceae   | Trochodendron_aralioides   | AF197792 |
| <b>Magnoliids</b> |                    |                            |          |
| Canellales        | Canellaceae        | Canella_winterana          | AF197757 |
| Canellales        | Canellaceae        | Cinnamodendron_ekmanii     | AF197758 |
| Canellales        | Winteraceae        | Drimys_winteri             | AF197781 |
| Canellales        | Winteraceae        | Takhtajania_perrieri       | DQ007427 |
| Canellales        | Winteraceae        | Tasmania_insidida          | AF197782 |
| Canellales        | Winteraceae        | Zygogynum_pauciflorum      | AF197783 |
| Lurales           | Atherospermataceae | Atherosperma_moschatum     | AF197799 |
| Lurales           | Atherospermataceae | Daphnandra_micrantha       | AF197800 |
| Lurales           | Atherospermataceae | Doryphora_sassafras        | AF197801 |
| Lurales           | Calycanthaceae     | Calycanthus_floridus       | AF197777 |
| Lurales           | Calycanthaceae     | Chimonanthus_praecox       | AF197778 |
| Lurales           | Calycanthaceae     | Idiospermum_australiense   | AF197779 |
| Lurales           | Hernandiaceae      | Gyrocarpus_sp._Chase_317   | AF197805 |
| Lurales           | Hernandiaceae      | Hernandia_ovigera          | DQ007424 |
| Lurales           | Lauraceae          | Cinnamomum_camphora        | AF197797 |
| Lurales           | Lauraceae          | Cryptocarya_meissneriana   | AF197804 |
| Lurales           | Lauraceae          | Laurus_nobilis             | AF197798 |
| Lurales           | Monimiaceae        | Hedycarya_arborea          | AF197806 |
| Lurales           | Monimiaceae        | Palmeria_scandens          | AF197802 |
| Lurales           | Monimiaceae        | Peumus_boldus              | AF197803 |
| Lurales           | Siparunaceae       | Siparuna_decipiens         | AF197809 |
| Magnoliales       | Annonaceae         | Annona_muricata            | AF197766 |
| Magnoliales       | Annonaceae         | Asimina_triloba            | AF197765 |
| Magnoliales       | Annonaceae         | Cananga_odorata            | AF197763 |
| Magnoliales       | Annonaceae         | Polyalthia_suberosa        | AF197764 |
| Magnoliales       | Degeneriaceae      | Degeneria_vitiensis        | AF197771 |
| Magnoliales       | Eupomatiaceae      | Eupomatia_bennettii        | AF197772 |
| Magnoliales       | Himantandraceae    | Galbulimima_belgraveana    | AF197773 |
| Magnoliales       | Magnoliaceae       | Liriodendron_chinense      | AF197774 |
| Magnoliales       | Magnoliaceae       | Magnolia_tripetala         | AF197770 |
| Magnoliales       | Myristicaceae      | Knema_latericia            | AF197767 |
| Magnoliales       | Myristicaceae      | Mauloutchia_chapelieri     | AF197769 |
| Magnoliales       | Myristicaceae      | Myristica_fragrans         | AF197768 |
| Piperales         | Aristolochiaceae   | Aristolochia_macrophylla   | AF197732 |
| Piperales         | Aristolochiaceae   | Asarum_canadense           | AF197751 |
| Piperales         | Aristolochiaceae   | Saruma_henryi              | AF197752 |
| Piperales         | Aristolochiaceae   | Thottea_tomentosa          | AF197733 |
| Piperales         | Hydnoraceae        | Hydnora_africana           | AF503358 |
| Piperales         | Hydnoraceae        | Prosopanche_americana      | AF503359 |
| Piperales         | Lactoridaceae      | Lactoris_fernandeziana     | AF197812 |
| Piperales         | Piperaceae         | Peperomia_obtusifolia      | AF197814 |
| Piperales         | Piperaceae         | Piper_betle                | AF197750 |
| Piperales         | Piperaceae         | Zippelia_begoniifolia      | AF332107 |
| Piperales         | Saururaceae        | Anemopsis_californica      | AF197747 |
| Piperales         | Saururaceae        | Gymnotheca_chinensis       | AF332103 |

|                         |                   |                              |          |
|-------------------------|-------------------|------------------------------|----------|
| Piperales               | Saururaceae       | Gymnotheca_involucrata       | AF332105 |
| Piperales               | Saururaceae       | Houttuynia_cordata           | AF197749 |
| Piperales               | Saururaceae       | Saururus_cernuus             | AF197748 |
| Piperales               | Saururaceae       | Saururus_chinensis           | AF332106 |
| <b>Chloranthales</b>    |                   |                              |          |
| Chloranthales           | Chloranthaceae    | Ascarina_sp._Qiu-M149        | AF197755 |
| Chloranthales           | Chloranthaceae    | Chloranthus_holostegius      | AF332104 |
| Chloranthales           | Chloranthaceae    | Chloranthus_multistachys     | AF197753 |
| Chloranthales           | Chloranthaceae    | Hedyosmum_arborescens        | AF197756 |
| Chloranthales           | Chloranthaceae    | Sarcandra_chloranthoides     | AF197754 |
| <b>Monocots</b>         |                   |                              |          |
| Acorales                | Acoraceae         | Acorus_calamus               | DQ007422 |
| Acorales                | Acoraceae         | Acorus_gramineus             | DQ007423 |
| Alismatales             | Alismataceae      | Alisma_plantago-aquatica     | AF197815 |
| Alismatales             | Araceae           | Orontium_aquaticum           | AF197745 |
| Alismatales             | Araceae           | Spathiphyllum_wallisii       | AF197746 |
| Alismatales             | Juncaginaceae     | Triglochin_maritima          | AF197725 |
| Alismatales             | Potamogetonaceae  | Potamogeton_bercholdii       | AF197724 |
| Alismatales             | Tofieldiaceae     | Pleea_tenuifolia             | AF197743 |
| Alismatales             | Tofieldiaceae     | Tofieldia_calyculata         | AF197744 |
| Arecales                | Arecaceae         | Caryota_mitis                | AY453098 |
| Arecales                | Arecaceae         | Nypa_fruticans               | AY289674 |
| Asparagales             | Asparagaceae      | Asparagus_officinalis        | AF197736 |
| Asparagales             | Ruscaceae         | Polygonatum_biflorum         | AY453077 |
| Commelinales            | Commelinaceae     | Tradescantia_ohiensis        | AY453108 |
| Dioscoreales            | Dioscoreaceae     | Dioscorea_sp._Qiu_94044      | AF197737 |
| Liliales                | Alstroemeriaceae  | Alstroemeria_hybrid_cultivar | AY453076 |
| Pandanales              | Cyclanthaceae     | Carludovica_palmata          | AF197734 |
| Pandanales              | Stemonaceae       | Croomia_pauciflora           | AF197735 |
| Poales                  | Poaceae           | Oryza_sativa                 | BA000029 |
| Poales                  | Poaceae           | Triticum_aestivum            | AP008982 |
| Poales                  | Poaceae           | Zea_mays                     | AY506529 |
| Zingiberales            | Strelitziaceae    | Strelitzia_reginae           | AY453112 |
| <b>Ceratophyllales</b>  |                   |                              |          |
| Ceratophyllales         | Ceratophyllaceae  | Ceratophyllum_demersum       | AF197730 |
| Ceratophyllales         | Ceratophyllaceae  | Ceratophyllum_submersum      | AF197731 |
| <b>Stem Angiosperms</b> |                   |                              |          |
| Amborellales            | Amborellaceae     | Amborella_trichopoda         | AF197813 |
| Austrobaileyales        | Austrobaileyaceae | Austrobaileya_scandens       | AF197742 |
| Austrobaileyales        | Schisandraceae    | Illicium_floridanum          | AF197740 |
| Austrobaileyales        | Schisandraceae    | Kadsura_japonica             | AF197738 |
| Austrobaileyales        | Schisandraceae    | Schisandra_sphenanthera      | AF197739 |
| Austrobaileyales        | Trimeniaceae      | Trimenia_moorei              | AF197741 |
| Nymphaeales             | Cabombaceae       | Brasenia_schreberi           | AF197728 |
| Nymphaeales             | Cabombaceae       | Cabomba_sp._Qiu_97027        | AF197729 |
| Nymphaeales             | Nymphaeaceae      | Nuphar_sp._Qiu_M114          | AF197726 |
| Nymphaeales             | Nymphaeaceae      | Nymphaea_sp._Qiu_91029       | AF197727 |
| <b>Gymnosperms</b>      |                   |                              |          |
| Coniferales             | Pinaceae          | Larix_decidua                | DQ087882 |
| Coniferales             | Pinaceae          | Larix_gmelinii               | DQ087887 |
| Coniferales             | Pinaceae          | Larix_griffithiana           | DQ087889 |
| Coniferales             | Pinaceae          | Larix_kaempferi              | DQ087883 |
| Coniferales             | Pinaceae          | Larix_laricina               | DQ087881 |
| Coniferales             | Pinaceae          | Larix_lyallii                | DQ087885 |
| Coniferales             | Pinaceae          | Larix_mastersiana            | DQ087888 |
| Coniferales             | Pinaceae          | Larix_occidentalis           | DQ087886 |
| Coniferales             | Pinaceae          | Larix_potaninii              | DQ087890 |
| Coniferales             | Pinaceae          | Larix_sibirica               | DQ087884 |

|                |                 |                         |          |
|----------------|-----------------|-------------------------|----------|
| Coniferales    | Pinaceae        | Picea_chihuahuana       | DQ414430 |
| Coniferales    | Pinaceae        | Picea_martinezii        | DQ414431 |
| Coniferales    | Pinaceae        | Pinus_sp._Qiu_94013     | AF197723 |
| Coniferales    | Podocarpaceae   | Podocarpus_macrophyllus | DQ007425 |
| Cycadales      | Cycadaceae      | Cycas_revoluta          | AF197720 |
| Cycadales      | Zamiaceae       | Zamia_integrifolia      | AF197721 |
| Ginkgoales     | Ginkgoaceae     | Ginkgo_biloba           | AF197722 |
| Gnetales       | Gnetaceae       | Gnetum_gnemon           | AF197718 |
| Welwitschiales | Welwitschiaceae | Welwitschia_mirabilis   | AF197719 |

---

**Table S5. Taxon information for 5-gene analysis**

| <b>Species</b>          | <b>atp1</b>      | <b>cob</b>       | <b>cox1</b>      | <b>cox2</b>     | <b>cox3</b>       |
|-------------------------|------------------|------------------|------------------|-----------------|-------------------|
| Silene_acaulis          | EF547203         | AF530621         | EF547218         | EF547229        | EF547232          |
| Silene_dioica           | –                | EF547209         | EF547219         | –               | –                 |
| Silene_douglasii        | –                | EF547210         | EF547220         | –               | –                 |
| Silene_latifolia        | EF547204         | AF530630         | EF547221         | –               | EF547233          |
| Silene_noctiflora       | EF547205         | EF547211         | EF547222         | EF547230        | EF547234          |
| Silene_nutans           | –                | EF547212         | EF547223         | –               | –                 |
| Silene_rupestris        | –                | EF547213         | EF547224         | –               | –                 |
| Silene_scouleri         | –                | EF547214         | EF547225         | –               | –                 |
| Silene_virginica        | –                | EF547215         | EF547226         | –               | –                 |
| Silene_vulgaris         | –                | EF547216         | EF547227         | –               | –                 |
| Gypsophila_repens       | –                | EF547207         | EF547217         | –               | –                 |
| Stellaria_sp.           | EF547206         | AF530631         | EF547228         | –               | –                 |
| Beta_vulgaris           | BA000009         | BA000009         | X57693           | BA000009        | BA000009          |
| Nepenthes_sp.           | EF547202         | EF547208         | AY600110         | –               | EF547231          |
| Plantago_lanceolata     | AY818937         | unpubl. (JPM)    | AJ389611         | unpubl. (JPM)   | unpubl. (JPM)     |
| Plantago_rugelii        | AY818939         | AY818946         | AJ389606         | AY818947        | –                 |
| Nicotiana_tabacum       | BA000042         | BA000042         | BA000042         | BA000042        | BA000042          |
| Daucus_carota           | AF301604         | AY007816         | AY820131         | X63625          | –                 |
| Sambucus_sp.            | AY741813         | DQ317064         | AF193965         | –               | DQ317066          |
|                         | (S._sieboldiana) | (S._canadensis)  | (S._canadensis)  |                 | (S._canadensis)   |
| Erodium_pelargoniflorum | DQ317061         | –                | DQ317039         | –               | –                 |
| Pelargonium_x_hortorum  | DQ317063         | DQ317065         | DQ317047         | DQ317069        | DQ317067          |
| Oenothera_sp.           | X04023           | X07126           | X05465           | X00212          | X04764            |
|                         | (O._biennis)     | (O._sp.)         | (O._berteriana)  | (O._villaricae) | (O._berteriana)   |
| Arabidopsis_thaliana    | Y08501           | Y08501           | X94583           | Y08501          | Y08501            |
| Pisum_sativum           | X05366           | AJ132231         | X14409           | AJ414385        | –                 |
| Platanus_occidentalis   | AY009423         | AY832084         | AY009450         | –               | AY832117          |
| Mahonia_bealei          | AF197659         | AY832081         | –                | –               | AY832113          |
| Laurus_nobilis          | AF197682         | AY832079         | AF193956         | AY832094        | AY832111          |
| Liriodendron_tulipifera | AY394730         | AY832080         | AF193959         | AY832090        | AY832112          |
| Piper_sp.               | AF197630         | AY832083         | AY009448         | AY832091        | AY832116          |
|                         | (P._betle)       | (P._betle)       | (P._bicolor)     | (P._betle)      | (P._betle)        |
| Eichhornia_sp.          | AY299762         | AY832078         | –                | AY832093        | AY832110          |
|                         | (E._azurea)      | (E._crassipes)   |                  | (E._crassipes)  | (E._crassipes)    |
| Oryza_sativa            | BA000029         | BA000029         | BA000029         | BA000029        | BA000029          |
| Phoenix_sp.             | U58831           | DQ916691         | AY166800         | –               | AY166801          |
|                         | (P._reclinata)   | (P._dactylifera) | (P._dactylifera) |                 | (P._dactylifera)  |
| Philodendron_hederaceum | –                | AY832082         | AJ223438         | AY832095        | AY832114          |
| Acorus_sp.              | AF039256         | DQ916645         | AF193944         | AJ006146        | –                 |
|                         | (A._calamus)     | (A._gramineus)   | (A._calamus)     | (A._calamus)    |                   |
| Nymphaea_sp.            | AY299814         | DQ916611         | AF020570         | –               | AY832120          |
|                         | (N._odorata)     | (N._odorata)     | (N._odorata)     |                 | (N._sp.)          |
| Amborella_trichopoda    | AY009407         | AY832075         | AY009430         | AY832089        | AY832106          |
| Araucaria_heterophylla  | AF209104         | –                | AF020558         | –               | –                 |
| Podocarpus_macrophyllus | AF209105         | –                | AF020575         | –               | –                 |
| Juniperus_virginiana    | AF209106         | –                | AF020567         | –               | –                 |
| Pinus_sp.               | AF209108         | –                | AF020574         | –               | AY832115          |
|                         | (P._strobilus)   |                  | (P._strobilus)   |                 | (P._thunbergii)   |
| Gnetum_sp.              | AF197617         | –                | AF020566         | –               | X92722            |
|                         | (G._gnemon)      |                  | (G._leyboldii)   |                 | (G._gnemon)       |
| Ephedra_sp.             | DQ646225         | –                | AF020564         | –               | X92735            |
|                         | (E._distachya)   |                  | (E._viridis)     |                 | (E._gerardiana)   |
| Ginkgo_biloba           | AF209110         | –                | AF020565         | AJ874265        | X76280            |
| Cycas_revoluta          | AF197623         | –                | AF020562         | DQ677484        | X76279, X93553    |
| Zamia_sp.               | AF209111         | –                | AF020583         | –               | AY832118          |
|                         | (Z._furfuracea)  |                  | (Z._furfuracea)  |                 | (Z._integrifolia) |

**Table S6. Taxon information for rDNA genes**

| <b>Species</b>                 | <b>SSU rDNA</b>          | <b>LSU rDNA</b>             |
|--------------------------------|--------------------------|-----------------------------|
| <i>Silene_acaulis</i>          | EF547249                 | EF547246                    |
| <i>Silene_latifolia</i>        | EF547250                 | EF547247                    |
| <i>Silene_noctiflora</i>       | EF547251                 | EF547248                    |
| <i>Beta_vulgaris</i>           | BA000009                 | BA000009                    |
| <i>Plantago_lanceolata</i>     | AJ389619                 | unpublished (JPM)           |
| <i>Plantago_rugelii</i>        | AJ389615                 | AY818948                    |
| <i>Nicotiana_tabacum</i>       | BA000042                 | BA000042                    |
| <i>Sambucus_canadensis</i>     | AF194000                 | –                           |
| <i>Erodium_pelargoniflorum</i> | DQ317006                 | –                           |
| <i>Pelargonium_x_hortorum</i>  | DQ317013                 | DQ317059                    |
| <i>Oenothera_berteriana</i>    | X61277                   | X02559                      |
| <i>Arabidopsis_thaliana</i>    | Y08501                   | Y08501                      |
| <i>Platanus_occidentalis</i>   | AF161090                 | DQ008752                    |
| <i>Mahonia_bealei</i>          | DQ008682                 | DQ008754                    |
| <i>Laurus_nobilis</i>          | AF193990                 | DQ008773                    |
| <i>Liriodendron_sp.</i>        | AF193993                 | DQ008786                    |
|                                | ( <i>L._tulipifera</i> ) | ( <i>L._chinense</i> )      |
| <i>Piper_betle</i>             | AF161088                 | DQ008795                    |
| <i>Oryza_sativa</i>            | BA000029                 | BA000029                    |
| <i>Spathiphyllum_wallisii</i>  | DQ008673                 | DQ008814                    |
| <i>Acorus_calamus</i>          | AF193976                 | DQ008817                    |
| <i>Nymphaea_sp._Qiu_91029</i>  | AF161091                 | DQ008828                    |
| <i>Amborella_trichopoda</i>    | AF193987                 | DQ008832                    |
| <i>Araucaria_sp.</i>           | AB029364                 | DQ647874                    |
|                                | ( <i>A._excelsa</i> )    | ( <i>A._raucana</i> )       |
| <i>Podocarpus_sp.</i>          | AB029369                 | DQ008837                    |
|                                | ( <i>P._costalis</i> )   | ( <i>P._macrophyllus</i> )  |
| <i>Juniperus_chinensis</i>     | AB029368                 | –                           |
| <i>Pinus_sp.</i>               | AF058659                 | DQ008835                    |
|                                | ( <i>P._strobus</i> )    | ( <i>P._sp._Qiu_94013</i> ) |
| <i>Gnetum_gnemon</i>           | DQ008701                 | DQ008833                    |
| <i>Ephedra_antisiphilitica</i> | AF161084                 | –                           |
| <i>Ginkgo_biloba</i>           | AB029355                 | DQ008838                    |
| <i>Cycas_revoluta</i>          | AB029356                 | DQ008840                    |
| <i>Zamia_integrifolia</i>      | AB029357                 | DQ008839                    |

**Table S7. Taxon information for Supplementary Figure S1**

| <b>Species</b>                  | <b>matK</b> |
|---------------------------------|-------------|
| <i>Silene_diclinis</i>          | EF547236    |
| <i>Silene_latifolia</i>         | EF547239    |
| <i>Silene_dioica</i>            | EF547237    |
| <i>Silene_vulgaris</i>          | EF547245    |
| <i>Silene_douglasii</i>         | EF547238    |
| <i>Silene_virginica</i>         | EF547244    |
| <i>Silene_scouleri</i>          | EF547243    |
| <i>Silene_noctiflora</i>        | EF547240    |
| <i>Silene_nutans</i>            | EF547241    |
| <i>Silene_rupestris</i>         | EF547242    |
| <i>Silene_aucaulis</i>          | EF547235    |
| <i>Petrocoptis_pyrenaica</i>    | AY936314    |
| <i>Agrostemma_githago</i>       | AY042539    |
| <i>Cerastium_fontanum</i>       | AY936296    |
| <i>Stellaria_media</i>          | AY936299    |
| <i>Dianthus_seguieri</i>        | AY936321    |
| <i>Gypsophila_altissima</i>     | AY042597    |
| <i>Saponaria_officinalis</i>    | AY936325    |
| <i>Moehringia_trinervia</i>     | AY042615    |
| <i>Scleranthus_perennis</i>     | AY514847    |
| <i>Drypis_spinosa</i>           | AY936293    |
| <i>Illecebrum_verticillatum</i> | AY514849    |
| <i>Polycarpon_tetraphyllum</i>  | AY936287    |
| <i>Herniaria_baetica</i>        | AY936283    |
| <i>Paronychia_kapela</i>        | AY936284    |
| <i>Corrigiola_litoralis</i>     | AY936331    |
| <i>Telephium_oligospermum</i>   | AY042664    |
| <i>Froelichia_floridana</i>     | AY514799    |
| <i>Amaranthus_greggii</i>       | AY514808    |
| <i>Bosea_yervamora</i>          | AY514810    |
| <i>Chenopodium_acuminatum</i>   | AY514836    |
| <i>Spinacia_oleracea</i>        | AJ400848    |
| <i>Beta_vulgaris</i>            | DQ116790    |
| <i>Achatocarpus_praecox</i>     | AY514845    |
| <i>Phaulothamnus_spinescens</i> | AY514846    |
| <i>Mammillaria_haageana</i>     | AY015289    |
| <i>Portulaca_oleracea</i>       | AY875349    |
| <i>Anacampteros_vulcanensis</i> | AY514851    |
| <i>Halophytum_ameghinoi</i>     | AY514852    |
| <i>Rivina_humilis</i>           | AY514850    |
